# Supplementary material for: Ferric nitrene-promoted anti-Markovnikov ring-opening of epoxides and nucleophilic functionalization of benzylic C–H bonds under photo-irradiation
Source: Royal Society of Chemistry journal article supplement (doi:10.1039/d4cc04236k), 2024-12-16

## Supporting Information

# Ferric Nitrene-Promoted anti-Markovnikov Ring-Opening of Epoxides and Nucleophilic Functionalization of Benzylic C-H Bonds under Photo-Irradiation

Ming Hou<sup>ab#</sup>, Mengjie Jia<sup>c#</sup>, Rui Qi<sup>b</sup>, Zhide Zhang<sup>b</sup>, Linli He,<sup>a\*</sup> Tianwen Bai,<sup>b</sup> Chen Bao,<sup>d\*</sup> and Guanyinsheng Qiu<sup>b\*</sup>

---

<sup>a</sup> Department of Physics, Wenzhou University, Wenzhou, Zhejiang 325035, China;

<sup>b</sup> College of Biological, Chemical Sciences and Engineering, Jiaxing University, Jiaxing 314001, Zhejiang, China. E-mail: qiuguanyinsheng@mail.zjxu.edu.cn

<sup>c</sup>Research Center of Clinical Pharmacy of The First Affiliated Hospital & Liangzhu Laboratory, Zhejiang University School of Medicine, Hangzhou, China;

<sup>d</sup>School of Urban Construction, Jiaxing Vocational & Technical Colledge, Jiaxing, 314000, Email: 327425554@qq.com

# equal contribution to this paper

## Table of Contents

|                                                                            |    |
|----------------------------------------------------------------------------|----|
| 1. General Information.....                                                | 3  |
| 2. The spectrum of our lamp and the visible-light irradiation instrument.. | 3  |
| 3. Experimental procedure for the synthesis of epoxides.....               | 4  |
| 4. General procedure for the synthesis of 3, 5 and 8 .....                 | 5  |
| 5. UV-visible absorption experiment.....                                   | 7  |
| 6. Characterization Data of All Products .....                             | 7  |
| 7. Reference .....                                                         | 17 |
| 8. Spectra of All Products .....                                           | 18 |
| 9. Crystallographic data .....                                             | 52 |

## 1. General Information

Unless otherwise noted, all reactions were performed under air using flame-dried glassware. MeCN, DCE, 1,4-dioxane and DCM were purchased as reaction solvents without preprocessing. All new compounds were fully characterized. NMR-spectra were recorded on Bruker ARX-400 MHz spectrometer.  $^1\text{H}$  NMR spectra data were reported as  $\delta$  values in ppm relative to chloroform (87.26).  $^{13}\text{C}$  NMR spectra data were reported as  $\delta$  values in ppm relative to chloroform ( $\delta$  77.0).  $^1\text{H}$  NMR coupling constants were reported in Hz, and multiplicity was indicated as follows: s (singlet); d (doublet); t (triplet); q (quartet); quint (quintet); m (multiplet); dd (doublet of doublets); ddd (doublet of doublet of doublets); dddd (doublet of doublet of doublet of doublets); dt (doublet of triplets); td (triplet of doublets); ddt (doublet of doublet of triplets); dq (doublet of quartets); app (apparent); br (broad). The reactor was 2.0 cm from 10W blue LED strips, the power density of the incident light was recorded on a HPS350j spectral irradiance colorimeter (Beijing Rogertech Co.ltd ). Photoredox reactions were carried out in flame-dried 10 mL sealed tubes with Teflon screw caps under air. Unless otherwise noted, materials obtained from commercial suppliers were used without further purification. The purity of  $\text{FeCl}_3$  used in the paper is > 99.9% metal basis.

## 2. The spectrum of our lamp and the visible-light irradiation instrument

All reactions have been studied in borosilicate glass vessels irradiated by a blue light LED strips purchased from Beijing Rogertech Co.ltd without using filters.

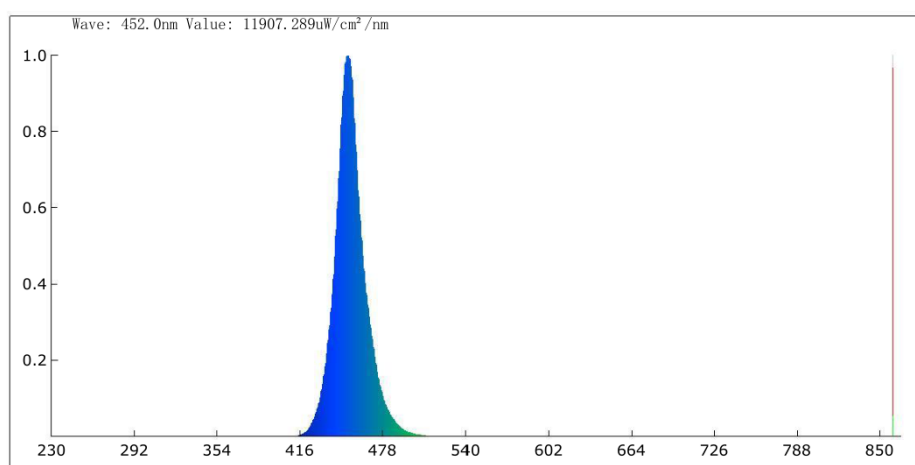

**Figure S1.** The spectrum of our blue LED.  $\lambda_{\text{max}} = 460$  nm.

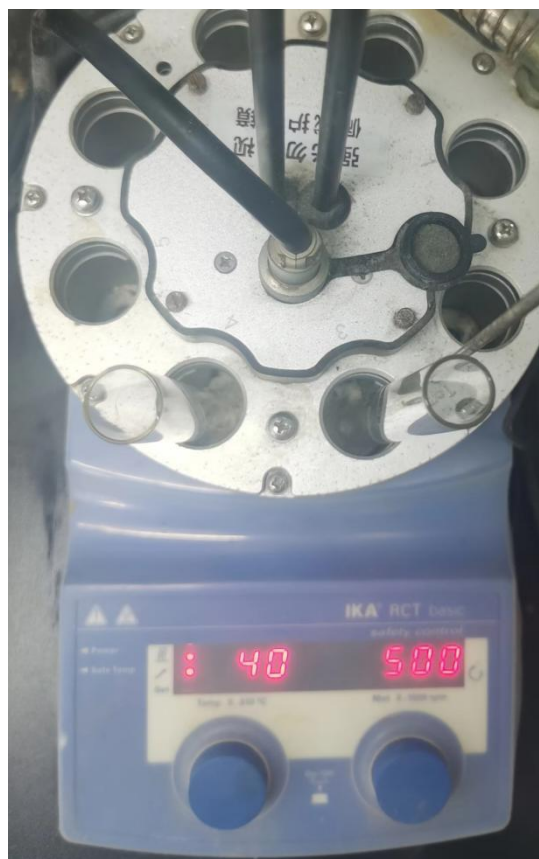

**Figure S2.** Photograph of the reaction setup

### 3. Experimental procedure for the synthesis of epoxides

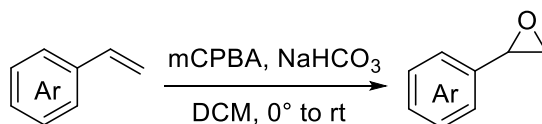

Unless otherwise mentioned in the following specific substrates, the general procedure is: to a 100 mL dried Schlenk flask was added alkene (1.0 equiv),  $\text{NaHCO}_3$  (1.3 equiv) and  $\text{CH}_2\text{Cl}_2$  (20 mL) under Ar atmosphere. The flask was then fitted with an addition funnel containing m-CPBA (73%, 1.2 equiv.) dissolved in  $\text{CH}_2\text{Cl}_2$  (20 mL). The m-CPBA solution was added dropwise through the addition funnel over 20 minutes at  $0^\circ\text{C}$ . The reaction was then stirred for an additional 1 h and then allowed to warm to room temperature. After completion of the reaction (TLC monitoring), the reaction mixture is quenched with aqueous  $\text{Na}_2\text{S}_2\text{O}_3$ , and the aqueous phase is extracted with  $\text{CH}_2\text{Cl}_2$ . The combined organic layers are washed successively with a saturated solution of  $\text{NaHCO}_3$  and brine and dried over  $\text{Na}_2\text{SO}_4$ . The filtrate was concentrated under reduced pressure and the crude product was purified by silica gel column chromatography (PE:EA) with  $\text{Et}_3\text{N}$  (1%) afforded the corresponding epoxides.<sup>[3]</sup>

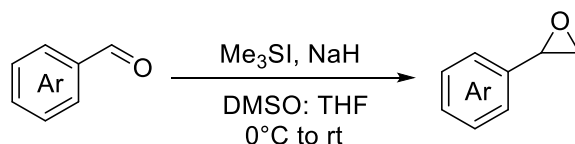

Unless otherwise mentioned in the following specific substrates, the general procedure is: to an oven dried Schlenk flask was added trimethylsulfonium iodide (1.6 equiv) and dry DMSO/THF (15 mL, 2/1), and then NaH (60% in mineral oil, 1.5 equiv) was added to the above mixture at 0 °C under argon, the reaction allowed to stir for 30 min at room temperature. Aldehyde (1.0 equiv) in THF was added to the reaction at 0 °C. The reaction mixture is maintained at 0 °C for 1 h and allowed to stir at room temperature for overnight. Then the reaction was quenched with H<sub>2</sub>O, the aqueous layer was extracted with Et<sub>2</sub>O. The combined organic extracts were washed with brine and dried over Na<sub>2</sub>SO<sub>4</sub>. The filtrate was concentrated under reduced pressure and the crude product was purified by silica gel column chromatography (PE: EA) with Et<sub>3</sub>N (1%) afforded the corresponding epoxides. <sup>[3]</sup>

#### 4. General procedure for the synthesis of 3, 5 and 8

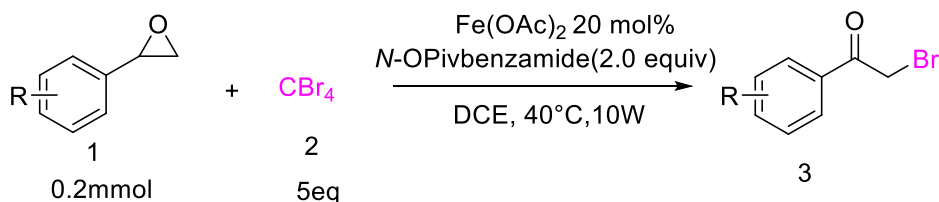

To a 10 mL sealed tube containing a magnetic stirrer and fitted with a Teflon cap, the epoxides **1** (0.2 mmol), **2** (5.0 equiv), *N*-pivaloyloxybenzamide (2.0 eq), PPh<sub>3</sub> (0.3 eq), Fe(OAc)<sub>2</sub> (0.2 equiv), and DCE (1.0 mL) were added. The tube was screwed and the mixture was stirred at 40°C under blue light irradiation (10W) with a cooling fan. After 4 h, the mixture was diluted with EA (5.0 mL) and the aqueous phase was separated and discarded. The organic phase was vacuumed to remove the solvent and the crude mixture was purified through silica gel column with ethyl acetate/petroleum ether as the eluent.

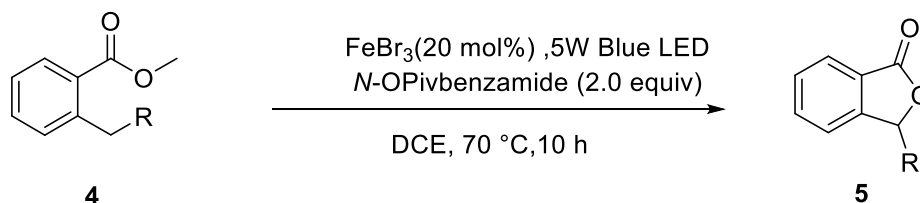

To the test tube was added 2-ethylbenzoic ester (0.4 mmol, 1.0 equiv.), FeBr<sub>3</sub> (0.08 mmol, 0.2 equiv.), *N*-pivaloyloxybenzamide (0.8 mmol, 2.0 equiv), and then 1, 2-Dichloroethane (2 mL) was

added to the mixture. The mixture was then stirred under blue light at 70°C for 5W until the substrate was completely consumed, and the resulting mixture was cooled to room temperature. Extract the mixture with EA (2 mL x 3). The combined organic layers were dried over anhydrous Na<sub>2</sub>SO<sub>4</sub>. The solvent was removed in vacuo and the residue was purified by silica gel chromatography using a petroleum ether/ethyl acetate mixture to give the desired product.

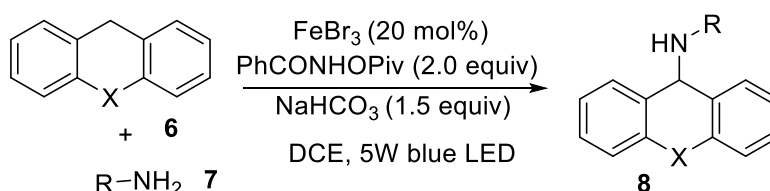

To was added a mixture of oxanthene **6** (0.2mmol, 1.0 equiv), *N*-pivaloyloxybenzamide (0.4 mmol, 2.0 equiv), NaHCO<sub>3</sub> (1.5 equiv), amine **7** (0.3 mmol, 1.5 equiv) and FeBr<sub>3</sub> (0.2 equiv) in DCE (2 mL) was added into a 10 mL vial equipped with a stir bar. The vial was placed in a blue 5 W LED 30°C photoreactor until the reaction is complete. The reaction solution was transferred to a 25 mL round bottom bottle and added into water (3 mL). The resulting mixture was extracted by DCM (3×3 mL). The combined organic layers were dried over anhydrous Na<sub>2</sub>SO<sub>4</sub>. The solvent was removed in vacuo and the residue was purified by flash chromatography (eluent: Petroleum ether/dichloromethane = 2/1) provided the target product **8**.

## 5. UV-visible absorption experiment

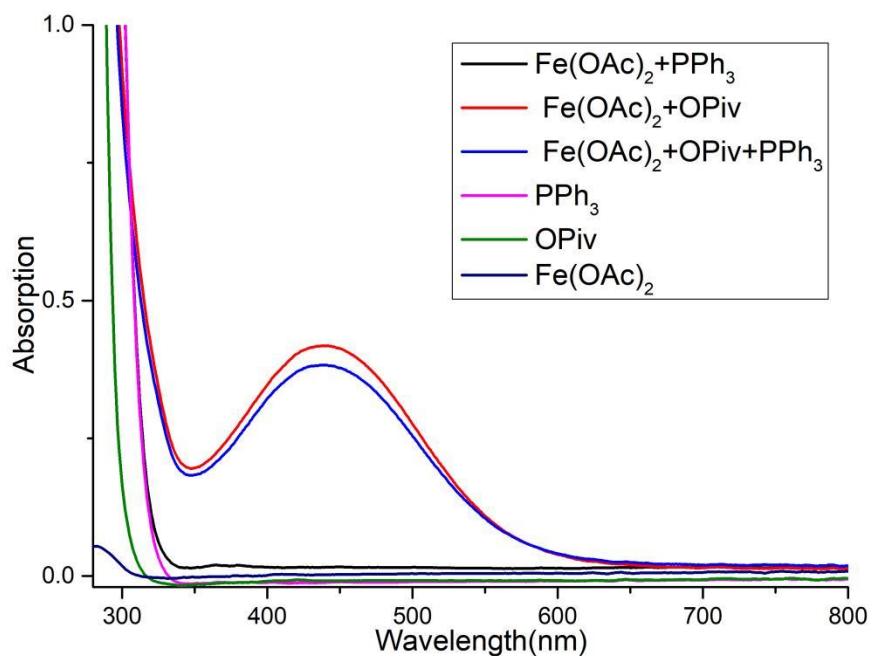

### Calculation details

DFT calculations were employed to optimize structures under B3LYP/6-31+G(d,p) with tight criteria, with frequency calculations ensuring that all optimized structures and transition states had zero or one imaginary frequency, respectively. It is worthy of noticing that the multiplicity of iron atom is estimated at sextet state. All calculations results were carried out with Gaussian 09 program.

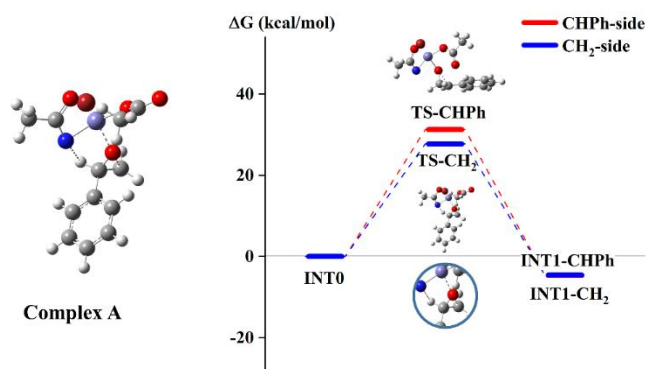

**Figure 1.** The whole profile of calculated reaction pathways of different ring-opening side (CH<sub>2</sub> side (blue line,  $\Delta G = 27.7$  kcal/mol) and CHPh side (red line,  $\Delta G = 31.3$  kcal/mol)), with 3D structure of critical transition states. A 3D figure of N-CH interaction of INT0 is included.

According to DFT calculations, the selective ring-opening pathways of epoxides catalyzed by iron-catalyst were elucidated as depicted in the figure. Initially, the iron catalyst coordinates with the oxygen atom of the epoxide, followed by the induced ring-opening upon the attack of bromide anion. According to the computational results, the energy barrier for the bromide anion attacking the unsubstituted side is significantly lower than that for attacking the substituted aromatic ring side. This energy barrier difference suggests that the ring-opening occurs preferentially and specifically on the unsubstituted side. Additionally, thermodynamic analysis of the ring-opened product (INT1) further confirms that the product derived from the ring-opening on the unsubstituted side is more stable.

#### Cartesian coordination of intermediates and transition states

|                                                         |           |           |           |                                                         |           |           |           |
|---------------------------------------------------------|-----------|-----------|-----------|---------------------------------------------------------|-----------|-----------|-----------|
|                                                         |           |           |           | H                                                       | -4.418318 | 3.715692  | 0.355808  |
| INT0                                                    |           |           |           | O                                                       | -2.108123 | 2.404220  | 0.889197  |
|                                                         |           |           |           | O                                                       | -2.274763 | -0.817422 | 1.057523  |
| Fe                                                      | 1.333938  | 0.370514  | 0.426270  | C                                                       | 1.351511  | -0.273344 | -0.039283 |
| N                                                       | 1.105979  | 1.640466  | 1.846433  | C                                                       | 1.425621  | -1.115143 | -1.324669 |
| C                                                       | 0.333646  | 2.410581  | 1.127391  | O                                                       | 0.410819  | 0.737197  | -0.171422 |
| C                                                       | -0.230604 | 3.733275  | 1.612089  | H                                                       | 1.101587  | -0.944857 | 0.796142  |
| H                                                       | -1.327206 | 3.706621  | 1.567699  | H                                                       | 2.137767  | -1.938968 | -1.255270 |
| H                                                       | 0.089774  | 3.942224  | 2.637372  | H                                                       | 1.642147  | -0.488468 | -2.191370 |
| H                                                       | 0.103622  | 4.544128  | 0.951603  | Br                                                      | -0.333151 | -1.946634 | -1.705252 |
| O                                                       | 0.004939  | 2.025662  | -0.084930 | C                                                       | 2.754529  | 0.292130  | 0.194507  |
| O                                                       | 2.836880  | 1.024192  | -0.823967 | C                                                       | 3.035386  | 1.637968  | -0.072768 |
| C                                                       | -1.517883 | -0.627048 | -0.765382 | C                                                       | 3.782468  | -0.526583 | 0.685874  |
| C                                                       | -0.793306 | -1.890842 | -0.503041 | C                                                       | 4.313393  | 2.156026  | 0.157017  |
| O                                                       | -0.651116 | -0.764779 | 0.385750  | H                                                       | 2.224109  | 2.269226  | -0.422071 |
| H                                                       | -1.099438 | 0.028859  | -1.524250 | C                                                       | 5.061499  | -0.012035 | 0.913371  |
| H                                                       | 0.104274  | -2.118279 | -1.070372 | H                                                       | 3.570468  | -1.568372 | 0.921801  |
| H                                                       | -1.328938 | -2.728743 | -0.058056 | C                                                       | 5.334207  | 1.333425  | 0.643971  |
| Br                                                      | 2.384722  | -1.787115 | 0.999970  | H                                                       | 4.511807  | 3.207749  | -0.041251 |
| C                                                       | -2.973832 | -0.474186 | -0.482597 | H                                                       | 5.842900  | -0.658745 | 1.308271  |
| C                                                       | -3.516121 | -0.798031 | 0.769472  | H                                                       | 6.327031  | 1.739122  | 0.828013  |
| C                                                       | -3.827708 | -0.013476 | -1.494380 | C                                                       | -1.750143 | -1.750057 | 1.801254  |
| C                                                       | -4.889143 | -0.682439 | 0.995373  | C                                                       | -2.772771 | -2.760703 | 2.316845  |
| H                                                       | -2.848885 | -1.117713 | 1.564972  | H                                                       | -3.582266 | -2.240295 | 2.841755  |
| C                                                       | -5.202351 | 0.097248  | -1.270371 | H                                                       | -3.224535 | -3.288132 | 1.467783  |
| H                                                       | -3.409130 | 0.264780  | -2.459297 | H                                                       | -2.296747 | -3.482939 | 2.985203  |
| C                                                       | -5.738790 | -0.238264 | -0.023608 | O                                                       | -0.553182 | -1.857559 | 2.086836  |
| H                                                       | -5.295819 | -0.929356 | 1.973657  | (three lowest vibration frequency: 19.93, 31.73, 35.32) |           |           |           |
| H                                                       | -5.851638 | 0.457260  | -2.065554 |                                                         |           |           |           |
| H                                                       | -6.807657 | -0.145338 | 0.155774  |                                                         |           |           |           |
| C                                                       | 2.390898  | 0.503478  | -1.905183 |                                                         |           |           |           |
| C                                                       | 3.207373  | 0.689938  | -3.171217 | INT1-CHPh                                               |           |           |           |
| H                                                       | 3.524701  | 1.733973  | -3.264370 | Fe                                                      | -1.238085 | 0.060678  | -0.076991 |
| H                                                       | 4.112645  | 0.073287  | -3.107392 | N                                                       | -1.202133 | -0.902713 | 1.670374  |
| H                                                       | 2.629866  | 0.389268  | -4.049408 | C                                                       | -2.010843 | -0.048499 | 2.223718  |
| O                                                       | 1.316954  | -0.151324 | -1.925687 | C                                                       | -2.446883 | -0.085833 | 3.660150  |
| (three lowest vibration frequency: 23.15, 26.70, 28.35) |           |           |           | H                                                       | -2.134023 | 0.840808  | 4.155334  |
|                                                         |           |           |           | H                                                       | -3.540849 | -0.144939 | 3.708674  |
|                                                         |           |           |           | H                                                       | -2.009299 | -0.944498 | 4.179316  |
| INT1-CH2                                                |           |           |           | O                                                       | -2.413163 | 0.902491  | 1.426154  |
|                                                         |           |           |           | O                                                       | -1.082971 | 1.767370  | -0.986977 |
| Fe                                                      | -1.430912 | 0.677165  | 0.146462  | C                                                       | 0.807064  | -1.980498 | -0.306677 |
| N                                                       | -2.601086 | 1.569990  | -1.168540 | C                                                       | 2.301672  | -2.136560 | -0.302148 |
| C                                                       | -2.765599 | 2.498615  | -0.286343 | O                                                       | 0.332945  | -0.706144 | -0.617875 |
| C                                                       | -3.660317 | 3.711124  | -0.438301 | H                                                       | 0.391875  | -2.711060 | -1.027065 |
| H                                                       | -3.068510 | 4.629531  | -0.329837 | H                                                       | 2.630596  | -3.171947 | -0.412326 |
| H                                                       | -4.152563 | 3.705410  | -1.415312 | Br                                                      | -2.965467 | -1.193237 | -1.197229 |



|   |           |           |           |
|---|-----------|-----------|-----------|
| C | 3.321644  | -1.174522 | -0.109962 |
| C | 4.689353  | -1.596117 | -0.151329 |
| C | 3.078777  | 0.212947  | 0.139747  |
| C | 5.733832  | -0.703293 | 0.043497  |
| H | 4.904995  | -2.646869 | -0.340143 |
| C | 4.136159  | 1.093723  | 0.333736  |
| H | 2.060161  | 0.579237  | 0.174461  |
| C | 5.469237  | 0.654658  | 0.288950  |
| H | 6.762047  | -1.059858 | 0.005519  |
| H | 3.911367  | 2.140701  | 0.524425  |
| H | 6.287323  | 1.355307  | 0.441924  |
| C | -0.260621 | 2.689312  | -0.570091 |
| C | -0.323948 | 3.980694  | -1.379678 |
| H | -0.116718 | 3.767579  | -2.434970 |
| H | -1.335668 | 4.400143  | -1.325670 |
| H | 0.398670  | 4.706814  | -0.998578 |
| O | 0.512425  | 2.567460  | 0.385808  |
| H | 0.419454  | -2.292258 | 0.684888  |

(three lowest vibration frequency: 16.94, 27.41, 33.83)

TS-CH2

|    |           |           |           |
|----|-----------|-----------|-----------|
| Fe | -1.138402 | -0.002039 | -0.014990 |
| N  | -0.104416 | -0.167766 | 1.620285  |
| C  | -1.206038 | -0.135401 | 2.315538  |
| C  | -1.259100 | -0.342328 | 3.809233  |
| H  | -1.836958 | -1.248711 | 4.029097  |
| H  | -0.252237 | -0.440170 | 4.225647  |
| H  | -1.774811 | 0.503628  | 4.280481  |
| O  | -2.330441 | 0.077821  | 1.665004  |
| O  | -1.993520 | 1.392754  | -0.993707 |
| C  | 1.556270  | -0.817095 | -0.867460 |
| C  | 1.532036  | -1.110483 | -2.322517 |
| O  | 0.493646  | 0.098197  | -1.057866 |
| H  | 1.254631  | -1.670545 | -0.251674 |
| H  | 0.773629  | -1.786743 | -2.702496 |
| H  | 2.039950  | -0.440410 | -3.008861 |
| Br | -1.709562 | -2.277487 | -0.687278 |
| C  | 2.833827  | -0.200656 | -0.339264 |
| C  | 3.170177  | 1.125782  | -0.639086 |
| C  | 3.723497  | -0.969787 | 0.420262  |
| C  | 4.382126  | 1.666080  | -0.202520 |
| H  | 2.461832  | 1.731390  | -1.197630 |
| C  | 4.943440  | -0.437353 | 0.846253  |
| H  | 3.456176  | -1.991987 | 0.680560  |
| C  | 5.276402  | 0.885111  | 0.537743  |
| H  | 4.626633  | 2.700616  | -0.434819 |
| H  | 5.624537  | -1.048401 | 1.435160  |
| H  | 6.220143  | 1.306220  | 0.878066  |
| C  | -2.239778 | 2.671686  | -0.835341 |
| O  | -2.810574 | 3.358741  | -1.680412 |
| C  | -1.771256 | 3.275816  | 0.487325  |
| H  | -0.684273 | 3.164963  | 0.587607  |
| H  | -2.035459 | 4.335597  | 0.534087  |
| H  | -2.232250 | 2.735630  | 1.322105  |

(imaginary frequency: -630.00)  
(three lowest vibration frequency: 12.74, 17.97, 27.45)

TS-CHPh

|    |           |           |           |
|----|-----------|-----------|-----------|
| Fe | -1.437410 | -0.037055 | -0.037697 |
| N  | -2.064618 | 0.145358  | 1.795623  |
| C  | -3.153982 | 0.712742  | 1.361876  |
| C  | -4.269326 | 1.195393  | 2.262083  |
| H  | -4.445640 | 2.264612  | 2.088940  |
| H  | -5.197175 | 0.662964  | 2.016878  |
| H  | -4.018189 | 1.029238  | 3.313972  |
| O  | -3.290515 | 0.872449  | 0.061702  |
| O  | -0.697900 | 1.367287  | -1.181072 |
| C  | 0.825421  | -0.289646 | 1.883766  |
| C  | 1.979474  | -1.129011 | 1.502293  |
| O  | 0.289358  | -0.689988 | 0.643541  |
| H  | 0.238837  | -0.643431 | 2.737406  |
| H  | 1.873083  | -2.195101 | 1.685135  |
| Br | -2.049169 | -2.005356 | -1.290690 |
| C  | 3.169393  | -0.693571 | 0.829521  |
| C  | 4.194343  | -1.636853 | 0.564853  |
| C  | 3.378529  | 0.654660  | 0.440698  |
| C  | 5.391807  | -1.248492 | -0.027289 |
| H  | 4.035469  | -2.678130 | 0.837833  |
| C  | 4.575269  | 1.029595  | -0.162180 |
| H  | 2.583784  | 1.385157  | 0.567706  |
| C  | 5.590216  | 0.089843  | -0.392333 |
| H  | 6.168015  | -1.987085 | -0.215234 |
| H  | 4.713905  | 2.064408  | -0.466290 |
| H  | 6.521945  | 0.394802  | -0.863523 |
| C  | 0.126442  | 2.343398  | -0.972126 |
| C  | 0.309087  | 3.249581  | -2.191092 |
| H  | 0.676925  | 2.659004  | -3.038652 |
| H  | -0.659816 | 3.668677  | -2.486979 |
| H  | 1.010788  | 4.058605  | -1.970287 |
| O  | 0.741912  | 2.574703  | 0.079342  |
| H  | 1.001094  | 0.788222  | 1.949488  |

(imaginary frequency: -542.45)  
(three lowest vibration frequency: 13.61, 23.11, 30.94)

The Gibbs free energy of transition states complex TS-CH<sub>2</sub> (original “A”) in doublet, quartet, sextet, octet and dectet, as shown in the Table R1, and we set the Gibbs free energy of TS-CH<sub>2</sub> in doublet as 0.

| Multiplicity | Relative Gibbs free energy (kcal/mol) |
|--------------|---------------------------------------|
| Doublet (II) | 22.6                                  |
| Quartet (IV) | 8.1                                   |
| Sextet (VI)  | 0.0                                   |
| Octet (VIII) | 37.4                                  |
| Dectet (X)   | 136.8                                 |

According to DFT calculations, the A in sextet has the lowest Gibbs free energy, which means the sextet is the most stable spin configuration among the five cases.

## 6. Characterization Data of All Products

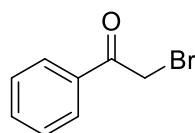

3a

**2-bromo-1-phenylethan-1-one (3a)**<sup>[1]</sup>: Prepared according to general procedure from 5. Yellow solid ( 30mg, 75% yield). <sup>1</sup>H NMR (400 MHz, CDCl<sub>3</sub>): δ= 7.99-7.97 (m, 2H), 7.62-7.58 (m, 1H), 7.50-7.47 (m, 2H), 4.45 (s, 2H). <sup>13</sup>C NMR (101 MHz, CDCl<sub>3</sub>): δ= 191.3, 134.0, 133.9, 128.9, 128.9, 31.0.

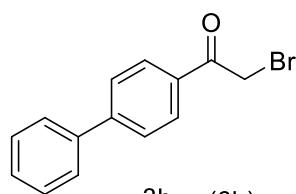

3b (6h)

**1-([1,1'-biphenyl]-4-yl)-2-bromoethan-1-one (3b)**<sup>[1]</sup>: Prepared according to general procedure from 5. Yellow solid ( 32mg, 59% yield). <sup>1</sup>H NMR (400 MHz, CDCl<sub>3</sub>): δ= 8.06-8.04 (m, 2H), 7.71-7.69 (m, 2H), 7.63-7.62 (m, 2H), 7.48-7.41 (m, 3H), 4.47 (s, 2H). <sup>13</sup>C NMR (101 MHz, CDCl<sub>3</sub>): δ= 190.9, 146.6, 139.5, 132.6, 129.6, 129.0, 128.5, 127.5, 127.3, 30.9.

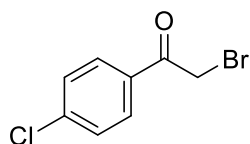

3c

**2-bromo-1-(4-chlorophenyl)ethan-1-one (3c)**<sup>[2]</sup>: Prepared according to general procedure from 5. Yellow solid ( 33mg, 70% yield). <sup>1</sup>H NMR (400 MHz, CDCl<sub>3</sub>): δ= 7.93-7.91 (m, 2H), 7.47-7.45 (m, 2H), 4.40 (s, 2H). <sup>13</sup>C NMR (101 MHz, CDCl<sub>3</sub>): δ= 190.2, 140.5, 132.2, 130.4, 129.2, 30.4.

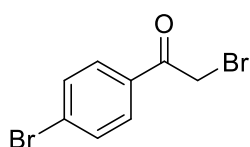

3d

**2-bromo-1-(4-bromophenyl)ethan-1-one (3d)**<sup>[2]</sup>: Prepared according to general procedure from 5. Yellow solid ( 40mg, 73% yield). <sup>1</sup>H NMR (400 MHz, CDCl<sub>3</sub>): δ= 7.82-7.80 (m, 2H), 7.61-7.60 (m, 2H), 4.38 (s, 2H). <sup>13</sup>C NMR (101 MHz, CDCl<sub>3</sub>): δ= 190.4, 132.6, 132.2, 130.4, 130.0, 30.5.

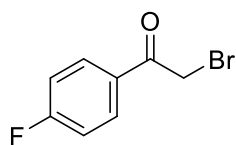

3e

**2-bromo-1-(4-fluorophenyl)ethan-1-one (3e)**<sup>[2]</sup>: Prepared according to general procedure from 5. Yellow solid ( 30mg, 69% yield). <sup>1</sup>H NMR (400 MHz, CDCl<sub>3</sub>): δ= 8.02-8.00 (m, 2H), 7.99-7.12 (m, 2H), 4.40 (s, 2H). <sup>13</sup>C NMR (101 MHz, CDCl<sub>3</sub>): δ= 189.82, 166.1 (d, *J*= 255Hz), 131.7 (d, *J*= 9Hz), 130.3 (d, *J*= 3Hz), 116.1 (d, *J*= 22Hz), 30.5.

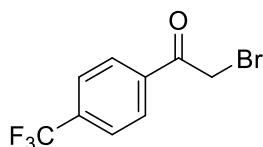

3f

**2-bromo-1-(4-(trifluoromethyl)phenyl)ethan-1-one (3f)**<sup>[3]</sup>: Prepared according to general procedure from 5. Yellow solid ( 34mg, 64% yield). <sup>1</sup>H NMR (400 MHz,

CDCl<sub>3</sub>):  $\delta$ = 8.09-8.07 (m, 2H), 7.75-7.74 (m, 2H), 4.44 (s, 2H). <sup>13</sup>C NMR (101 MHz, CDCl<sub>3</sub>):  $\delta$ = 190.4, 136.5, 129.3, 128.9, 125.9, 122.0, 30.4.

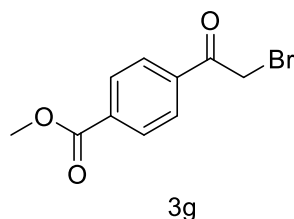

**methyl 4-(2-bromoacetyl)benzoate (3g)**<sup>[4]</sup>: Prepared according to general procedure from 5. Yellow solid (30mg, 59% yield). <sup>1</sup>H NMR (400 MHz, CDCl<sub>3</sub>):  $\delta$ = 8.13-8.11 (m, 2H), 8.02-8.00 (m, 2H), 4.45 (s, 2H), 3.93 (s, 3H). <sup>13</sup>C NMR (101 MHz, CDCl<sub>3</sub>):  $\delta$ = 190.8, 165.9, 137.1, 134.6, 130.1, 128.8, 52.6, 30.7.

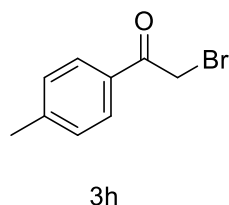

**2-bromo-1-(p-tolyl)ethan-1-one (3h)**<sup>[2]</sup>: Prepared according to general procedure from 5. Yellow solid (29mg, 67% yield). <sup>1</sup>H NMR (400 MHz, CDCl<sub>3</sub>):  $\delta$ = 7.88-7.86 (m, 2H), 7.28-7.27 (m, 2H), 4.42 (s, 2H), 2.41 (s, 3H). <sup>13</sup>C NMR (101 MHz, CDCl<sub>3</sub>):  $\delta$ = 191.0, 145.0, 131.4, 129.6, 129.0, 31.0, 21.8.

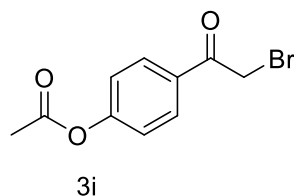

**4-(2-bromoacetyl)phenyl acetate (3i)**<sup>[4]</sup>: Prepared according to general procedure from 5. Yellow solid (33mg, 65% yield). <sup>1</sup>H NMR (400 MHz, CDCl<sub>3</sub>):  $\delta$ = 8.02-8.00 (m, 2H), 7.23-7.21 (m, 2H), 4.42 (s, 2H), 2.32 (s, 3H). <sup>13</sup>C NMR (101 MHz, CDCl<sub>3</sub>):  $\delta$ = 190.1, 168.7, 154.9, 131.4, 130.6, 122.1, 30.7, 21.2.

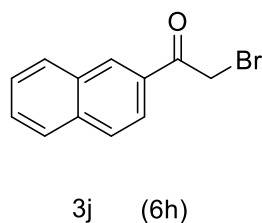

**2-bromo-1-(naphthalen-2-yl)ethan-1-one (3j)**<sup>[1]</sup>: Prepared according to general procedure from 5. Yellow solid (30mg, 60% yield). <sup>1</sup>H NMR (400 MHz, CDCl<sub>3</sub>):  $\delta$ = 8.50-8.49 (m, 1H), 8.02-7.87 (m, 4H), 7.64-7.57 (m, 2H), 4.57 (s, 2H). <sup>13</sup>C NMR (101

MHz, CDCl<sub>3</sub>):  $\delta$ = 191.3, 135.9, 132.4, 131.2, 131.0, 129.7, 129.0, 128.8, 127.8, 127.1, 124.1, 31.0.

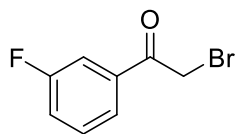

3k

**2-bromo-1-(3-fluorophenyl)ethan-1-one (3k)**<sup>[5]</sup>: Prepared according to general procedure from 5. Yellow solid (30mg, 68% yield). <sup>1</sup>H NMR (400 MHz, CDCl<sub>3</sub>):  $\delta$ = 7.83-7.78 (m, 2H), 7.46-7.36 (m, 3H), 4.98 (s, 1H), 3.51 (s, 6H). <sup>13</sup>C NMR (101 MHz, CDCl<sub>3</sub>):  $\delta$ = 190.1, 162.8 (d, *J*= 248Hz), 135.87 (d, *J*= 6Hz), 130.6 (d, *J*= 8Hz), 124.7 (d, *J*= 3Hz), 121.1 (d, *J*= 22Hz), 115.6 (d, *J*= 22Hz), 30.6.

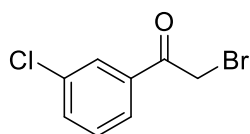

3l

**2-bromo-1-(3-chlorophenyl)ethan-1-one (3l)**<sup>[5]</sup>: Prepared according to general procedure from 5. Yellow solid (30mg, 64% yield). <sup>1</sup>H NMR (400 MHz, CDCl<sub>3</sub>):  $\delta$ = 7.95-7.92 (m, 1H), 7.85-7.84 (m, 1H), 7.59-7.57 (m, 1H), 7.46-7.42 (m, 1H), 4.42 (s, 2H). <sup>13</sup>C NMR (101 MHz, CDCl<sub>3</sub>):  $\delta$ = 190.1, 135.4, 135.2, 133.9, 130.2, 128.9, 127.0, 30.5.

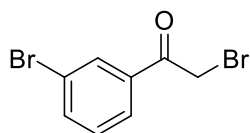

3m

**2-bromo-1-(3-bromophenyl)ethan-1-one (3m)**<sup>[3]</sup>: Prepared according to general procedure from 5. Yellow solid (36mg, 65% yield). <sup>1</sup>H NMR (400 MHz, CDCl<sub>3</sub>):  $\delta$ = 8.09 (s, 1H), 7.89-7.87 (m, 1H), 7.73-7.71 (m, 1H), 7.38-7.34 (m, 1H), 4.40 (s, 2H). <sup>13</sup>C NMR (101 MHz, CDCl<sub>3</sub>):  $\delta$ = 190.0, 136.8, 135.6, 131.9, 130.4, 127.5, 123.2, 30.5.

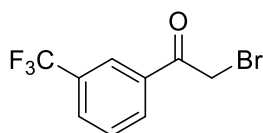

3n

**2-bromo-1-(3-(trifluoromethyl)phenyl)ethan-1-one (3n)**<sup>[6]</sup>: Prepared according to general procedure from 5. Yellow solid (28mg, 53% yield). <sup>1</sup>H NMR (400 MHz, CDCl<sub>3</sub>):  $\delta$ = 8.24-8.23 (m, 1H), 8.19-8.17 (m, 1H), 7.88-7.86 (m, 1H), 7.68-7.64 (m, 1H), 4.46 (s, 2H). <sup>13</sup>C NMR (101 MHz, CDCl<sub>3</sub>):  $\delta$ = 190.1, 134.4, 132.1, 130.3, 129.6,

128.4, 128.1, 125.8, 30.2.

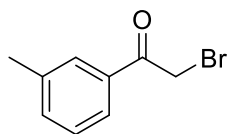

3o

**2-bromo-1-(m-tolyl)ethan-1-one (3o)**<sup>[3]</sup>: Prepared according to general procedure from 5. Yellow solid ( 23mg, 53% yield). <sup>1</sup>H NMR (400 MHz, CDCl<sub>3</sub>): δ= 7.77-7.76 (m, 2H), 7.40-7.36 (m, 2H), 4.43 (s, 2H), 2.40 (s, 3H). <sup>13</sup>C NMR (101 MHz, CDCl<sub>3</sub>): δ= 191.5, 138.8, 134.7, 134.0, 129.3, 128.7, 126.1, 31.1, 21.3.

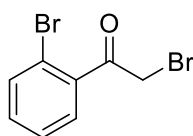

3p

**2-bromo-1-(2-bromophenyl)ethan-1-one (3p)**<sup>[3]</sup>: Prepared according to general procedure from 5. Yellow solid ( 23mg, 36% yield). <sup>1</sup>H NMR (400 MHz, CDCl<sub>3</sub>): δ= 7.63-7.61 (m, 1H), 7.47-7.45 (m, 1H), 7.41-7.34 (m, 2H), 4.48 (s, 2H). <sup>13</sup>C NMR (101 MHz, CDCl<sub>3</sub>): δ= 194.9, 138.6, 133.7, 132.49, 129.7, 127.6, 119.1, 33.9.

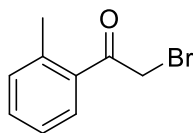

3q

**2-bromo-1-(o-tolyl)ethan-1-one (3q)**<sup>[6]</sup>: Prepared according to general procedure from 5. Yellow solid ( 14mg, 27% yield). <sup>1</sup>H NMR (400 MHz, CDCl<sub>3</sub>): δ= 7.66-7.64 (m, 1H), 7.41-7.39 (m, 1H), 7.29-7.25 (m, 2H), 4.40 (m, 2H), 2.51 (s, 3H). <sup>13</sup>C NMR (101 MHz, CDCl<sub>3</sub>): δ= 194.2, 139.7, 134.4, 132.3, 132.3, 129.0, 125.8, 33.7, 21.4.

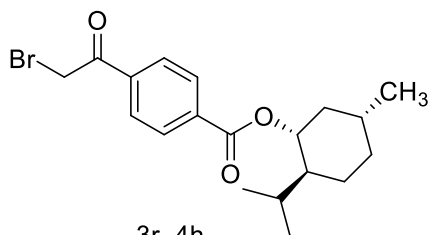

3r, 4h

from DL-Menthol

**(1R,2S,5R)-2-isopropyl-5-methylcyclohexyl 4-(2-bromoacetyl)benzoate (3r):**

Prepared according to general procedure from 5. Yellow solid (37mg, 44% yield). <sup>1</sup>H NMR (400 MHz, CDCl<sub>3</sub>): δ= 8.14-8.12 (m, 2H), 8.03-8.01 (m, 2H), 4.97-4.91 (m, 1H), 4.45 (s, 2H), 2.12-2.09 (m, 1H), 1.92 (m, 1H), 1.73-1.71 (m, 2H), 1.58-1.53 (m, 2H), 1.14-1.09 (m, 2H), 0.91 (m, 7H), 0.78-0.77 (m, 3H).

<sup>13</sup>C NMR (101 MHz, CDCl<sub>3</sub>): δ= 190.9, 164.9, 136.9, 135.3, 130.0, 128.8, 75.6, 47.2, 40.8, 34.2, 31.4, 30.7, 26.5, 23.6, 22.0, 20.7, 16.5.

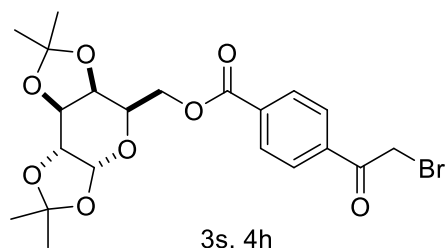

from Diacetonefructose

**((3aR,5R,5aS,8aS,8bR)-2,2,7,7-tetramethyltetrahydro-5H-bis([1,3]dioxolo)[4,5-b:4',5'-d]pyran-5-yl)methyl 4-(2-bromoacetyl)benzoate (3s):** Prepared according to general procedure from 5. Yellow solid (39mg, 45% yield). <sup>1</sup>H NMR (400 MHz, CDCl<sub>3</sub>): δ= 8.17-8.15 (m, 2H), 8.03-8.01 (m, 2H), 4.70-4.61 (m, 2H), 4.45 (s, 2H), 4.42-4.41 (m, 1H), 4.34-4.32 (m, 1H), 4.25-4.23 (m, 1H), 3.94-3.91 (m, 1H), 3.79-3.76 (m, 1H), 1.52 (s, 3H), 1.43 (s, 3H), 1.33-1.32 (m, 6H). <sup>13</sup>C NMR (101 MHz, CDCl<sub>3</sub>): δ= 190.8, 164.8, 137.2, 134.3, 130.2, 128.9, 109.1, 108.9, 101.5, 70.7, 70.6, 70.0, 65.9, 61.3, 30.7, 26.5, 25.9, 25.4, 24.0.

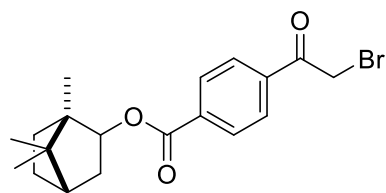

**(1S,4S)-1,7,7-trimethylbicyclo[2.2.1]heptan-2-yl 4-(2-bromoacetyl)benzoate (3t):** Prepared according to general procedure from 5. Yellow solid (40mg, 48% yield). <sup>1</sup>H NMR (400 MHz, CDCl<sub>3</sub>): δ= 8.16-8.14 (m, 2H), 8.05-8.02 (m, 2H), 5.13-5.11 (m, 1H), 4.45 (s, 2H), 2.50-2.45 (m, 2H), 2.11-2.07 (m, 1H), 1.84-1.74 (m, 2H), 1.44-1.26 (m, 3H), 1.13-1.07 (m, 1H), 0.95 (s, 3H), 0.90 (s, 6H). <sup>13</sup>C NMR (101 MHz, CDCl<sub>3</sub>): δ= 190.8, 165.6, 137.0, 135.32, 129.9, 128.9, 81.3, 49.1, 47.9, 44.9, 36.9, 30.7, 28.1, 27.4, 19.7, 18.9, 13.6.

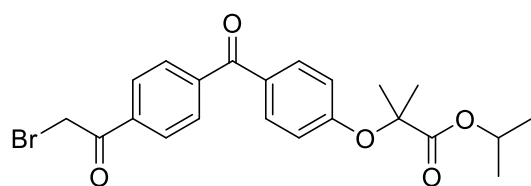

3u, 3h  
from Fenofibrate

**isopropyl 2-(4-(4-(2-bromoacetyl)benzoyl)phenoxy)-2-methylpropanoate (3u):**

Prepared according to general procedure from 5. Yellow solid ( 31mg, 35% yield). <sup>1</sup>H NMR (400 MHz, CDCl<sub>3</sub>): δ= 8.07-8.02 (m, 2H), 7.82-7.73 (m, 4H), 6.86-6.84 (m, 2H), 5.10-5.04 (m, 1H), 4.47 (s, 2H), 1.65 (s, 6H), 1.19 (d, *J*= 4Hz,6H). <sup>13</sup>C NMR (101 MHz, CDCl<sub>3</sub>): δ= 194.3, 190.8, 173.0, 160.1, 142.7, 136.0, 132.1, 129.8, 128.8, 128.4, 117.2, 79.5, 69.4, 30.7, 25.3, 21.5.

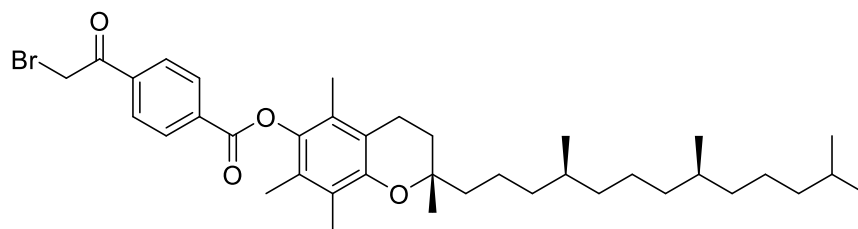

3v, 2h from D-Tocopherol

**(S)-2,5,7,8-tetramethyl-2-((4S,8S)-4,8,12-trimethyltridecyl)chroman-6-yl**

**4-(2-bromoacetyl)benzoate (3v):**

Prepared according to general procedure from 5. Yellow solid ( 40mg, 30% yield). <sup>1</sup>H NMR (400 MHz, CDCl<sub>3</sub>): δ= 8.36-8.34 (m, 2H), 8.12-8.10 (m, 2H), 4.48 (s, 2H), 2.61-2.60 (m, 2H), 2.11-2.00 (m, 8H), 1.82-1.79 (m, 1H), 1.70-1.08 (m, 24H), 0.86-0.84 (m, 11H). <sup>13</sup>C NMR (101 MHz, CDCl<sub>3</sub>): δ= 190.8, 164.1, 161.4, 140.4, 137.5, 134.1, 133.4, 130.5, 129.1, 124.9, 123.3, 117.6, 75.2, 39.4, 37.4, 37.3, 32.8, 30.6, 29.7, 28.0, 26.5, 24.8, 24.4, 22.7, 22.6, 21.0, 20.6, 19.7, 19.7, 13.1, 12.2, 11.9.

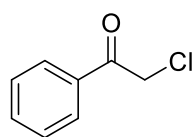

3w

**2-chloro-1-phenylethan-1-one (3w)<sup>[3]</sup>:**

Prepared according to general procedure from 5. Yellow solid ( 16mg, 51% yield). <sup>1</sup>H NMR (400 MHz, CDCl<sub>3</sub>): δ= 7.96-7.94 (m, 1H), 7.61-7.59 (m, 1H), 7.51-7.47 (m, 2H), 4.71 (m, 2H). <sup>13</sup>C NMR (101 MHz, CDCl<sub>3</sub>): δ= 191.1, 134.2, 134.0, 128.9, 128.5, 46.0.



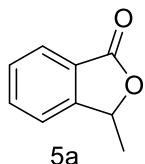

**3-methylisobenzofuran-1(3H)-one (5a)**<sup>[6]</sup>: The title compound was prepared according to the general procedure A, Colorless oil (38.5 mg, 66% yield). <sup>1</sup>H NMR (400 MHz, CDCl<sub>3</sub>) δ 7.95-7.85 (m, 1H), 7.71-7.62 (m, 1H), 7.56-.39 (m, 2H), 5.56 (q, J = 6.3 Hz, 1H), 1.63 (d, J = 6.7 Hz, 3H); <sup>13</sup>C{<sup>1</sup>H}NMR (100 MHz, CDCl<sub>3</sub>) δ 170.5, 151.2, 134.1, 129.0, 125.5, 125.4, 121.7, 77.8, 20.3; IR (cm<sup>-1</sup>): 3063, 2982 1760, 1467, 1347, 1287, 1045, 763; HRMS (ESI-TOF): ([M+H]<sup>+</sup>) calcd for C<sub>10</sub>H<sub>11</sub>O<sub>2</sub><sup>+</sup>: 149.0603, found: 149.0609.

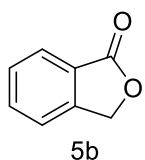

**isobenzofuran-1(3H)-one (5b)**<sup>[6]</sup>: The title compound was prepared according to the general procedure A. White solid (32.3 mg, 60% yield). <sup>1</sup>H NMR (400 MHz, CDCl<sub>3</sub>) δ 7.93-7.84 (m, 1H), 7.72-7.63 (m, 1H), 7.55-7.44 (m, 2H), 5.29 (s, 2H); <sup>13</sup>C{<sup>1</sup>H}NMR (100 MHz, CDCl<sub>3</sub>) δ 171.1, 146.5, 134.0, 129.0, 125.7, 125.6, 122.0, 69.7; IR (cm<sup>-1</sup>):1758, 1623, 1599, 1469, 1439, 1357, 1310, 1280, 1227, 1050, 1033, 997, 737; HRMS (ESI-TOF): ([M+H]<sup>+</sup>) calcd for C<sub>8</sub>H<sub>7</sub>O<sub>2</sub><sup>+</sup>: 135.0446; found: 135.0445.

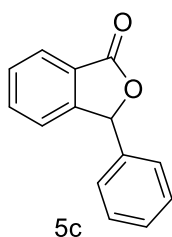

**3-phenylisobenzofuran-1(3H)-one (5c)**<sup>[6]</sup>: The title compound was prepared according to the general procedure. Yellow solid (57.4 mg, 68% yield). <sup>1</sup>H NMR (400 MHz, CDCl<sub>3</sub>) δ 8.04-7.93 (m, 1H), 7.73-7.61 (m, 1H), 7.61-7.51 (m, 1H), 7.43-7.16 (m, 7H), 6.41 (s, 1H); <sup>13</sup>C{<sup>1</sup>H}NMR (100 MHz, CDCl<sub>3</sub>) δ 170.5, 149.7, 136.4, 134.3, 129.4, 129.3, 129.0, 127.0, 125.7, 125.56, 122.9, 82.7; IR (cm<sup>-1</sup>): 2963, 1734, 1640, 1599, 1457, 1292, 1068, 967, 725; HRMS (ESI-TOF): ([M+H]<sup>+</sup>) calcd for C<sub>14</sub>H<sub>11</sub>O<sub>2</sub><sup>+</sup>: 211.0759; found: 211.0756.

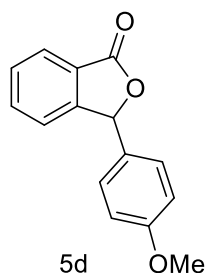

**3-(4-methoxyphenyl)isobenzofuran-1(3H)-one(5d)**<sup>[6]</sup>: The title compound was prepared according to the general procedure. Yellow solid (75.0 mg, 78% yield). <sup>1</sup>H NMR (400 MHz, CDCl<sub>3</sub>) δ 7.31-7.26 (m, 4H), 7.22-7.14 (m, 2H), 7.14-7.10 (m, 2H), 6.27 (s, 1H), 3.79 (s, 1H); <sup>13</sup>C{<sup>1</sup>H}NMR (100 MHz, CDCl<sub>3</sub>) δ 170.7, 160.8, 142.2, 136.6, 129.3, 129.0, 127.0, 123.8, 123.3, 107.3, 82.7, 55.8.

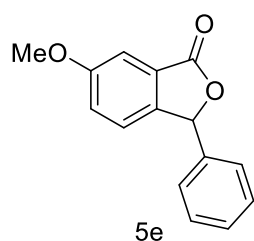

**6-methoxy-3-phenylisobenzofuran-1(3H)-one(5e)**<sup>[7]</sup>: The title compound was prepared according to the general procedure. Yellow solid (70.1 mg, 73% yield). <sup>1</sup>H NMR (400 MHz, CDCl<sub>3</sub>) δ 7.91-7.84 (m, 1H), 7.61-7.54 (m, 1H), 7.53-7.45 (m, 1H), 7.27-7.21 (m, 1H), 7.11-7.05 (m, 2H), 6.84-6.78 (m, 2H), 6.29 (s, 1H), 3.72 (s, 3H); <sup>13</sup>C{<sup>1</sup>H}NMR (100 MHz, CDCl<sub>3</sub>) δ 170.6, 160.4, 149.8, 134.3, 129.3, 128.8, 128.3, 125.9, 125.6, 123.0, 114.3, 82.8, 55.4.

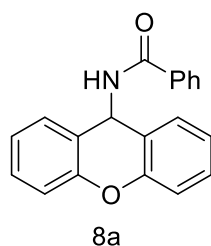

**N-(9H-xanthen-9-yl)benzamide (8a)**<sup>[8]</sup>: The title compound was prepared according to the general procedure. White Solid.(53.01 mg, 88%; eluent: 25%-50% Dichloromethane/ Petroleum ether); m.p. = 235-237 °C; <sup>1</sup>H NMR (400 MHz, DMSO) δ (ppm) = 9.47 (d, *J* = 8.5 Hz, 1H), 7.92 (d, *J* = 7.5 Hz, 2H), 7.52 (t, *J* = 7.0 Hz, 1H), 7.45 (d, *J* = 7.4 Hz, 2H), 7.40 (d, *J* = 7.6 Hz, 2H), 7.33 (t, *J* = 7.6 Hz, 2H), 7.17 (d, *J* = 8.2 Hz, 2H), 7.13 (t, *J* = 7.4 Hz, 2H), 6.56 (d, *J* = 8.4 Hz, 1H); <sup>13</sup>C NMR (100 MHz, DMSO) δ (ppm) = 166.26, 151.05, 134.31, 131.92, 129.45, 129.39, 128.73, 127.97, 123.92, 122.20, 116.59, 43.51; IR(KBr): 3446, 3328, 1629, 1578, 1518, 1481, 1458, 1333, 1259, 1212, 751 cm<sup>-1</sup>; HRMS (ESI) for C<sub>20</sub>H<sub>15</sub>NO<sub>2</sub>Na[M+Na]<sup>+</sup> calcd. 324.1000, found 324.1013.

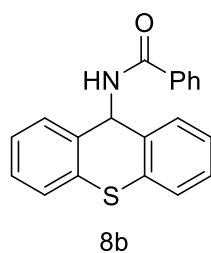

***N*-(9H-thioxanthen-9-yl)benzamide (8b)**<sup>18</sup>: The title compound was prepared according to the general procedure. Yellow Solid.(50.7 mg, 80%; eluent: 25%-50% Dichloromethane/ Petroleum ether); m.p. = 180-181 °C; <sup>1</sup>H NMR (400 MHz, CDCl<sub>3</sub>) δ (ppm) = 7.66 (d, *J* = 6.7 Hz, 2H), 7.62 (s, 2H), 7.44-7.49(m, 2H), 7.39 (d, *J* = 5.8 Hz, 1H), 7.29-7.34 (m, 2H), 7.22-7.28 (m, 4H), 7.03 (d, *J* = 6.9 Hz, 1H), 6.45 (d, *J* = 7.7 Hz, 1H); <sup>13</sup>C NMR (100 MHz, CDCl<sub>3</sub>) δ (ppm) = 166.36, 134.85, 134.00, 132.90, 131.58, 129.26, 128.46, 127.83, 127.14, 127.03, 127.01, 53.74; IR(KBr): 3448, 1641, 1530, 1458, 1384, 731,696 cm<sup>-1</sup>; HRMS (ESI) for C<sub>20</sub>H<sub>15</sub>NSONa[M+Na]<sup>+</sup> calcd. 340.0772, found 340.0770.

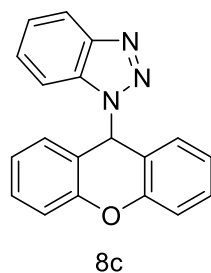

**1-(9H-xanthen-9-yl)-1H-benzo[d][1,2,3]triazole (8c)**<sup>19</sup>: The title compound was prepared according to the general procedure. White Solid.(43.66 mg,73%; eluent: 25%-50% Dichloromethane/ Petroleum ether); m.p.=215-216 °C; <sup>1</sup>H NMR (400 MHz, CDCl<sub>3</sub>) δ (ppm) = 7.97 (d, *J* = 7.6 Hz, 1H), 7.58 (s, 1H), 7.32 (d, *J* = 6.8 Hz, 2H), 7.25 (d, *J* = 8.2 Hz, 2H), 7.19 (d, *J* = 4.4 Hz, 3H), 7.13 (d, *J* = 6.6 Hz, 1H), 7.00 (d, *J* = 5.6 Hz, 2H), 6.82 (d, *J* = 7.8 Hz, 1H); <sup>13</sup>C NMR (100 MHz, CDCl<sub>3</sub>) δ (ppm) = 150.97, 146.87, 130.44, 129.30, 127.35, 123.96 (d, *J* = 8.1 Hz), 119.97, 117.02, 116.80, 110.10, 55.36; HRMS (ESI) for C<sub>19</sub>H<sub>13</sub>N<sub>3</sub>ONa[M+Na]<sup>+</sup> calcd. 322.0956, found 322.0970.

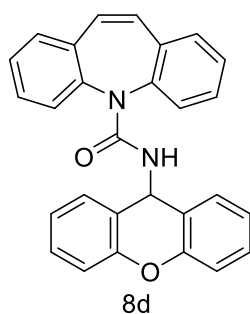

***N*-(9H-xanthen-9-yl)-5H-dibenzo[b,f]azepine-5-carboxamide (8d)<sup>[10]</sup>:** The title compound was prepared according to the general procedure. Yellow Solid.(62.42 mg, 75%; eluent: 25%-50% Dichloromethane/ Petroleum ether); m.p.=209-210 °C; <sup>1</sup>H NMR (400 MHz, CDCl<sub>3</sub>) δ (ppm) = 7.47-7.55 (m, 4H), 7.39-7.43 (m, 2H), 7.34-7.37 (m, 2H), 7.27-7.32 (m, 2H), 7.22-7.26 (m, 2H), 7.09-7.15 (m, 2H), 7.0-7.05 (m, 2H), 6.93-6.99 (m, 2H), 6.41 (d, *J* = 8.7 Hz, 1H), 4.87 (d, *J* = 8.4 Hz, 1H); <sup>13</sup>C NMR (100 MHz, CDCl<sub>3</sub>) δ (ppm) = 156.47, 150.69, 139.78, 135.22, 130.45, 129.67, 129.55, 129.15, 129.06, 128.89, 127.85, 123.35, 121.76, 116.37, 44.79; IR(KBr): 3652, 3397, 1655, 1637, 1483, 1457, 1435, 1336, 1257, 1210, 744 cm<sup>-1</sup>; HRMS (ESI) for C<sub>16</sub>H<sub>15</sub>NO<sub>3</sub>SNa[M+Na]<sup>+</sup> calcd. 439.1244, found 439.1435.

## 7. Reference

- [1] S. Bishi, M. Kar, T. K. Mandal, D. Sarkar. *Catal. Sci. Technol.*, **2024**,14, 2503-2513.
- [2] A. Gonzalez-de-Castro, Xiao, J.-L. *J. Am. Chem. Soc.*, **2015**, 137, 25, 8206–8218.
- [3] Zeng, M., Huang, R.-X., Li, W.-Y., Liu, X.-W., He, F.-L., Zhang Y.-Y., Xiao, F., *Tetrahedron.*, **2016**, 72, 3818-3822.
- [4] A. Chandra, K. N. Parida, J. N. Moorthy, *Tetrahedron.*,**2017**,50, 5827-5832.
- [5] I. H. Shah, S. Kumar, J. Kumar, S. Raheem, M. A. Rizvi, B. A. Shah, *ChemPhotoChem.*, **2022**, 6, e202100231.Wang, H., Zheng, M.-X., Guo, H., Huang, G., Cheng, Z., Rexit, A.A. *Eur. J. Org. Chem.*, **2020**, 41, 6455-6458.
- [6] Chen, Y., Zhang, J.-Y., Du, H.-G., Luo, S.-S., Xu, J.X., Yang, Z.-X.. *Org. Chem. Front.*, **2024**,11, 2220-2230.
- [7] H. Miura, S. Terajima, T. Shishido. *ACS Catal.*, **2018**, 8, 6246-6254.
- [8] Li, F.-Y., Liang, Y.-T., Zhan, X., Zhang, S., Li, M.-B. *Org. Chem. Front.*, **2022**,9, 5571-5577.
- [9] Shao, X., Tian, L., Wang, Y. *Eur. J. Org. Chem.*, **2019**, 25, 4089-4094.
- [10] Li, F.-Y., Liu, Ke., Sun, Q., Zhang, S., Li, M.-B., *SynOpen.*, **2023**, 7, 491-495.

## 8. Spectra of All Products

$^{13}\text{C}$  NMR (101 MHz,  $\text{CDCl}_3$ ) 3a

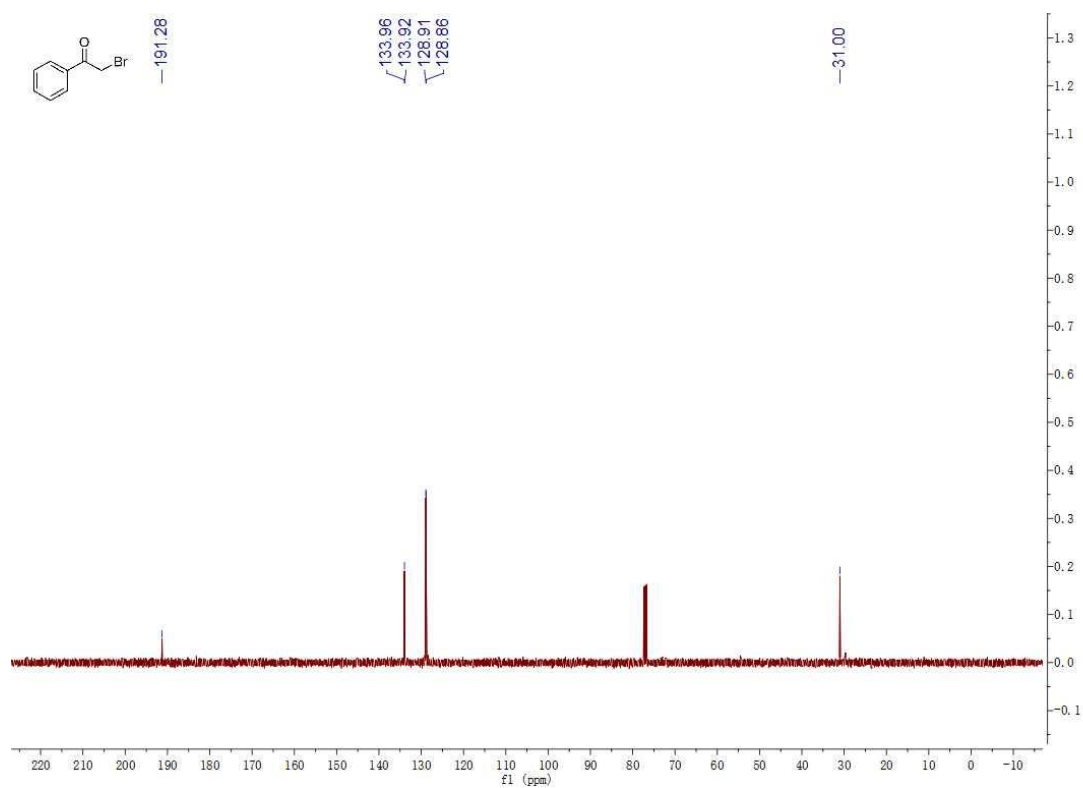

$^1\text{H}$  NMR (400 MHz,  $\text{CDCl}_3$ ) 3a

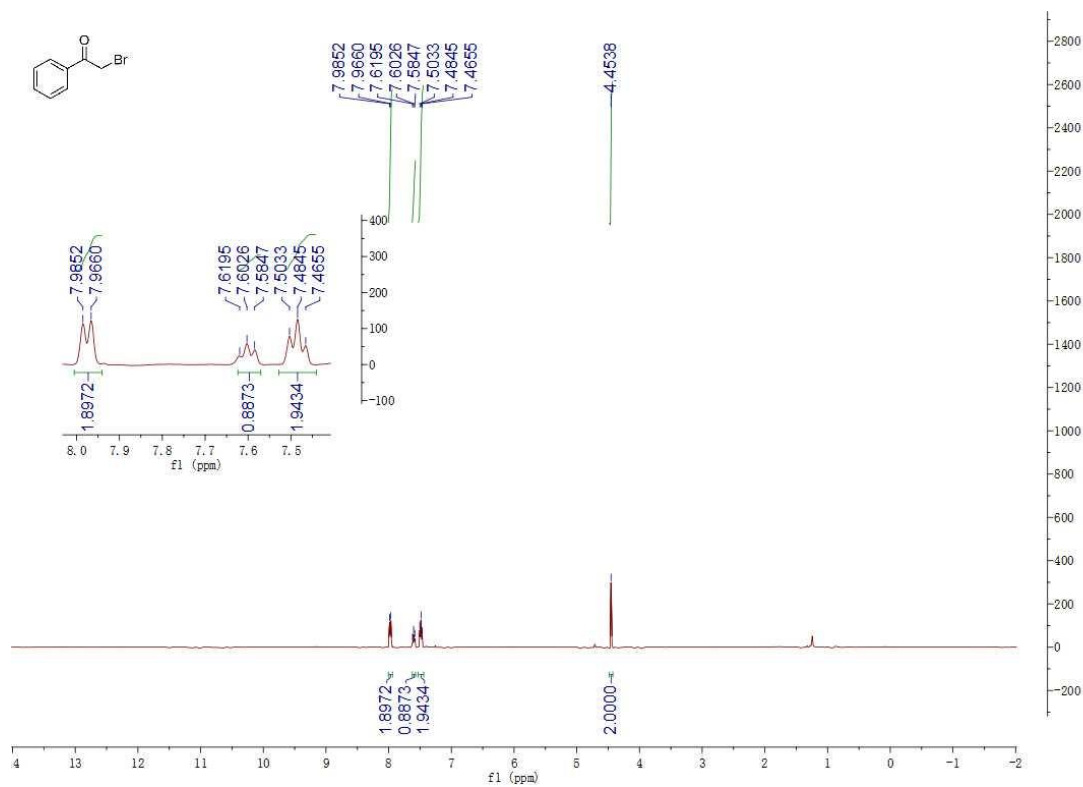

<sup>13</sup>C NMR (101 MHz, CDCl<sub>3</sub>) 3b

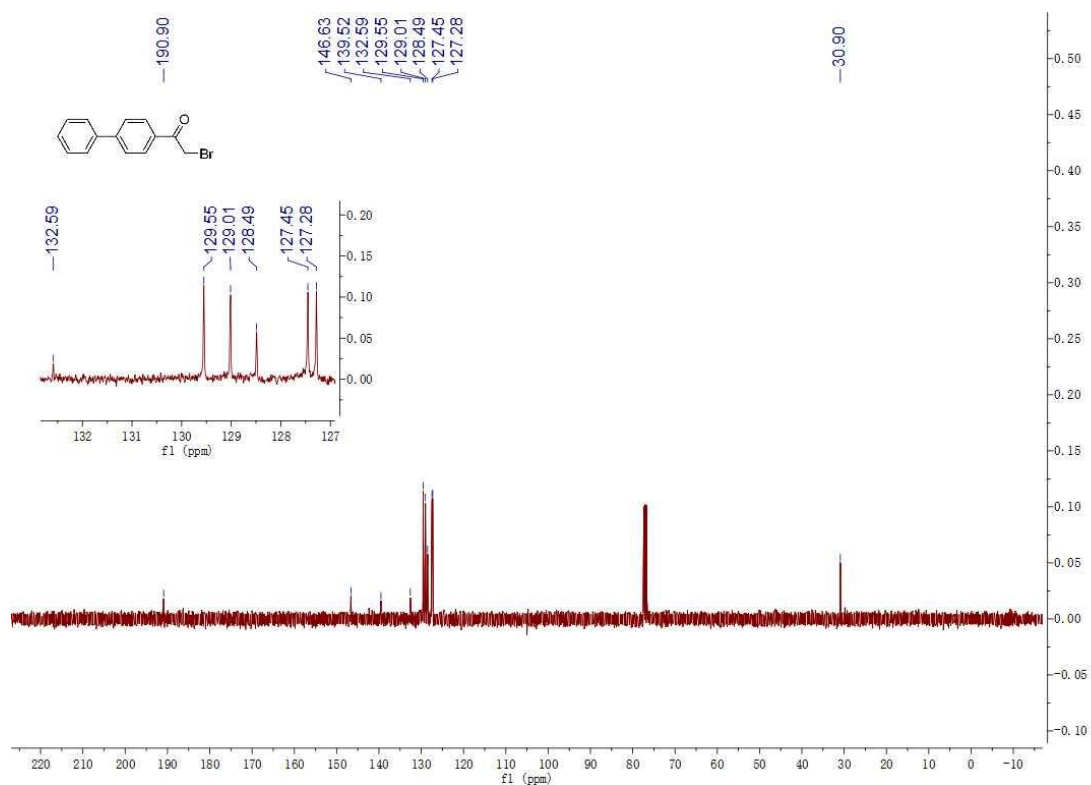

<sup>1</sup>H NMR (400 MHz, CDCl<sub>3</sub>) 3b

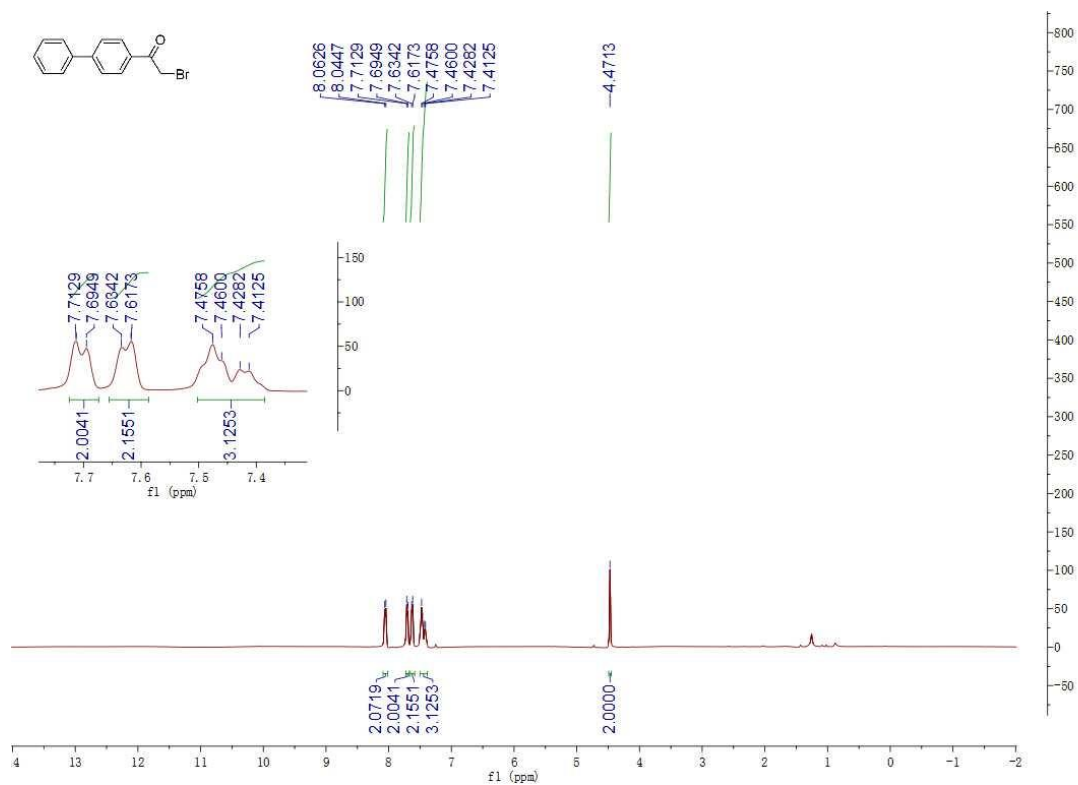

$^{13}\text{C}$  NMR (101 MHz,  $\text{CDCl}_3$ ) 3c

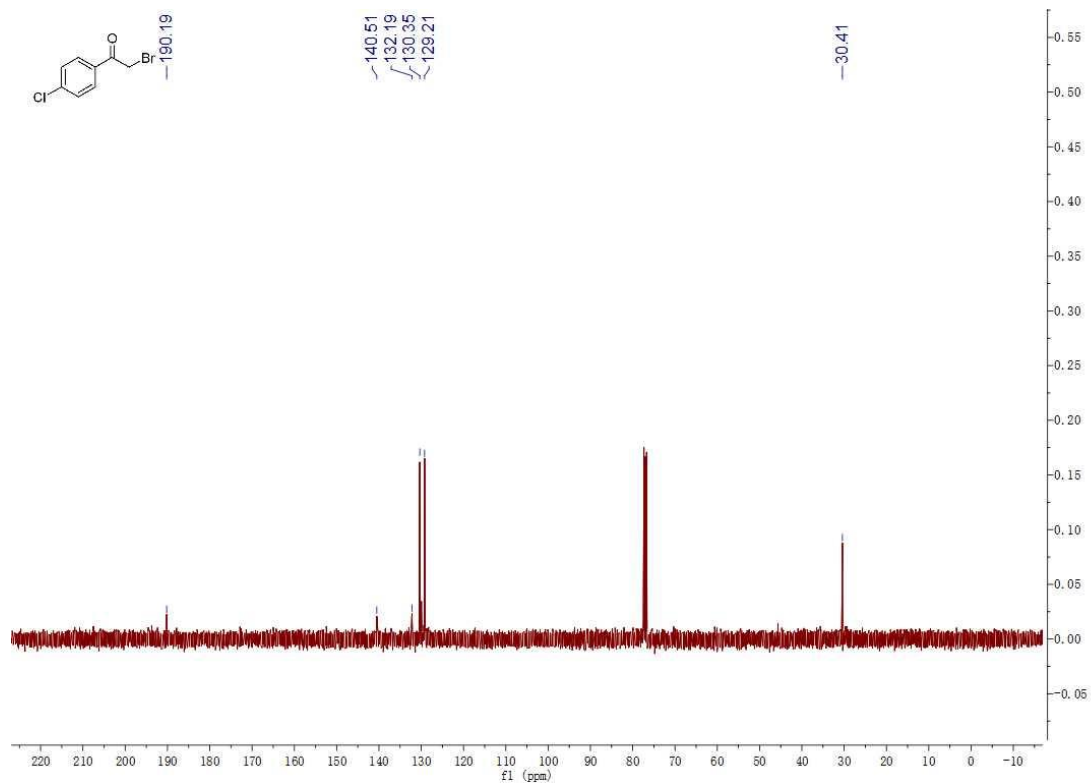

$^1\text{H}$  NMR (400 MHz,  $\text{CDCl}_3$ ) 3c

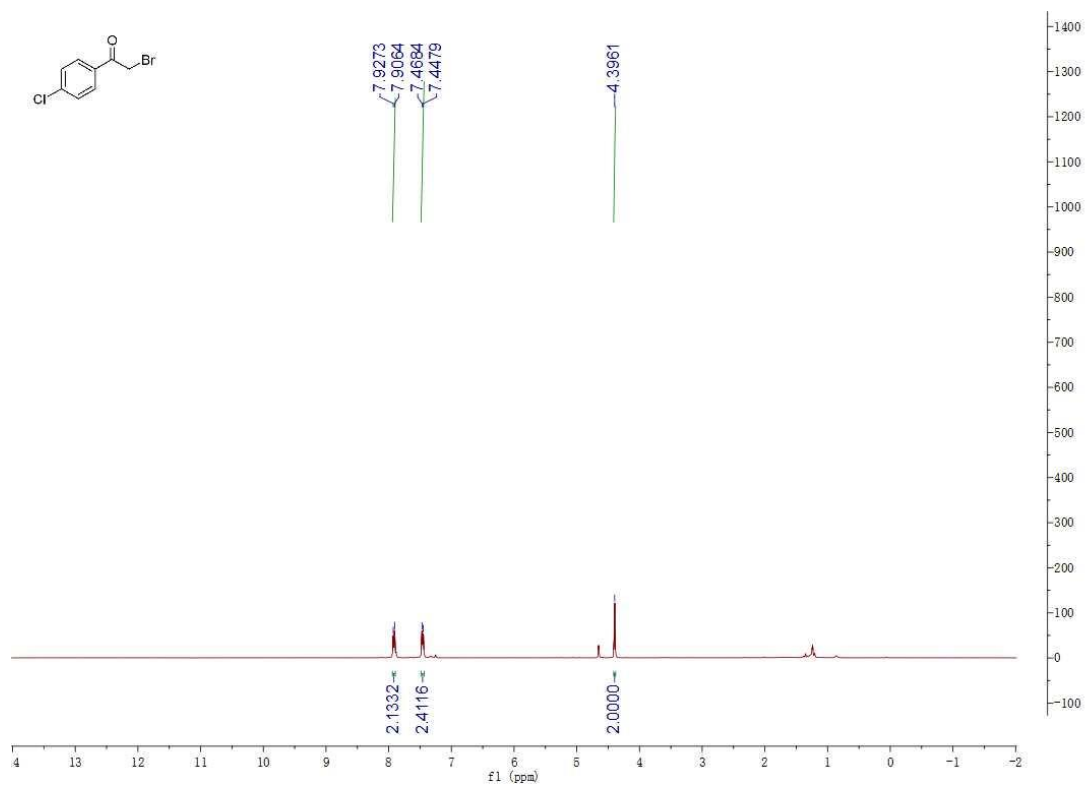

$^{13}\text{C}$  NMR (101 MHz,  $\text{CDCl}_3$ ) 3d

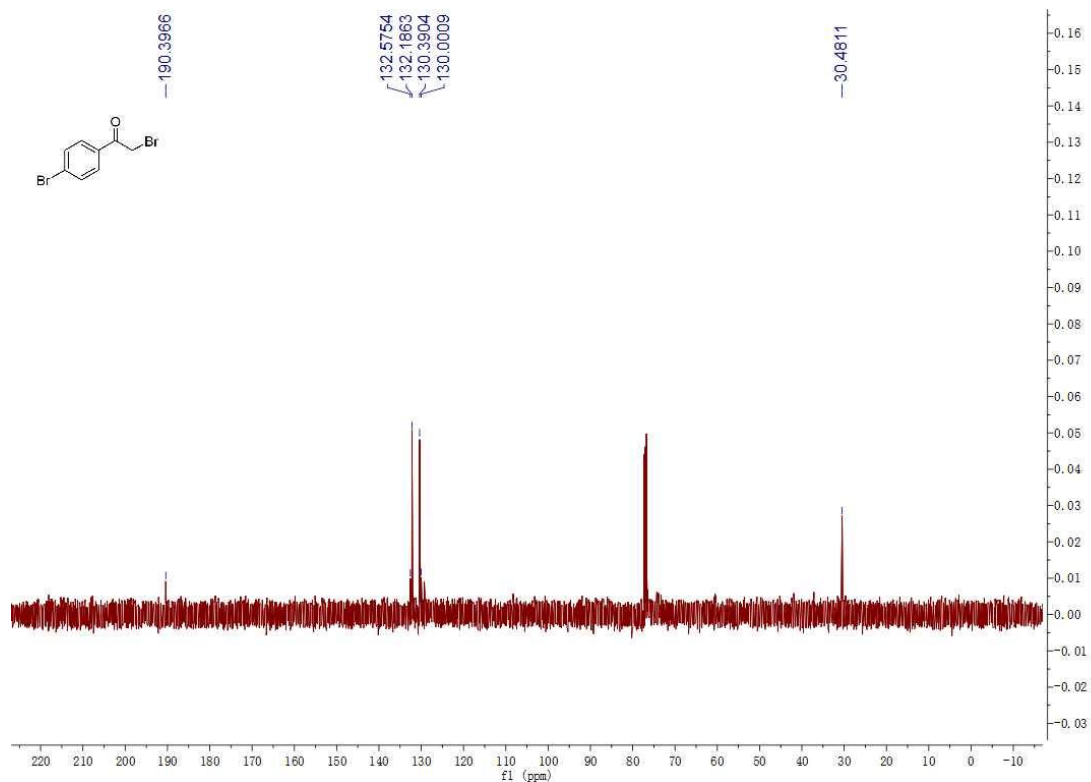

$^1\text{H}$  NMR (400 MHz,  $\text{CDCl}_3$ ) 3d

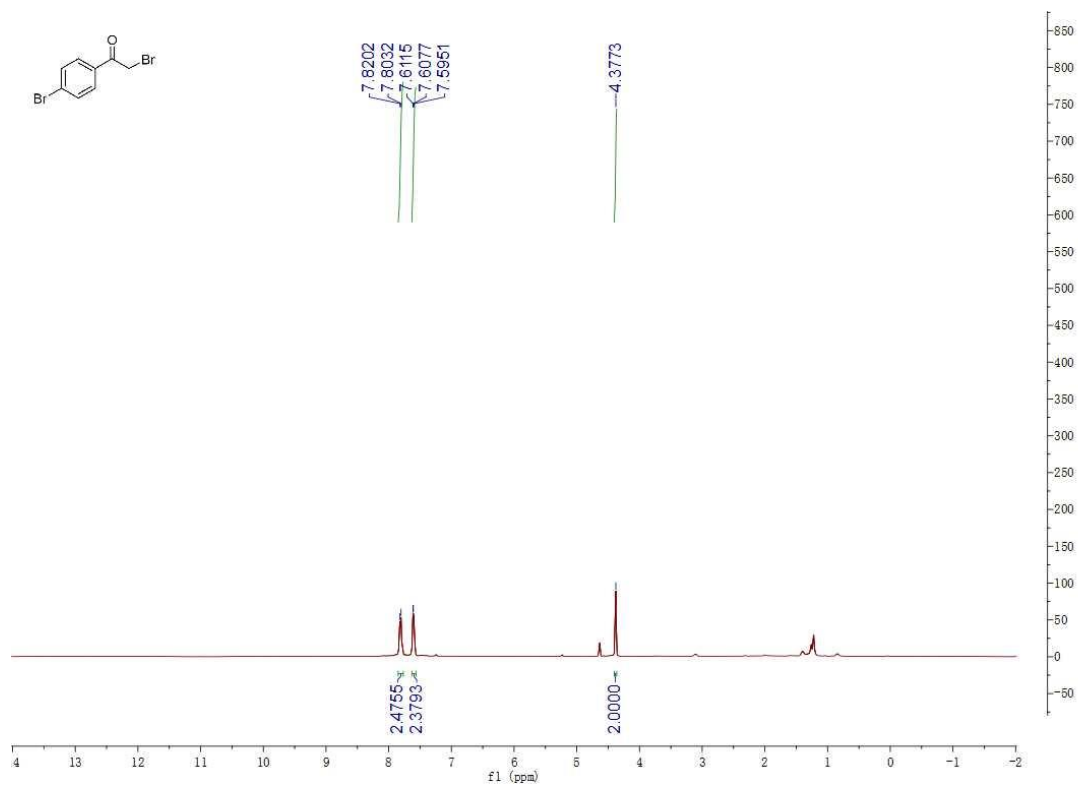



$^{13}\text{C}$  NMR (101 MHz,  $\text{CDCl}_3$ ) 3e

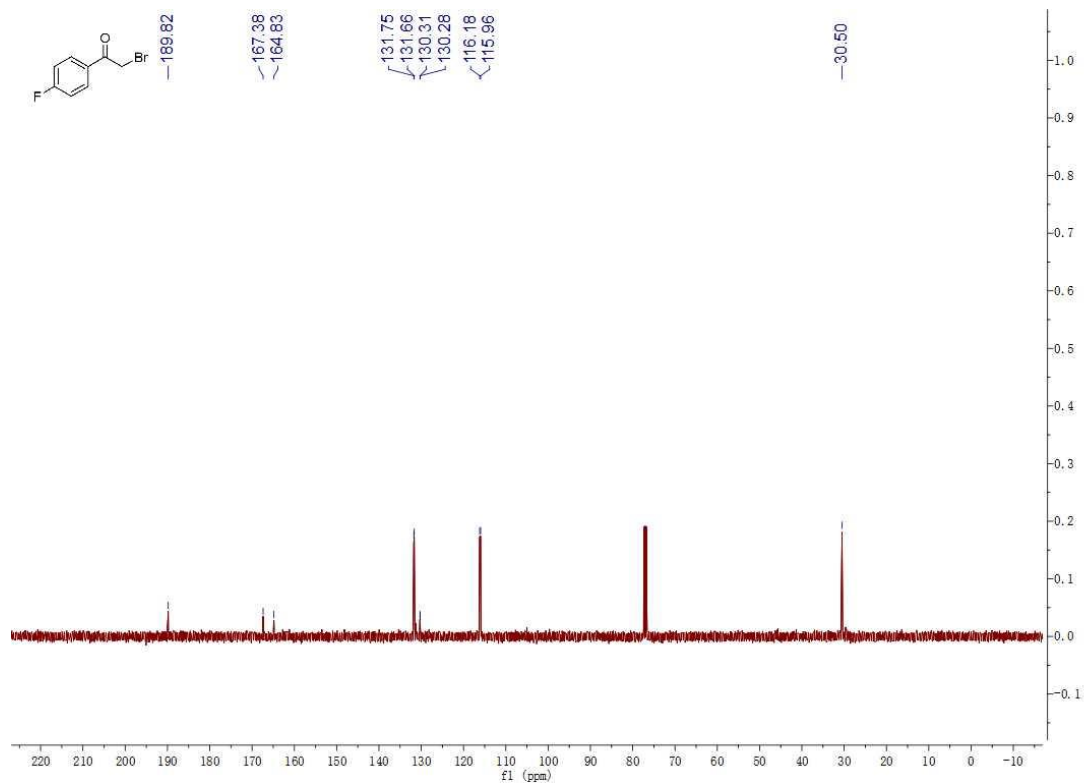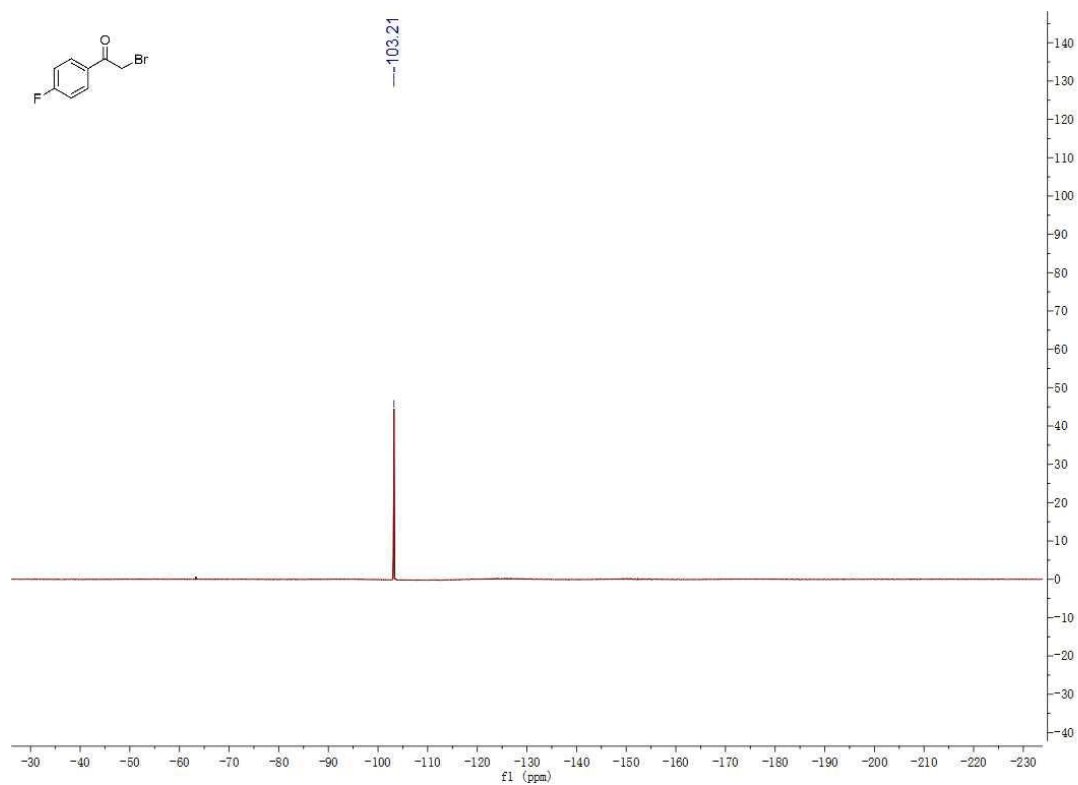

$^1\text{H}$  NMR (400 MHz,  $\text{CDCl}_3$ ) 3e

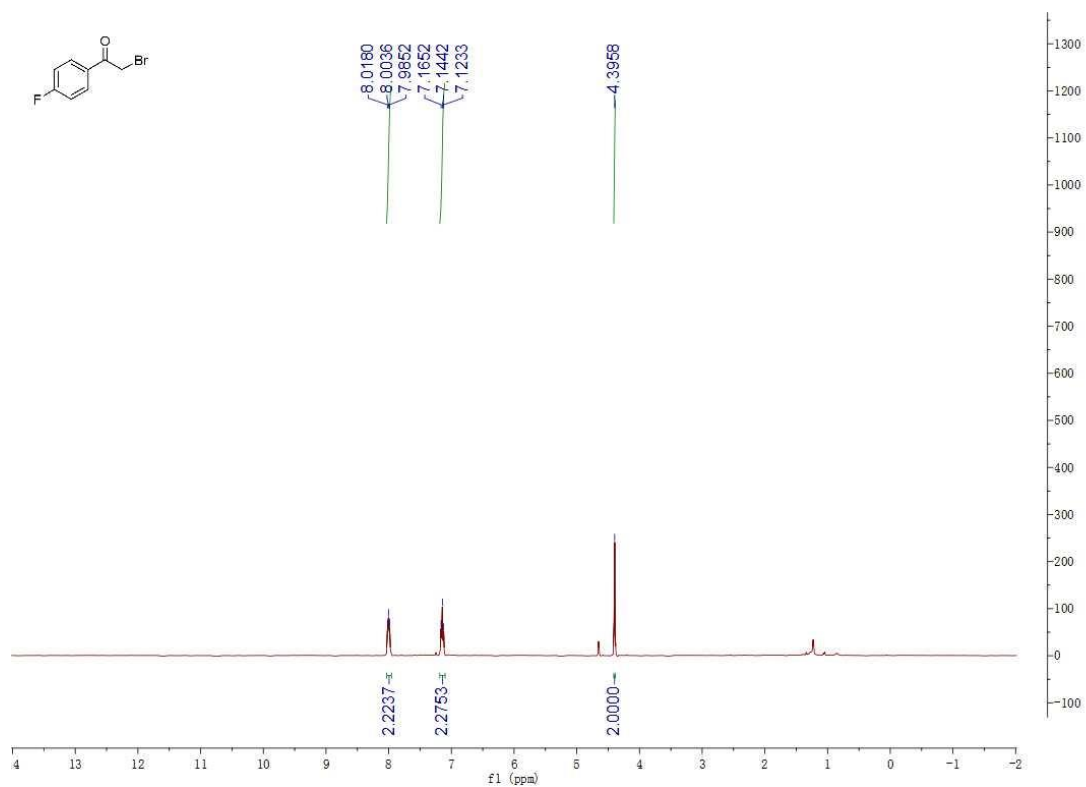

$^{13}\text{C}$  NMR (101 MHz,  $\text{CDCl}_3$ ) 3f

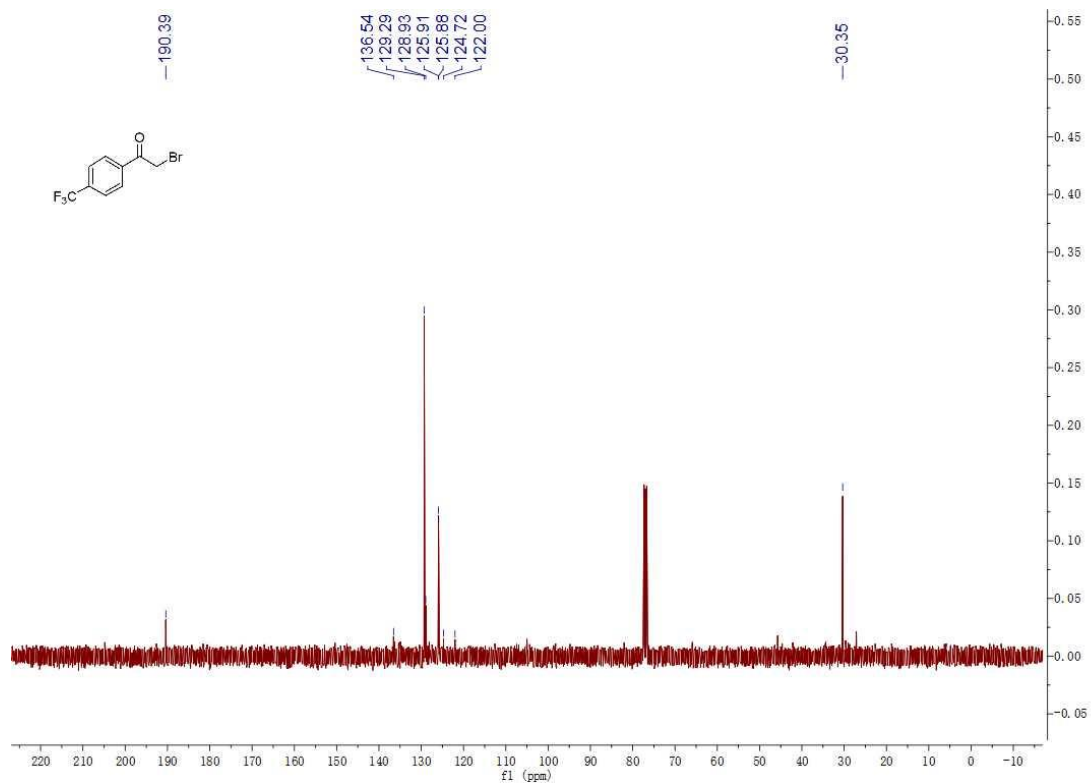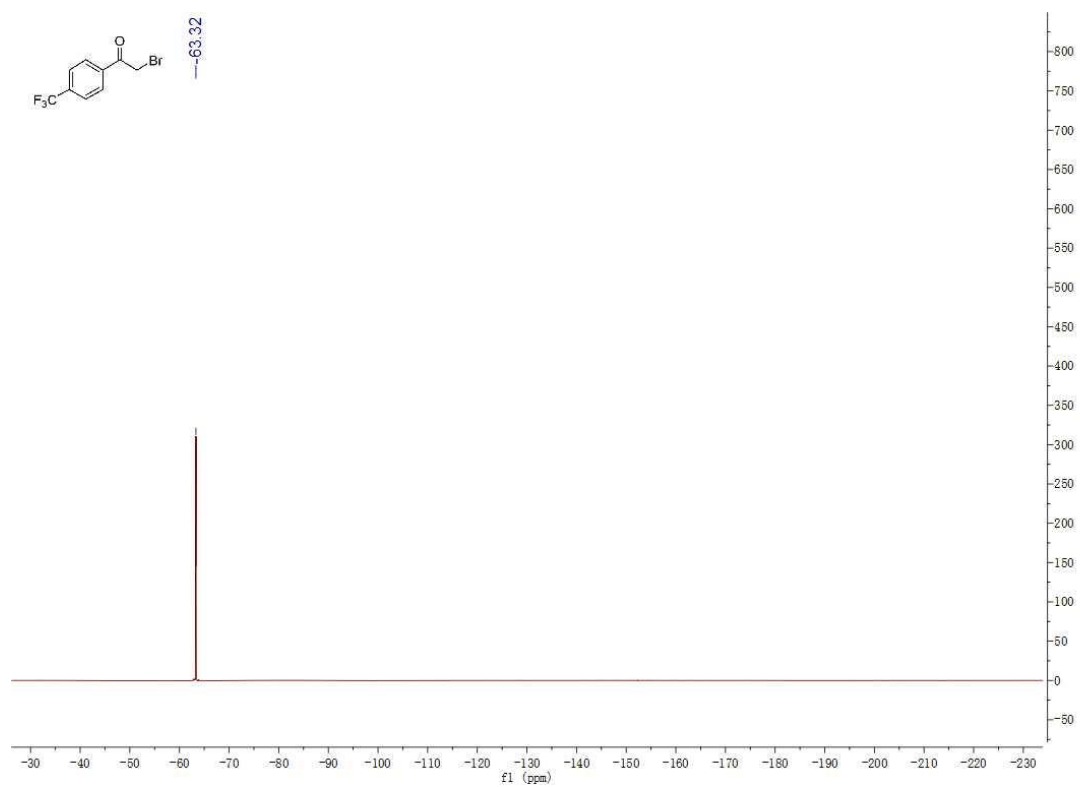

$^1\text{H}$  NMR (400 MHz,  $\text{CDCl}_3$ ) 3f

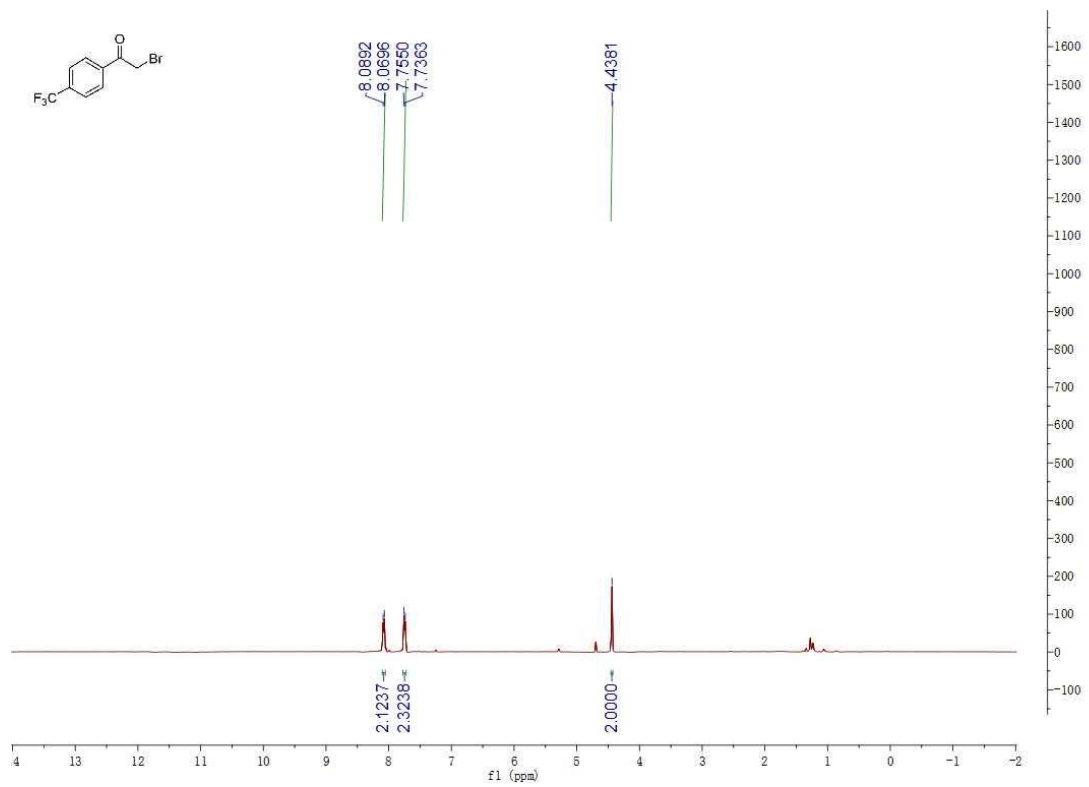

$^{13}\text{C}$  NMR (101 MHz,  $\text{CDCl}_3$ ) 3g

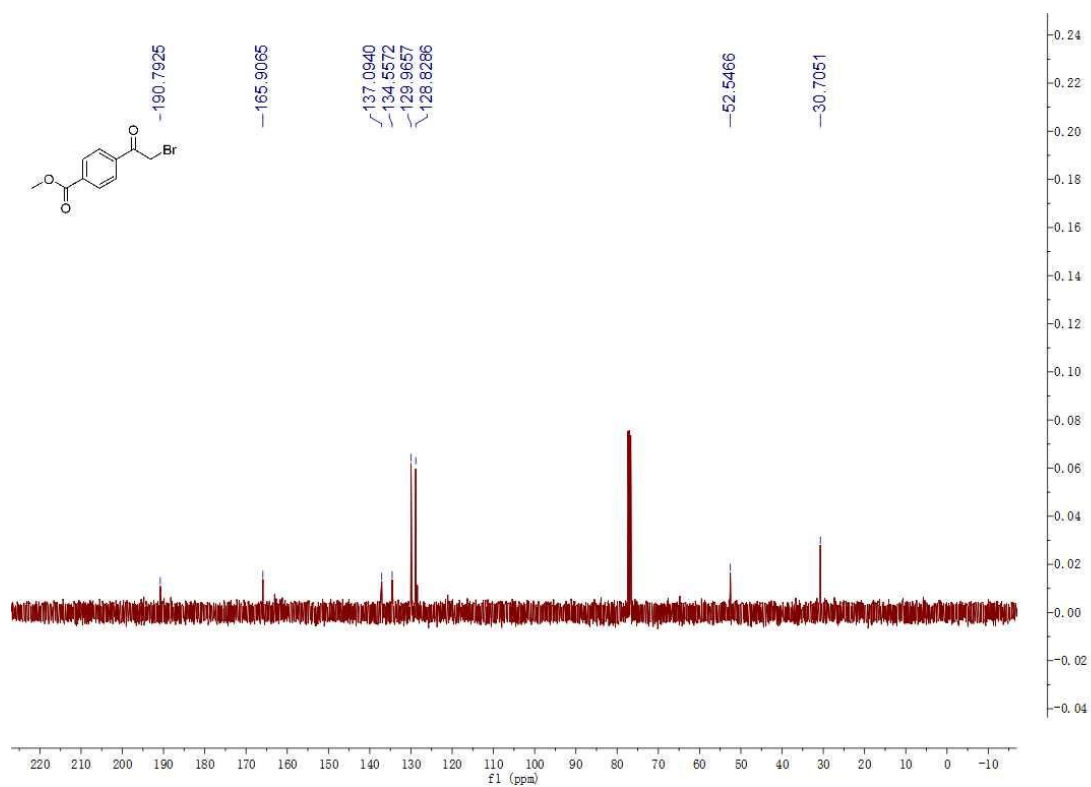

$^1\text{H}$  NMR (400 MHz,  $\text{CDCl}_3$ ) 3g

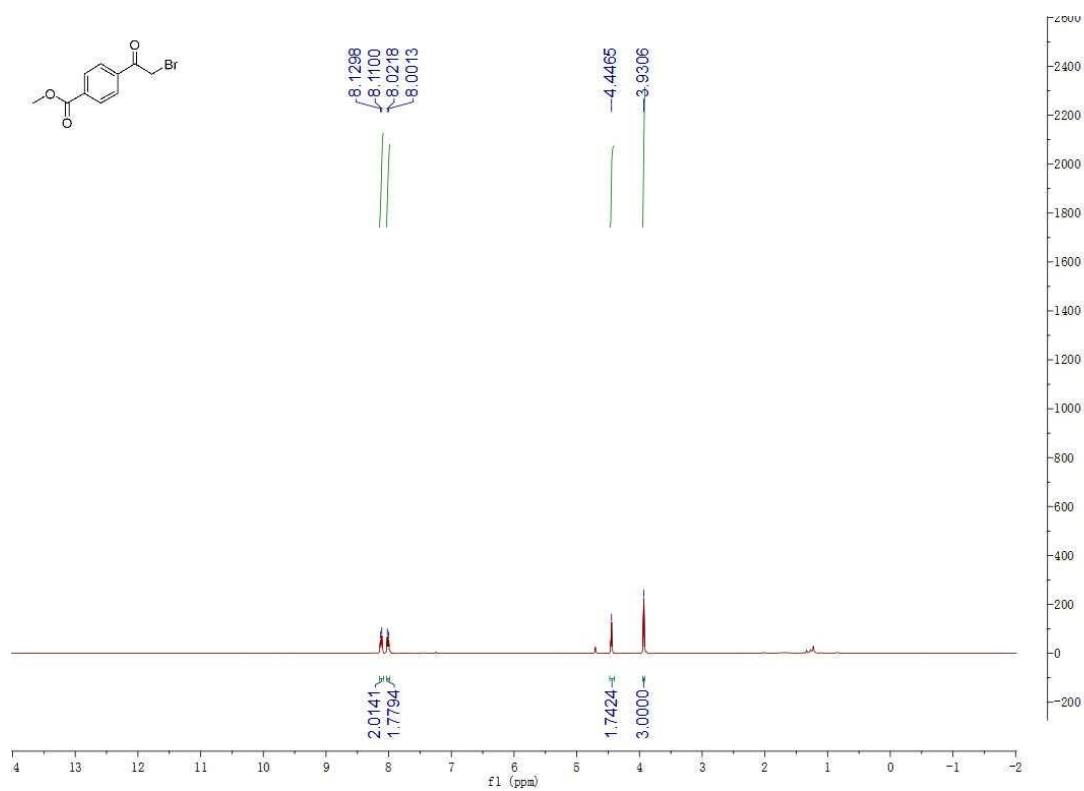

$^{13}\text{C}$  NMR (101 MHz,  $\text{CDCl}_3$ ) 3h

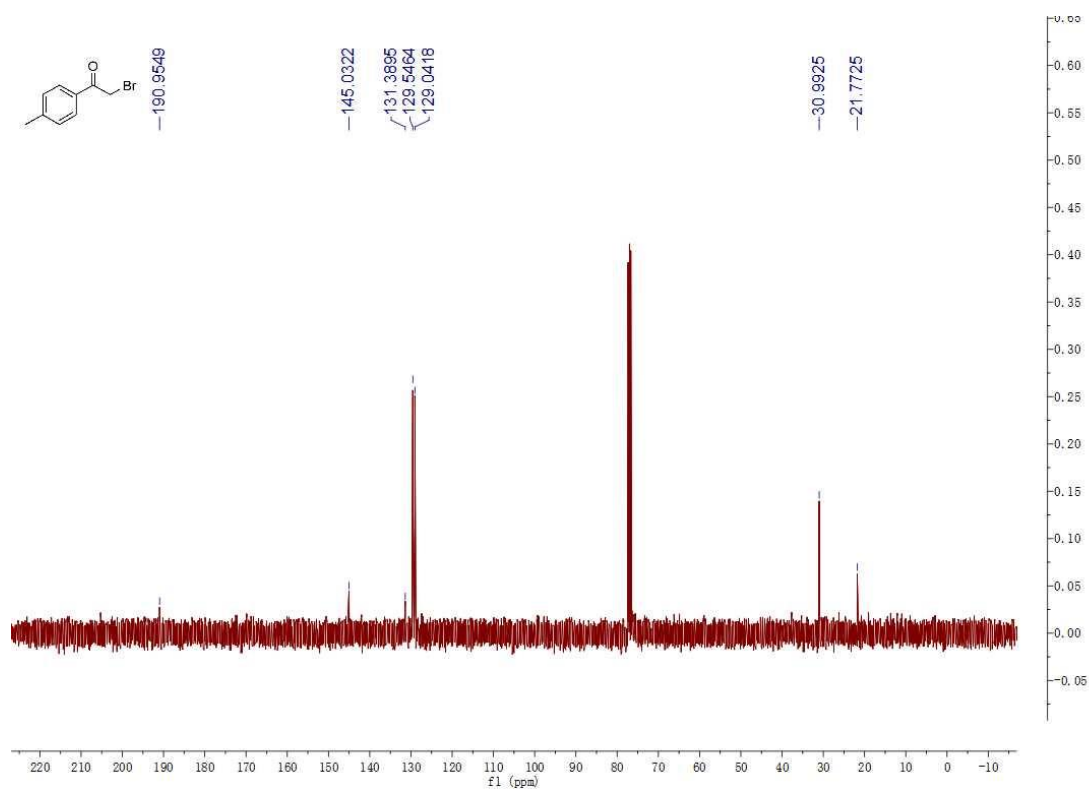

$^1\text{H}$  NMR (400 MHz,  $\text{CDCl}_3$ ) 3h

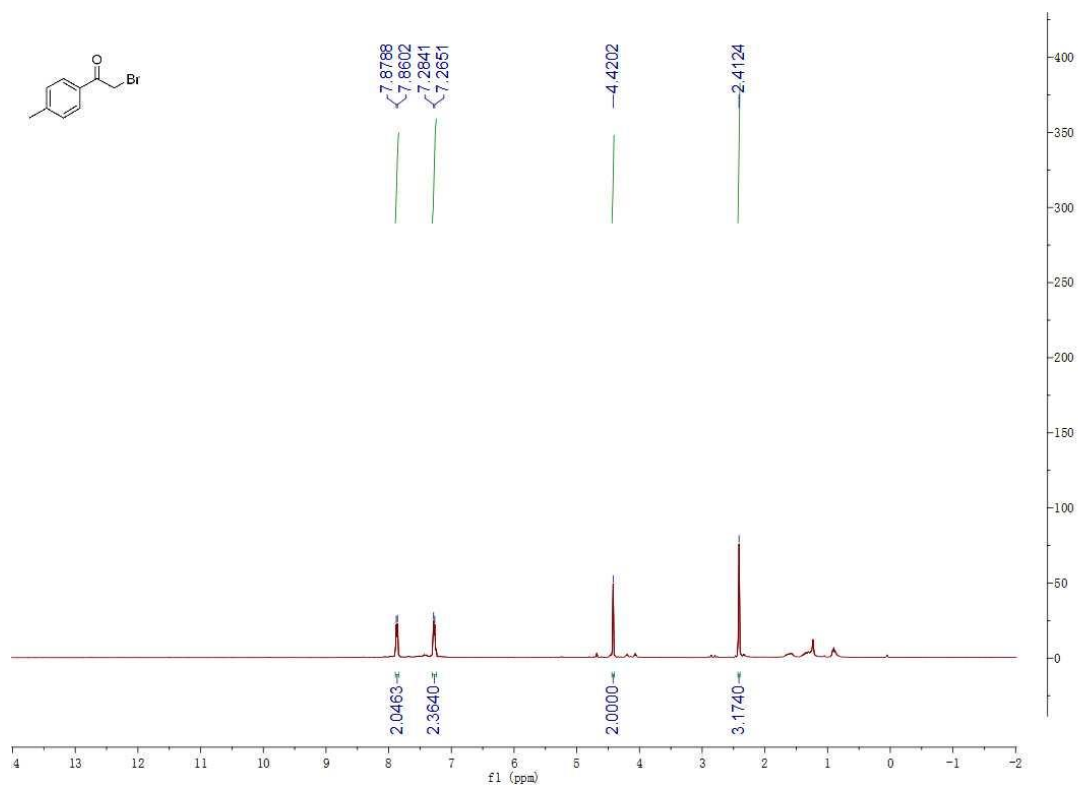

<sup>13</sup>C NMR (101 MHz, CDCl<sub>3</sub>) 3i

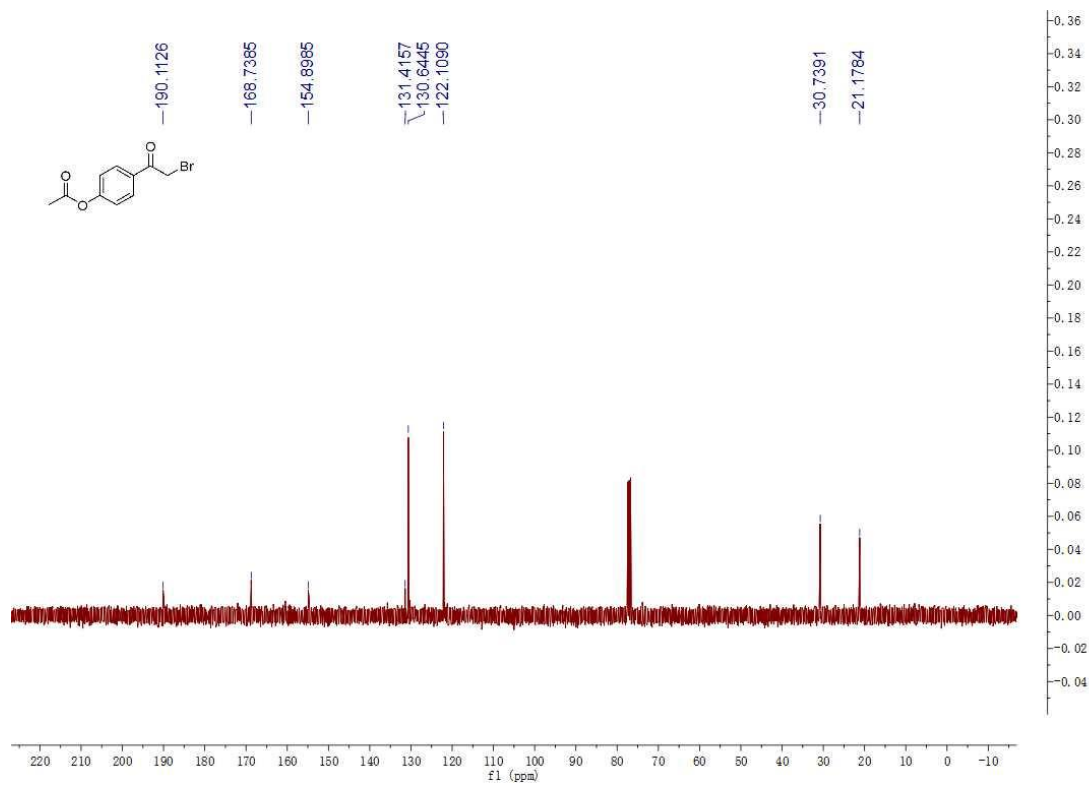

<sup>1</sup>H NMR (400 MHz, CDCl<sub>3</sub>) 3i

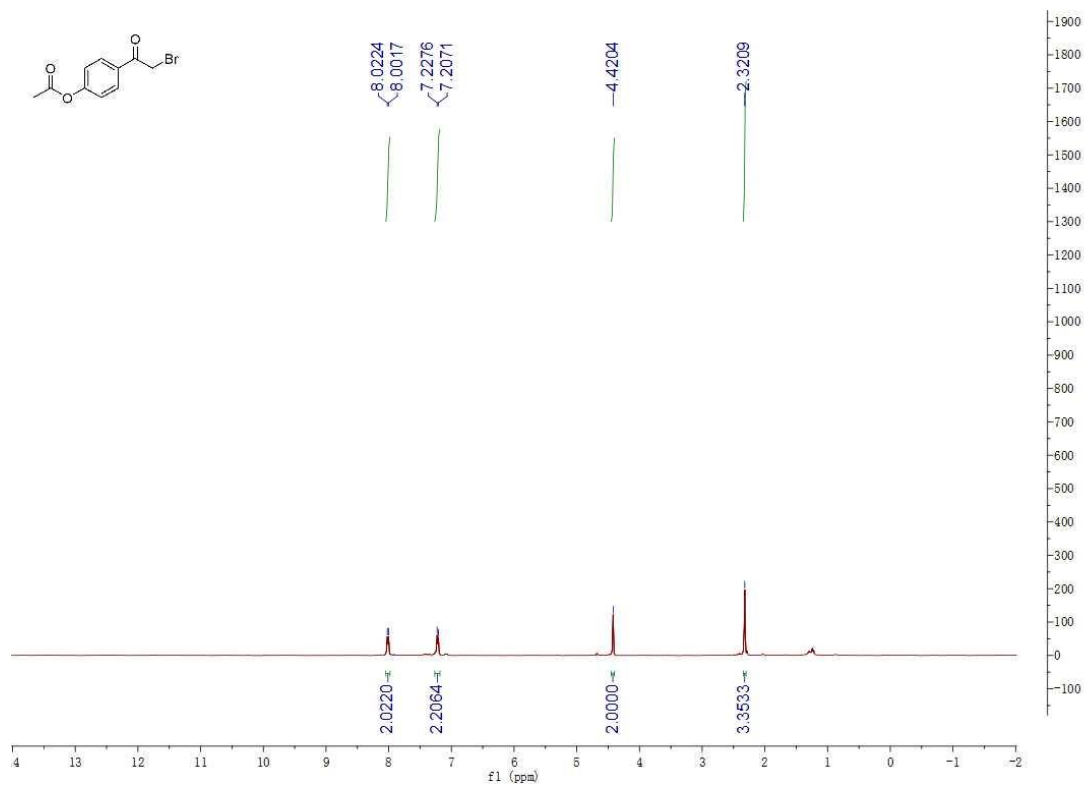

<sup>13</sup>C NMR (101 MHz, CDCl<sub>3</sub>) 3j

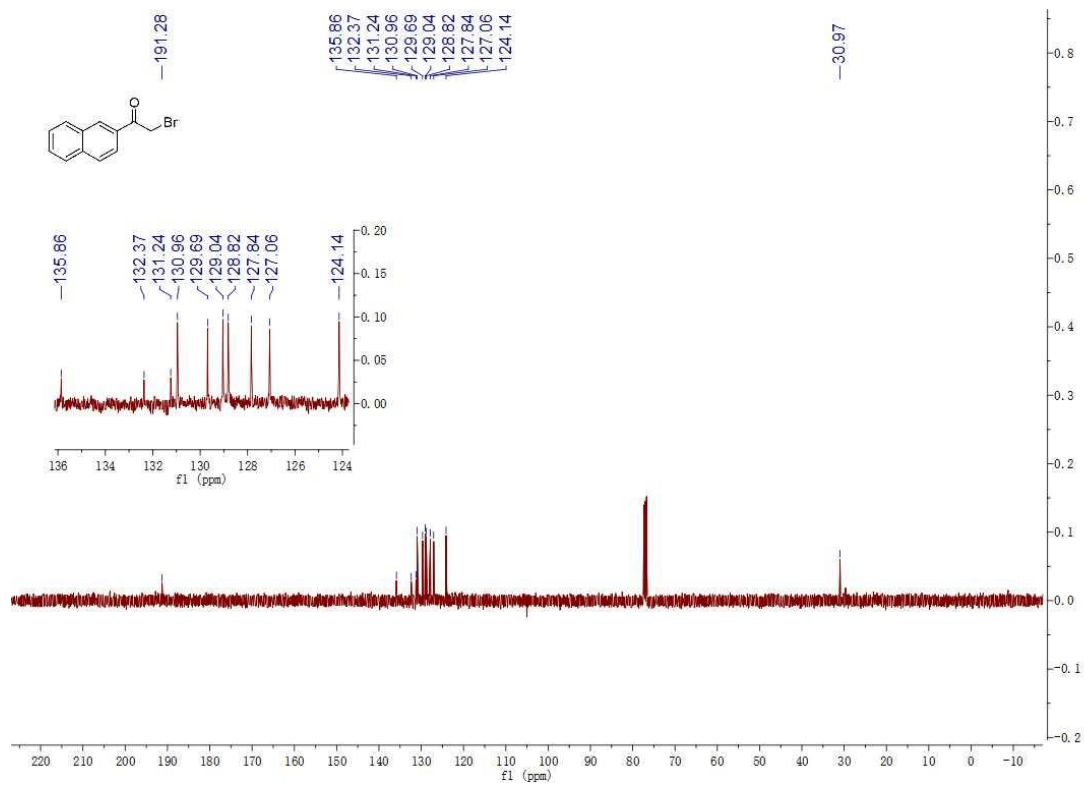

<sup>1</sup>H NMR (400 MHz, CDCl<sub>3</sub>) 3j

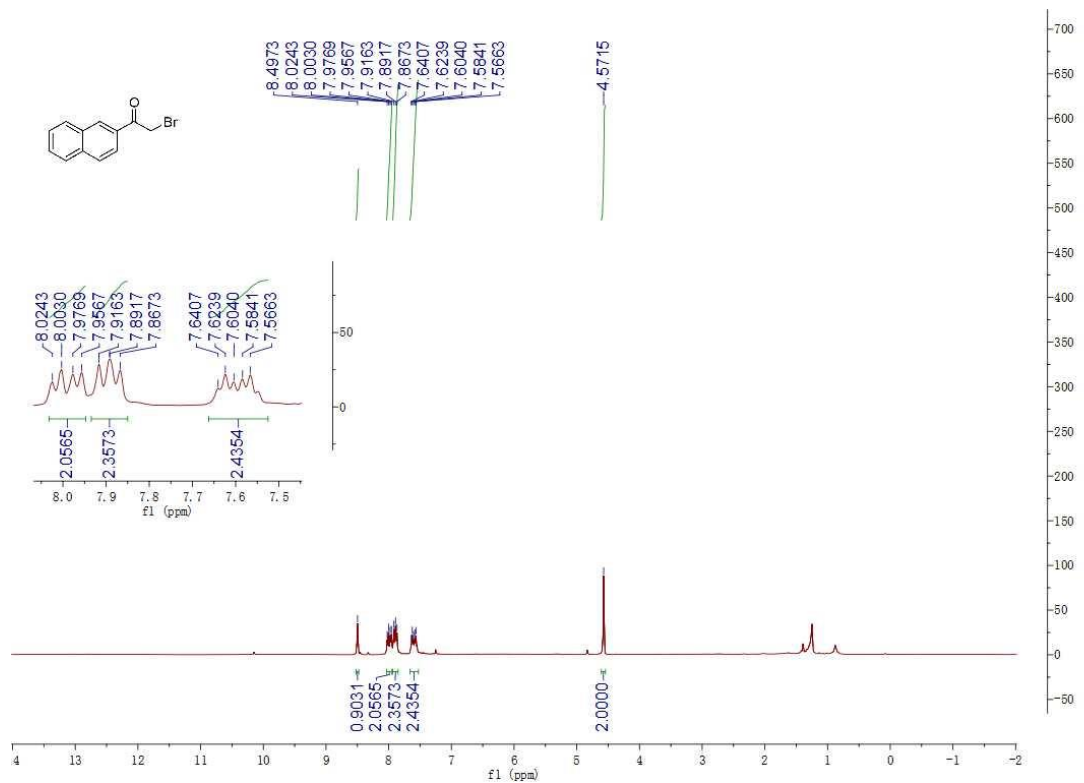



$^{13}\text{C}$  NMR (101 MHz,  $\text{CDCl}_3$ ) 3k

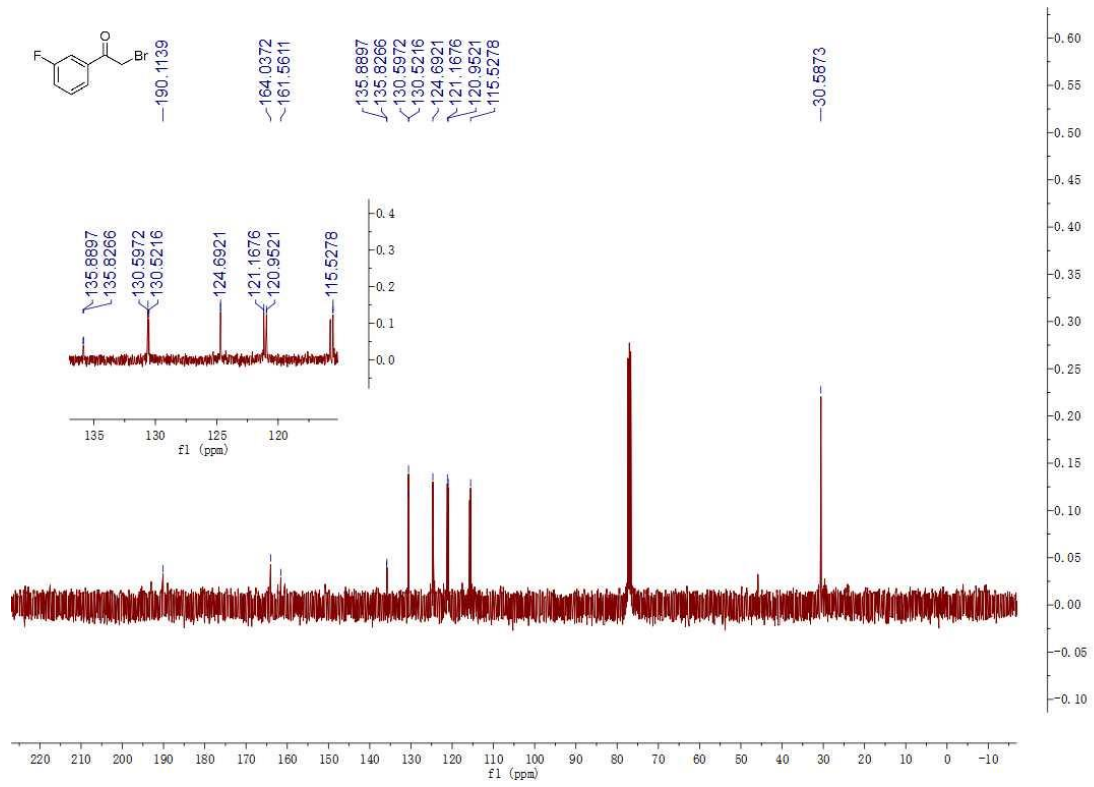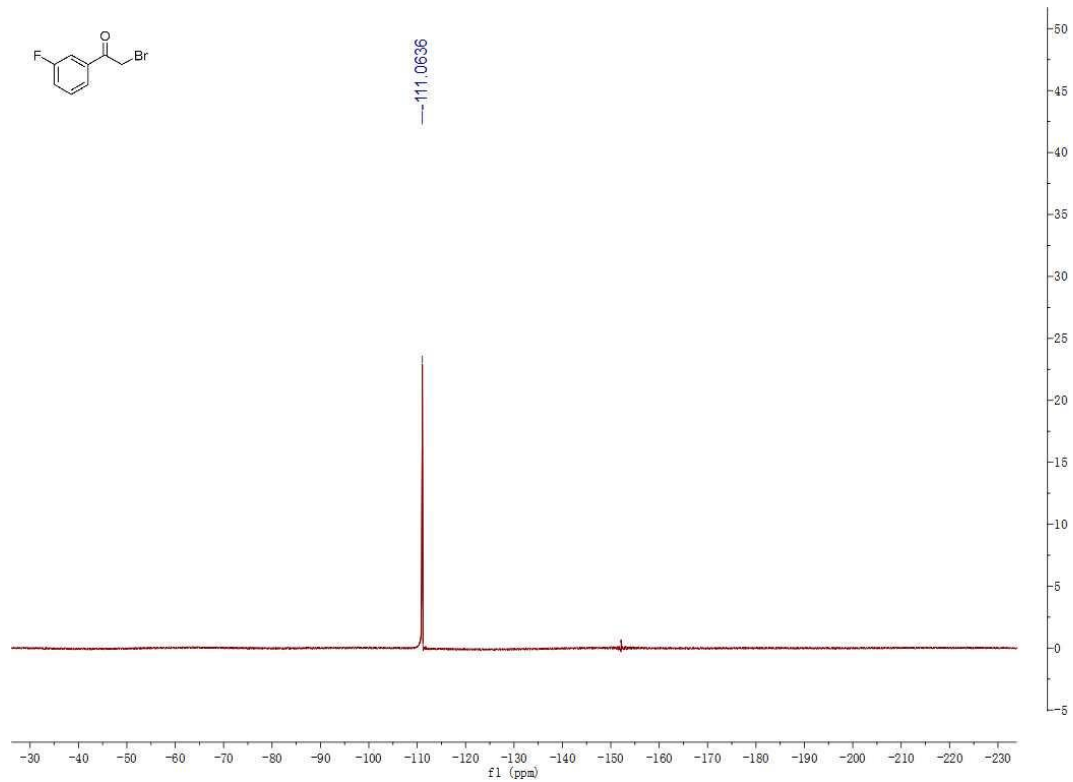

$^1\text{H}$  NMR (400 MHz,  $\text{CDCl}_3$ ) 3k

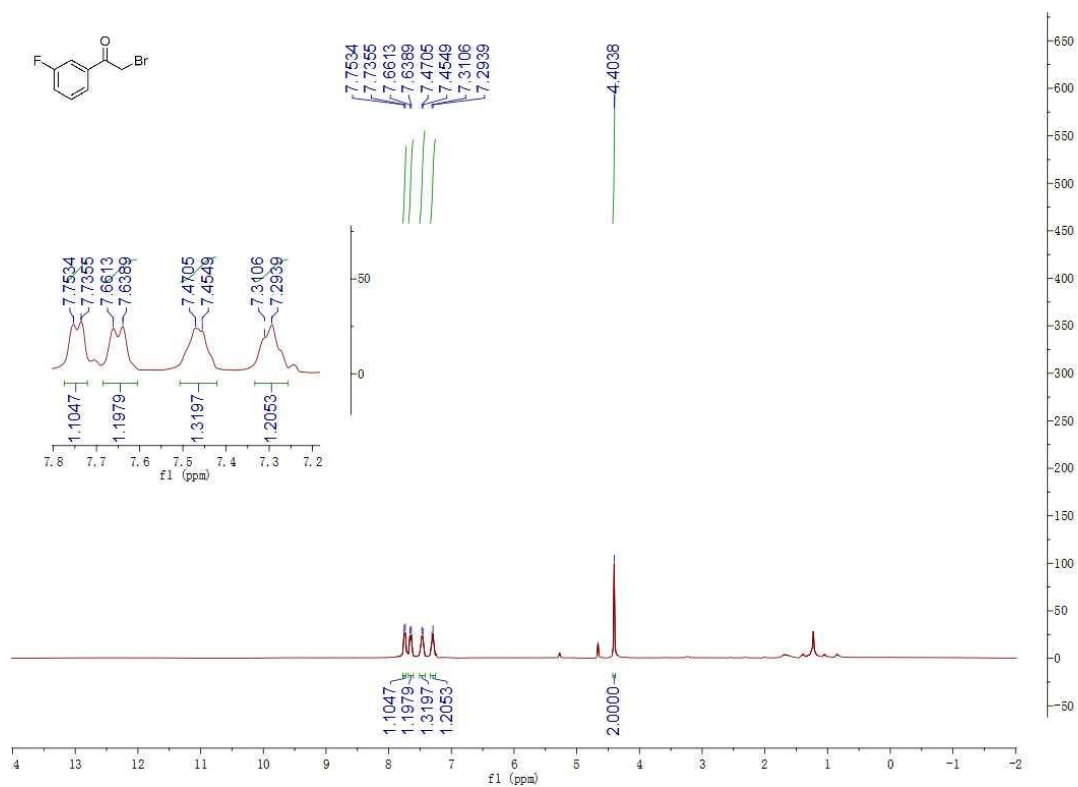

### $^{13}\text{C}$ NMR (101 MHz, $\text{CDCl}_3$ ) 31

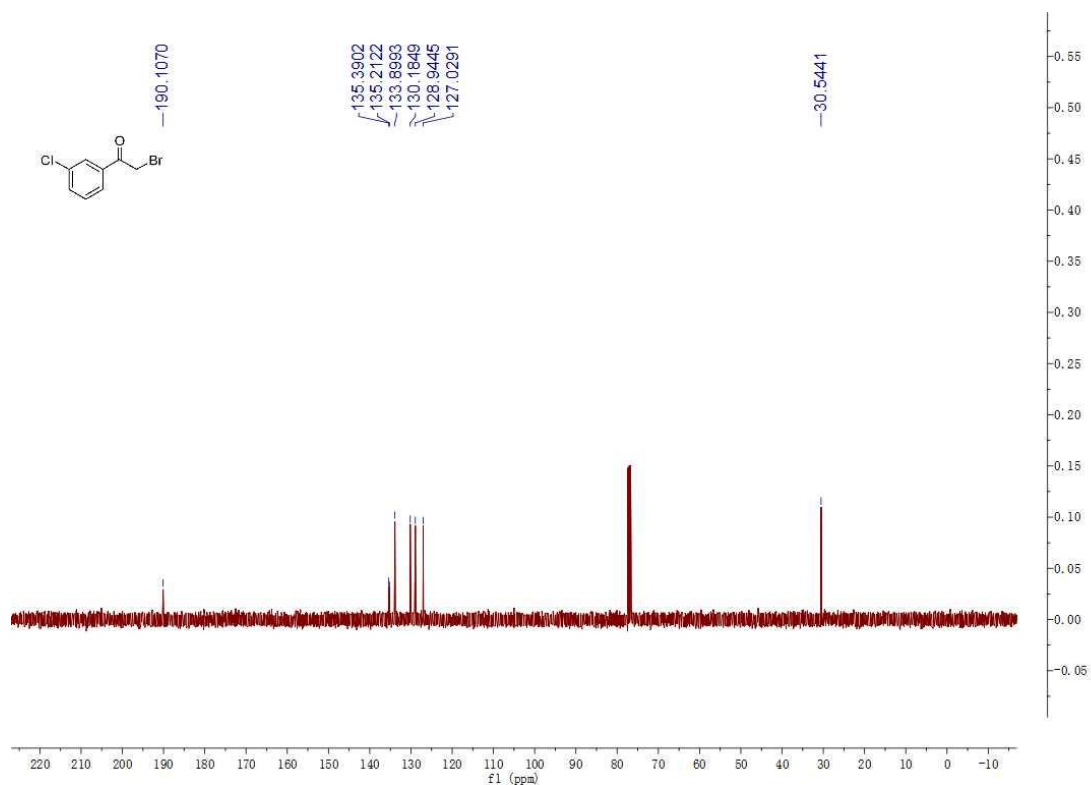

### $^1\text{H}$ NMR (400 MHz, $\text{CDCl}_3$ ) 31

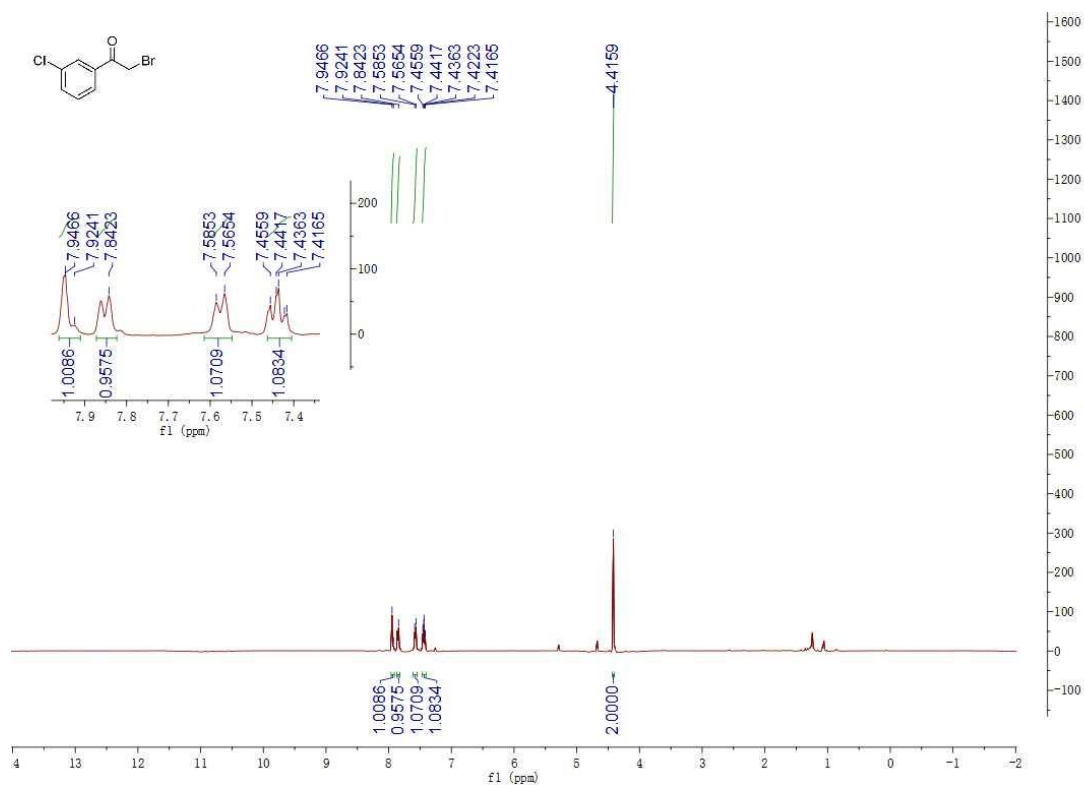

<sup>13</sup>C NMR (101 MHz, CDCl<sub>3</sub>) 3m

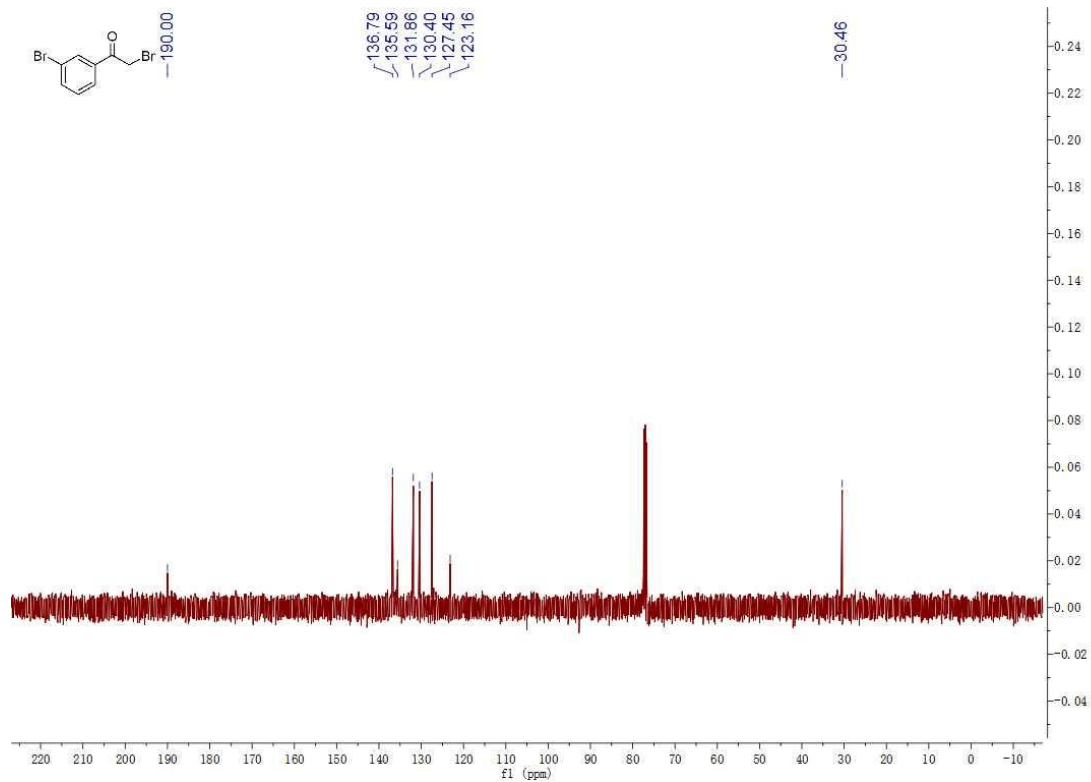

<sup>1</sup>H NMR (400 MHz, CDCl<sub>3</sub>) 3m

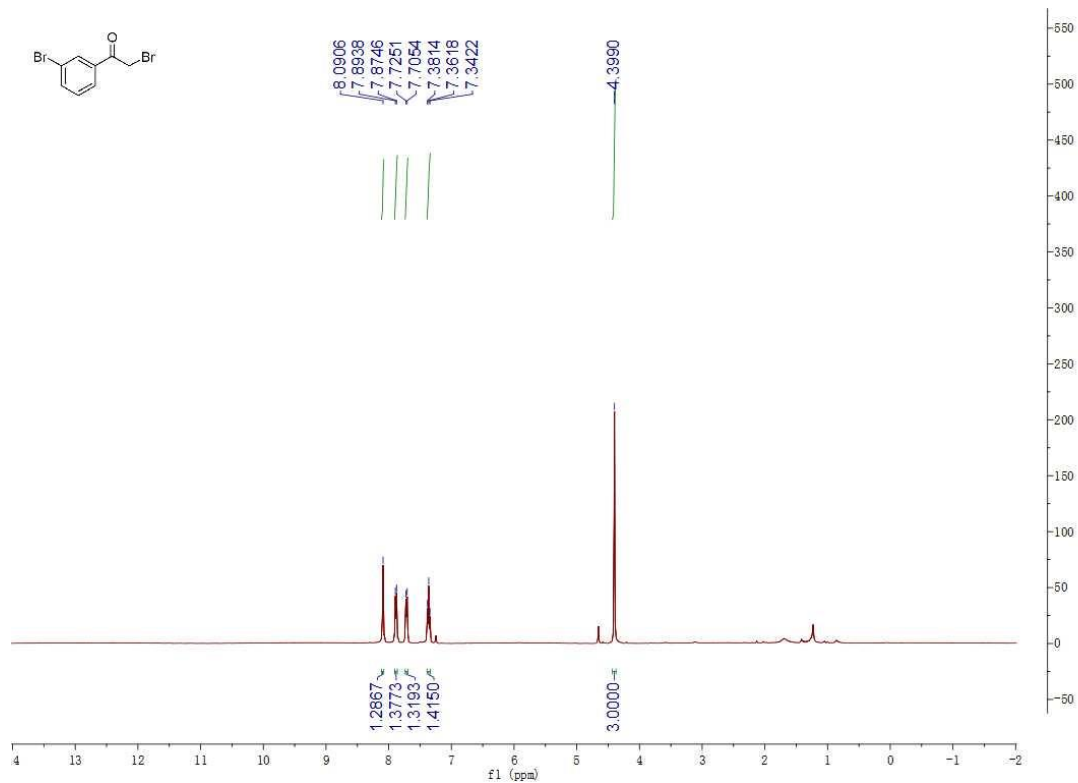

$^{13}\text{C}$  NMR (101 MHz,  $\text{CDCl}_3$ ) 3n

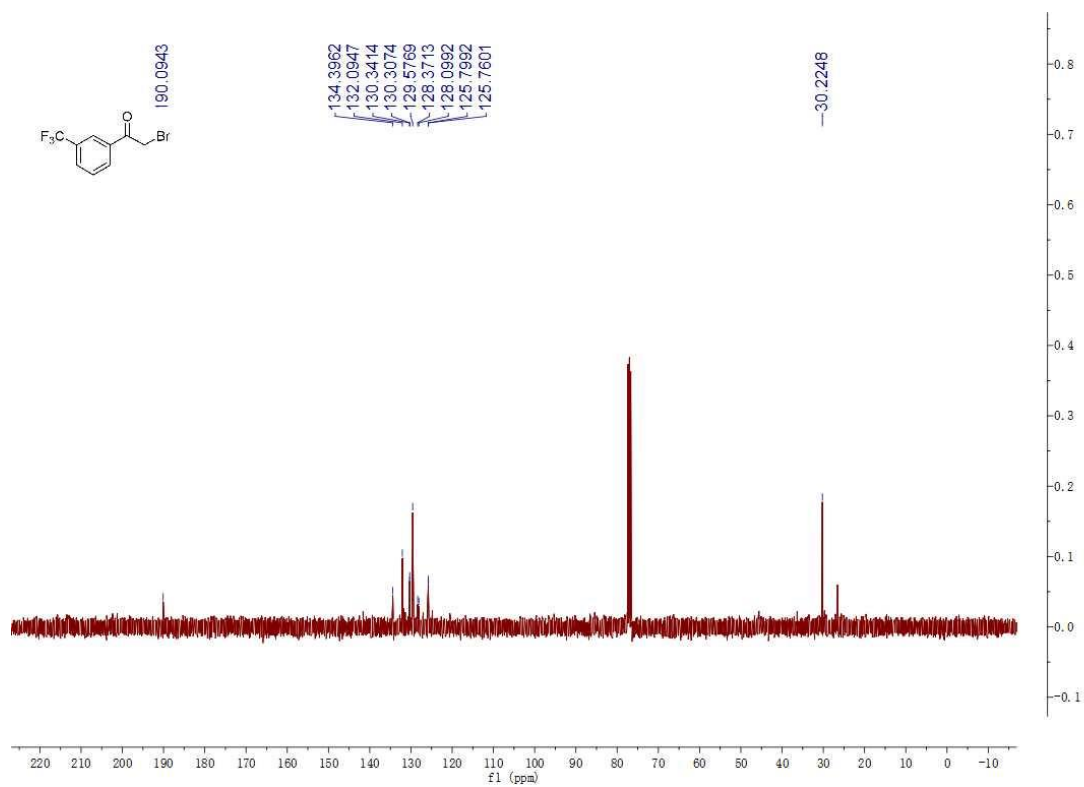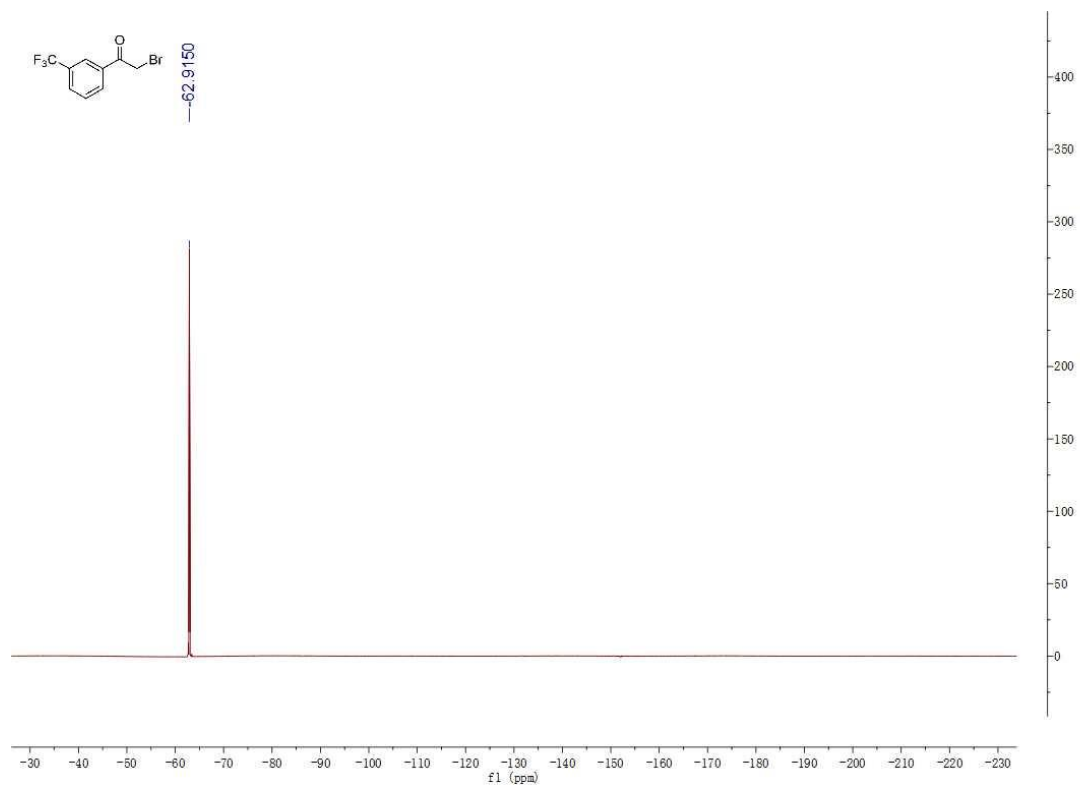

$^1\text{H}$  NMR (400 MHz,  $\text{CDCl}_3$ ) 3n

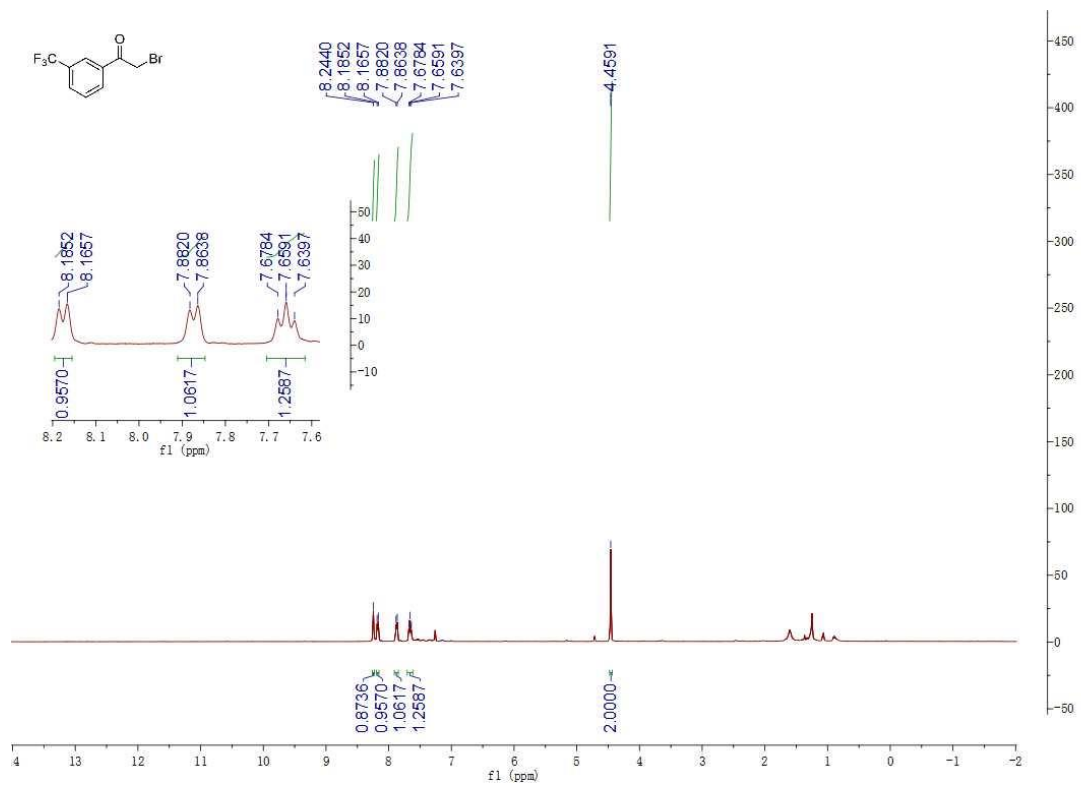

$^{13}\text{C}$  NMR (101 MHz,  $\text{CDCl}_3$ ) 3o

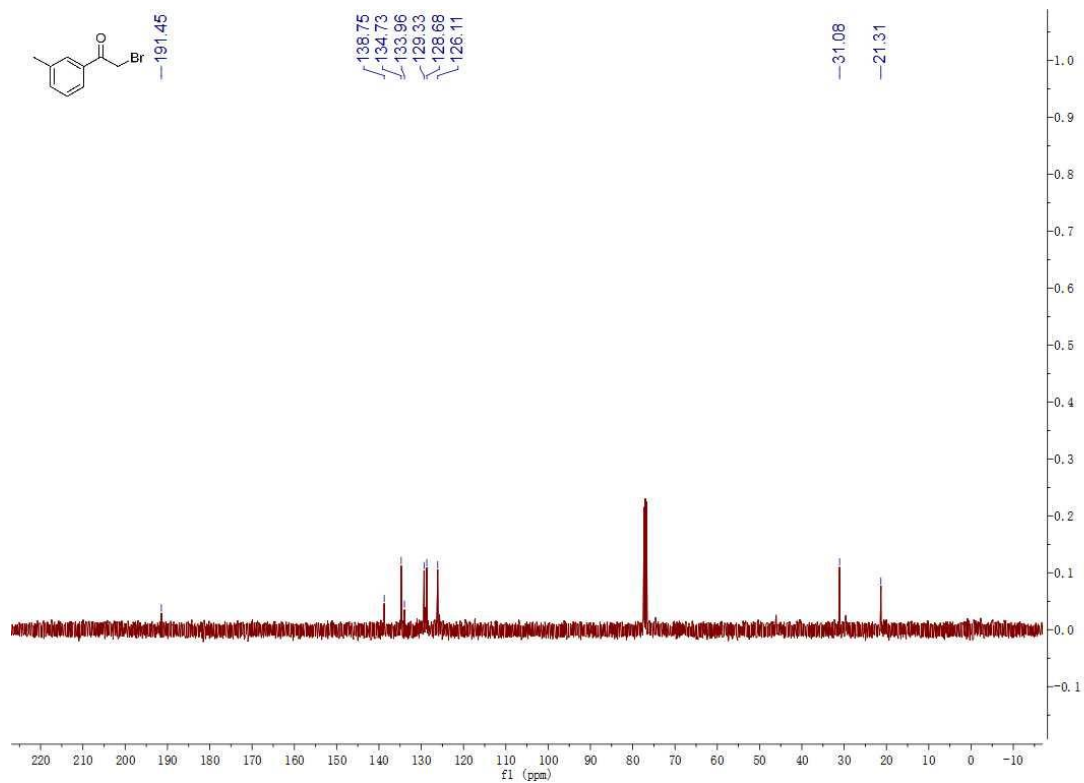

$^1\text{H}$  NMR (400 MHz,  $\text{CDCl}_3$ ) 3o

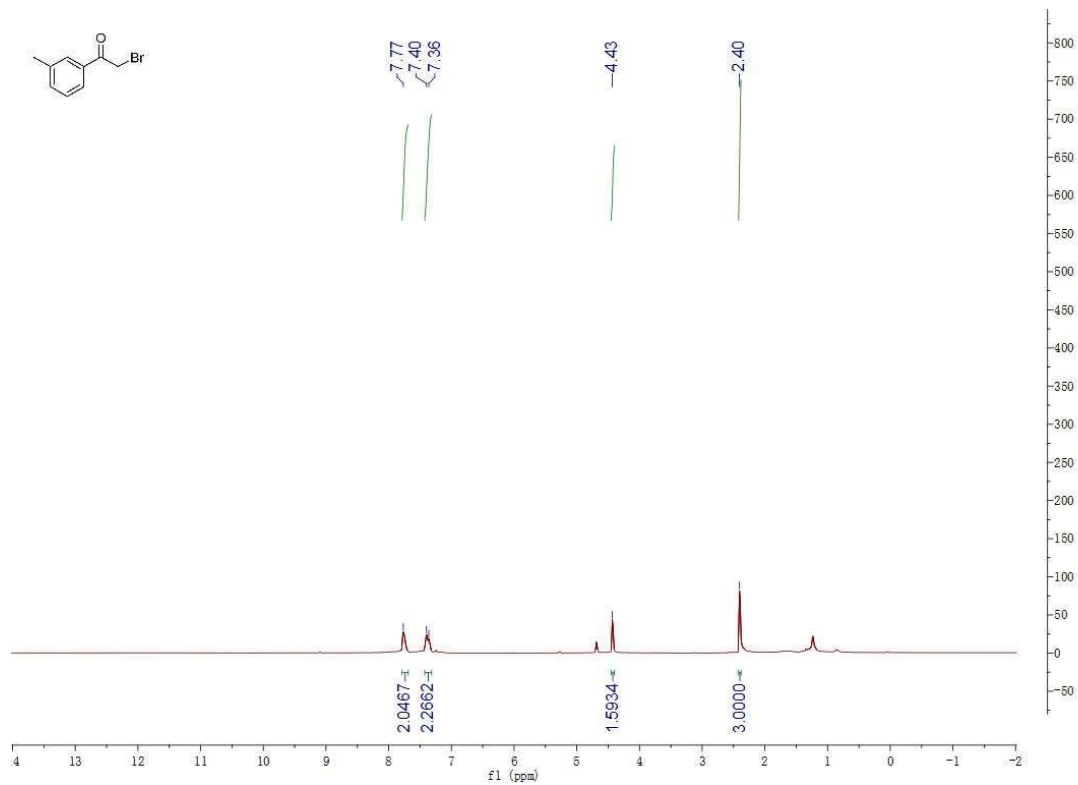

<sup>13</sup>C NMR (101 MHz, CDCl<sub>3</sub>) 3p

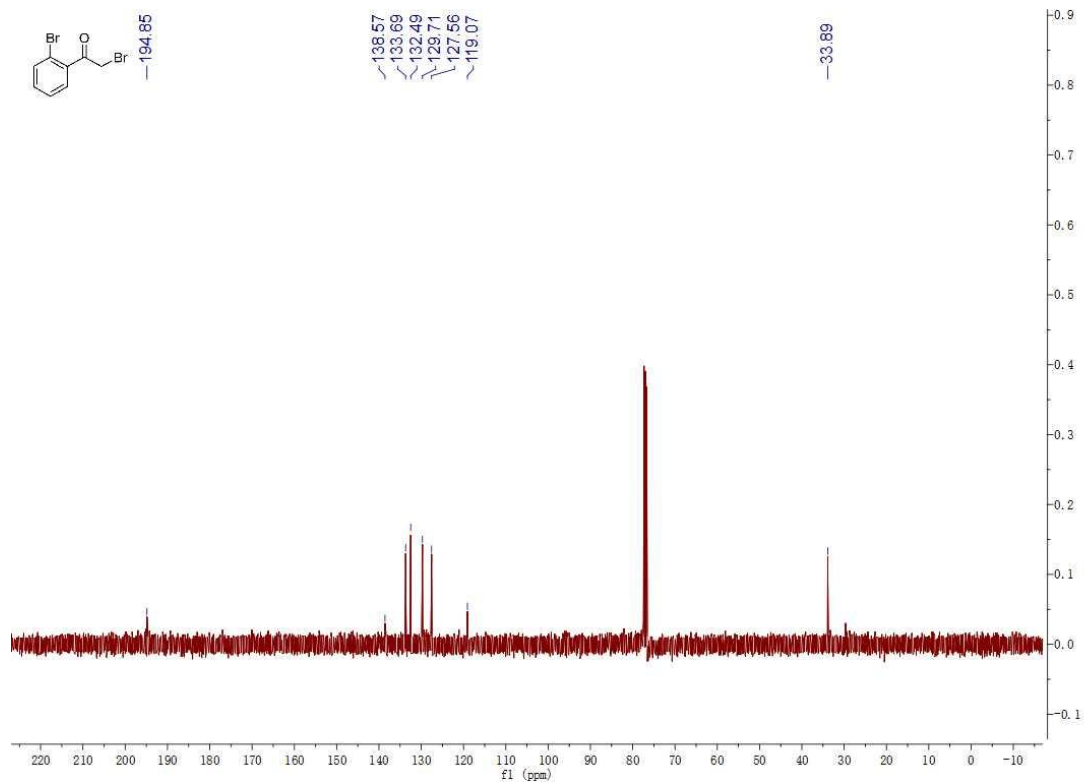

<sup>1</sup>H NMR (400 MHz, CDCl<sub>3</sub>) 3p

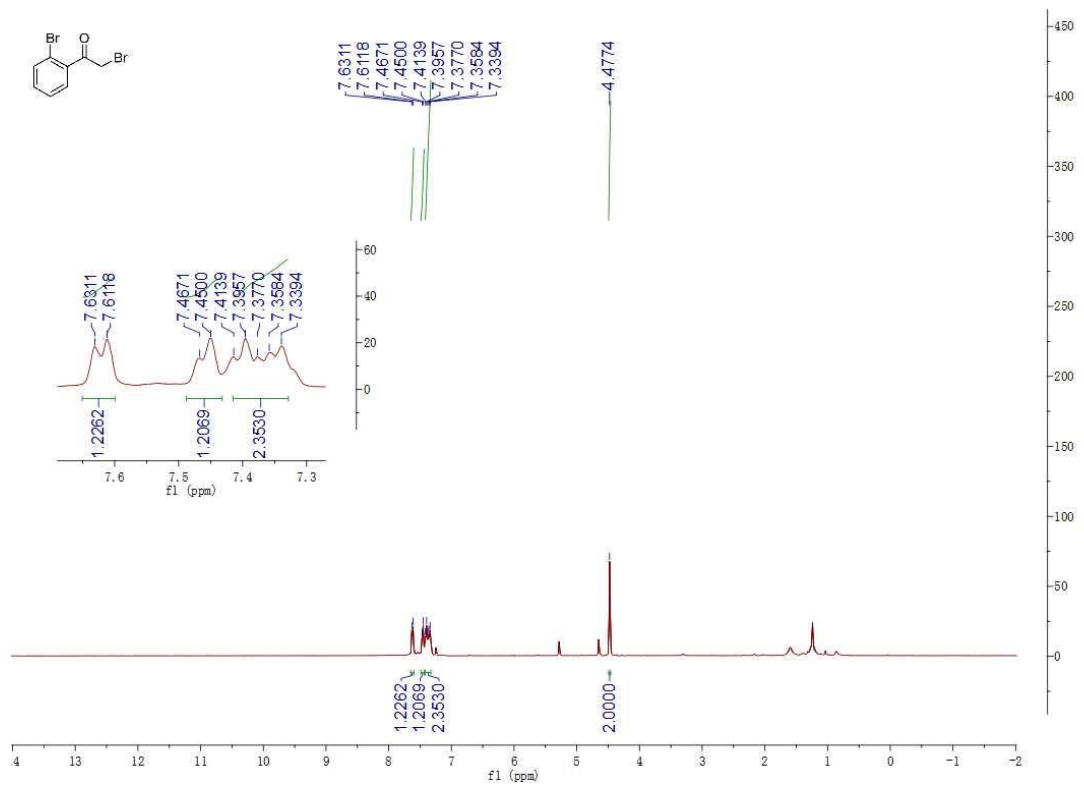



<sup>13</sup>C NMR (101 MHz, CDCl<sub>3</sub>) 3q

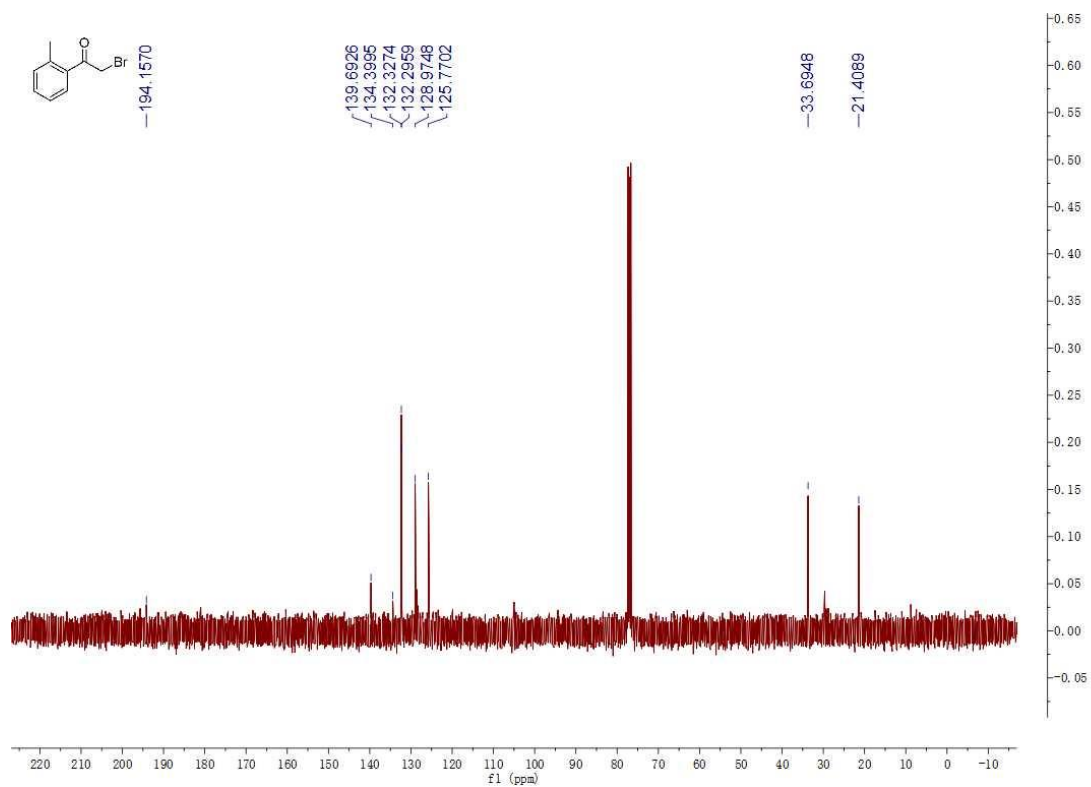

<sup>1</sup>H NMR (400 MHz, CDCl<sub>3</sub>) 3q

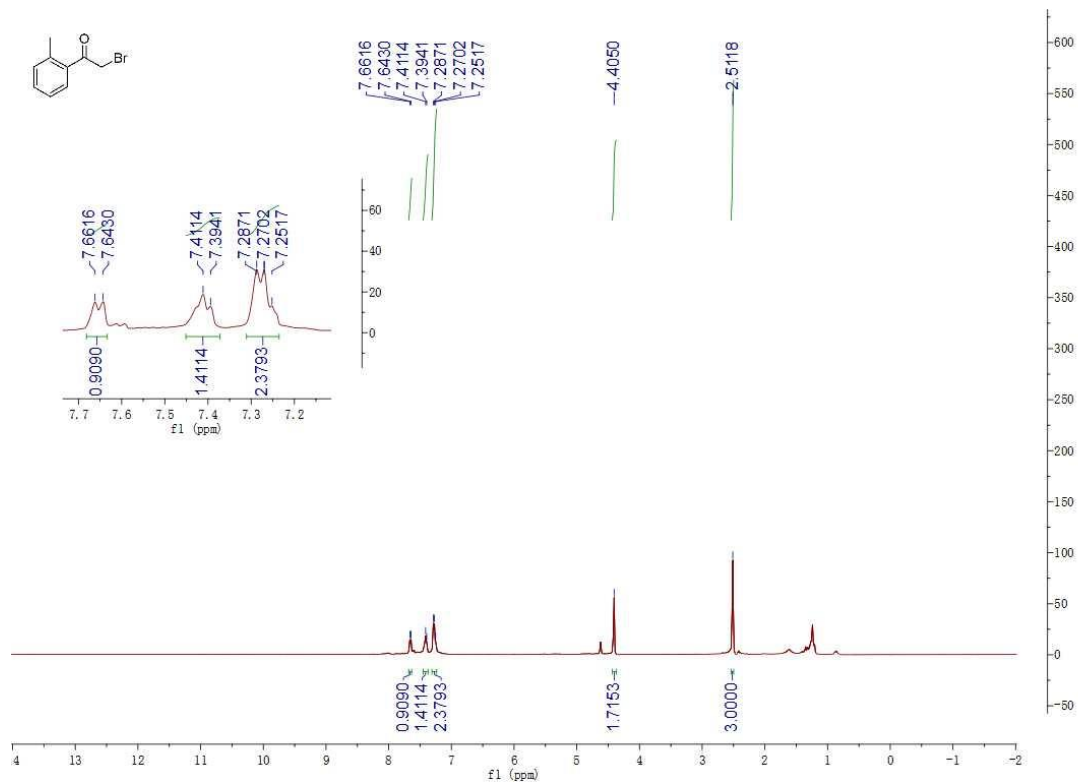

<sup>13</sup>C NMR (101 MHz, CDCl<sub>3</sub>) 3r

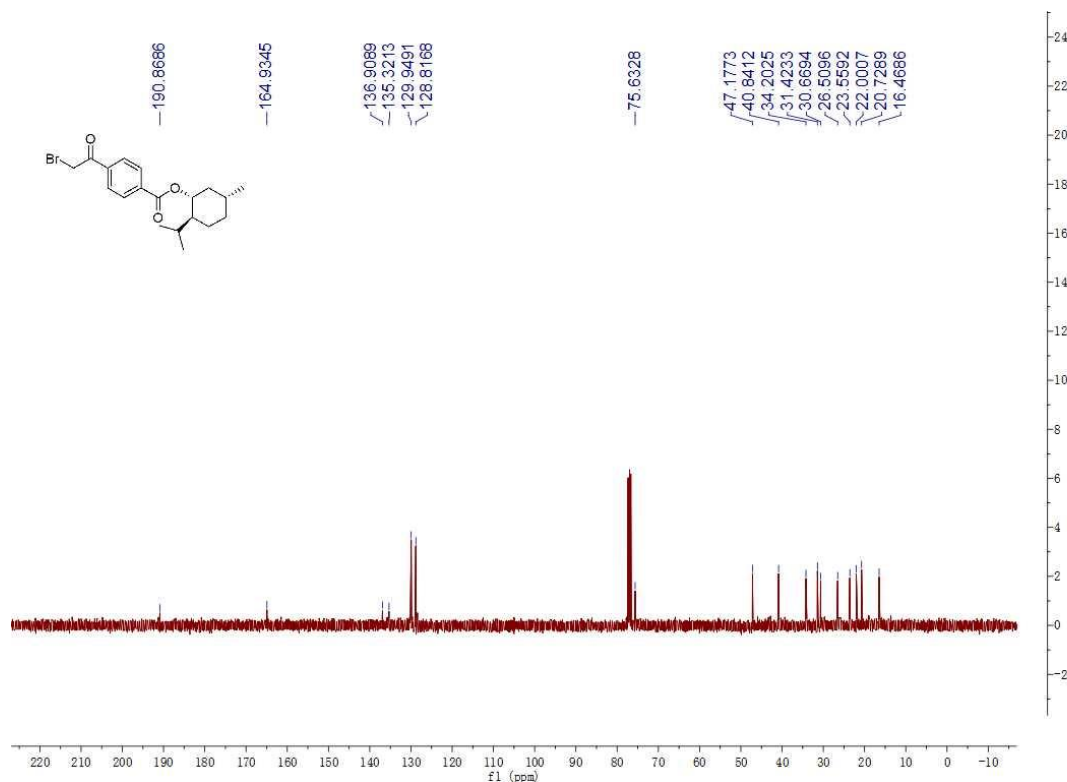

<sup>1</sup>H NMR (400 MHz, CDCl<sub>3</sub>) 3r

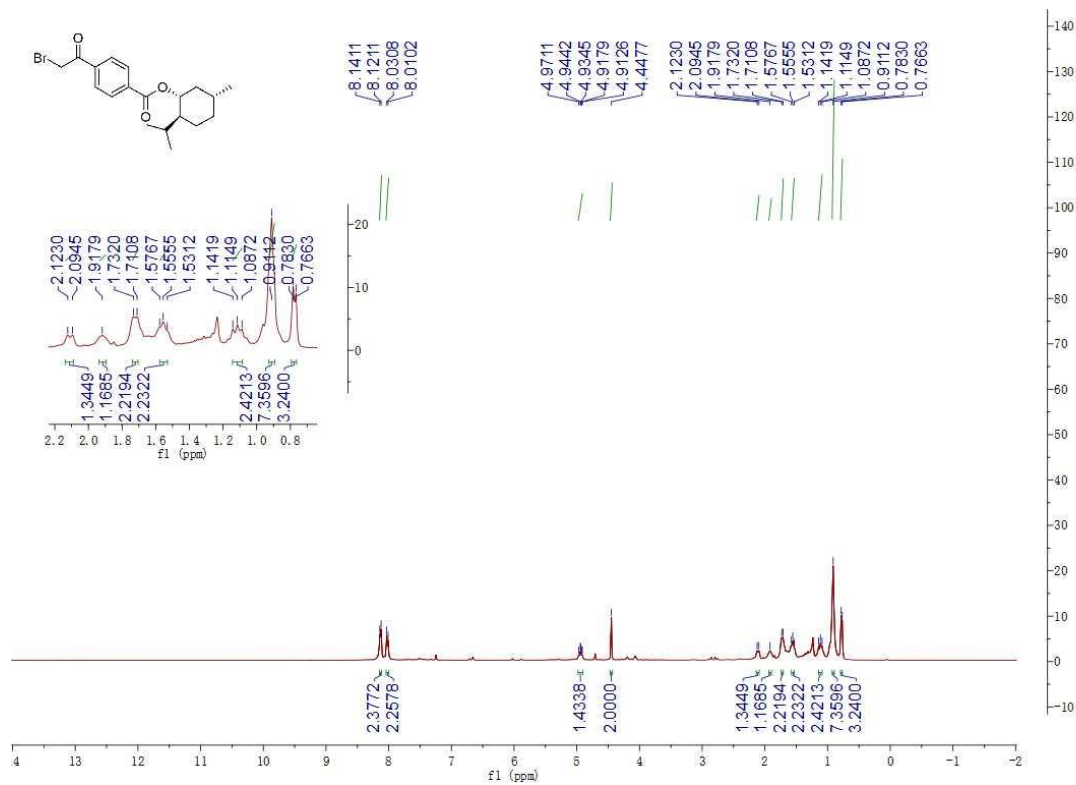

$^{13}\text{C}$  NMR (101 MHz,  $\text{CDCl}_3$ ) 3s

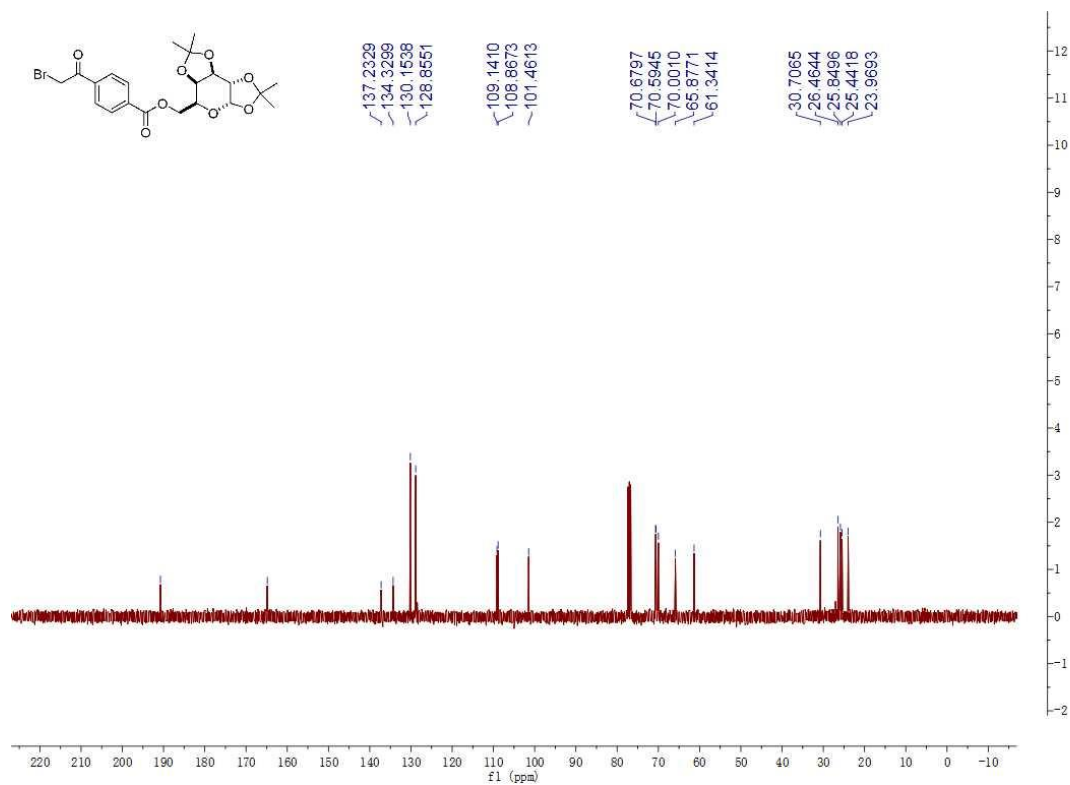

$^1\text{H}$  NMR (400 MHz,  $\text{CDCl}_3$ ) 3s

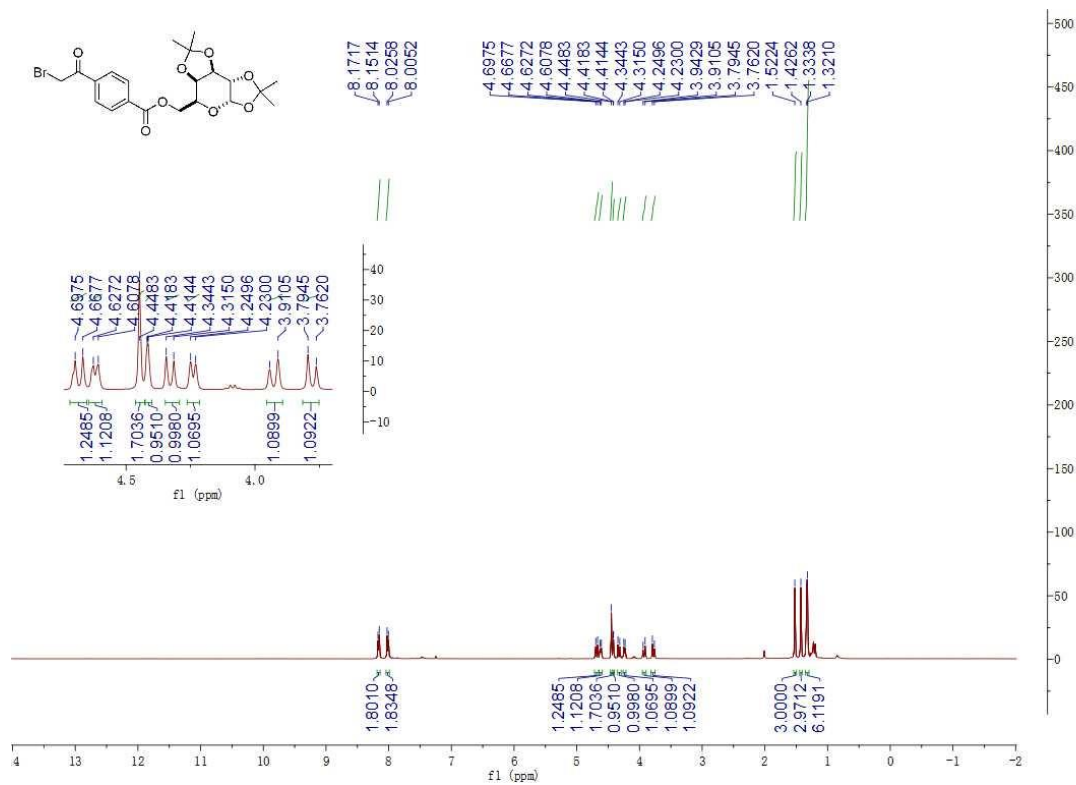

<sup>13</sup>C NMR (101 MHz, CDCl<sub>3</sub>) 3t

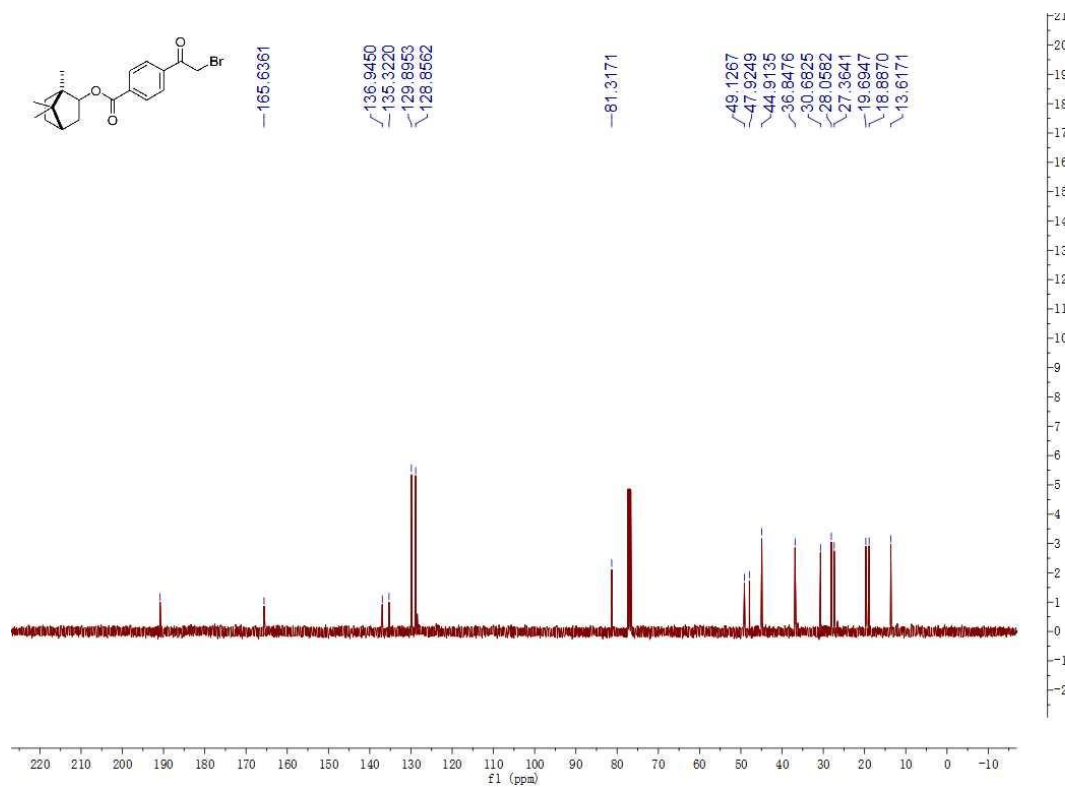

<sup>1</sup>H NMR (400 MHz, CDCl<sub>3</sub>) 3t

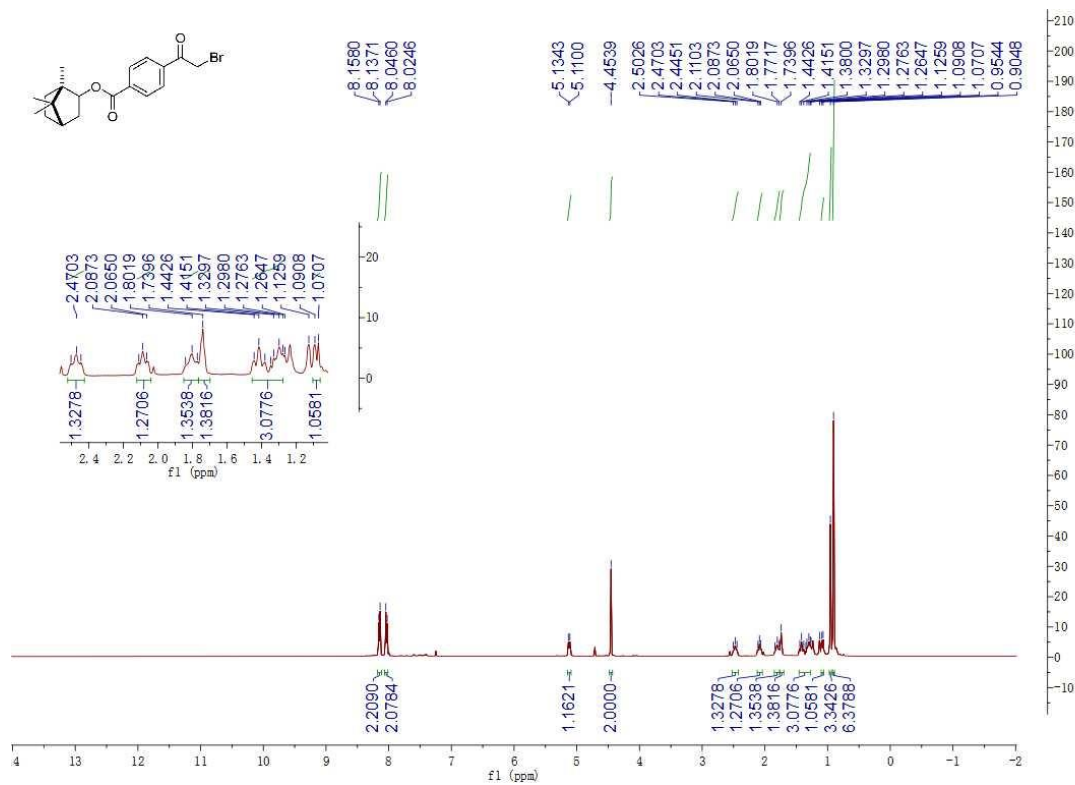

$^{13}\text{C}$  NMR (101 MHz,  $\text{CDCl}_3$ ) 3u

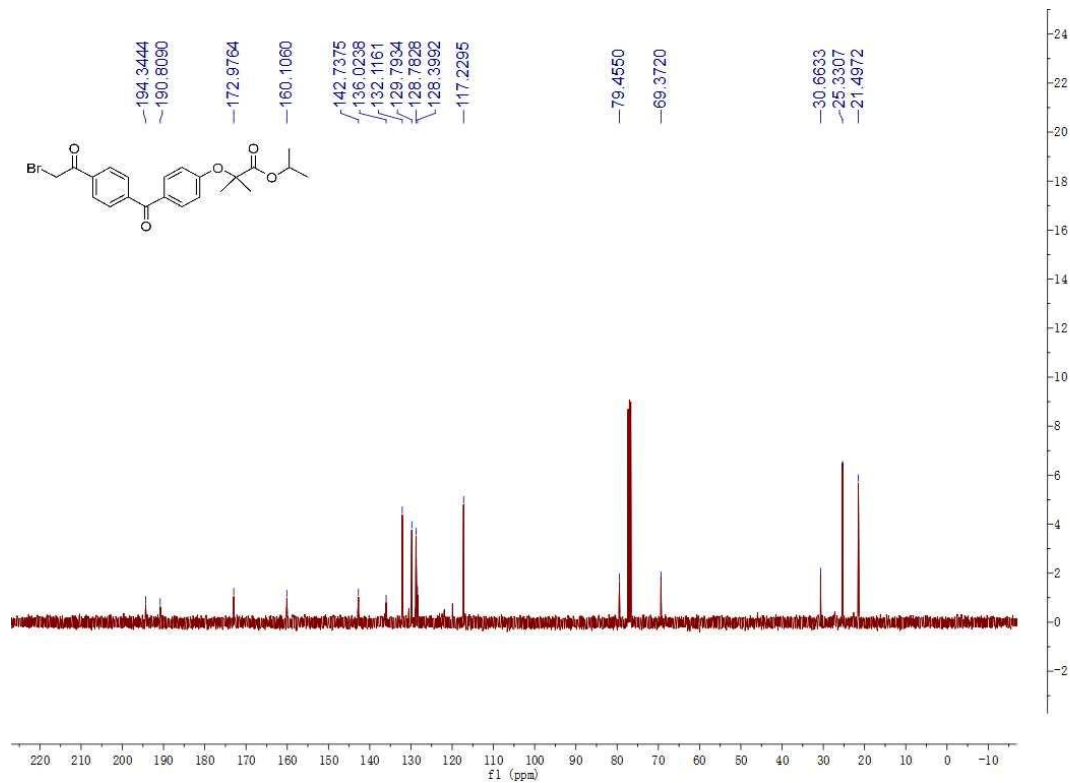

$^1\text{H}$  NMR (400 MHz,  $\text{CDCl}_3$ ) 3u

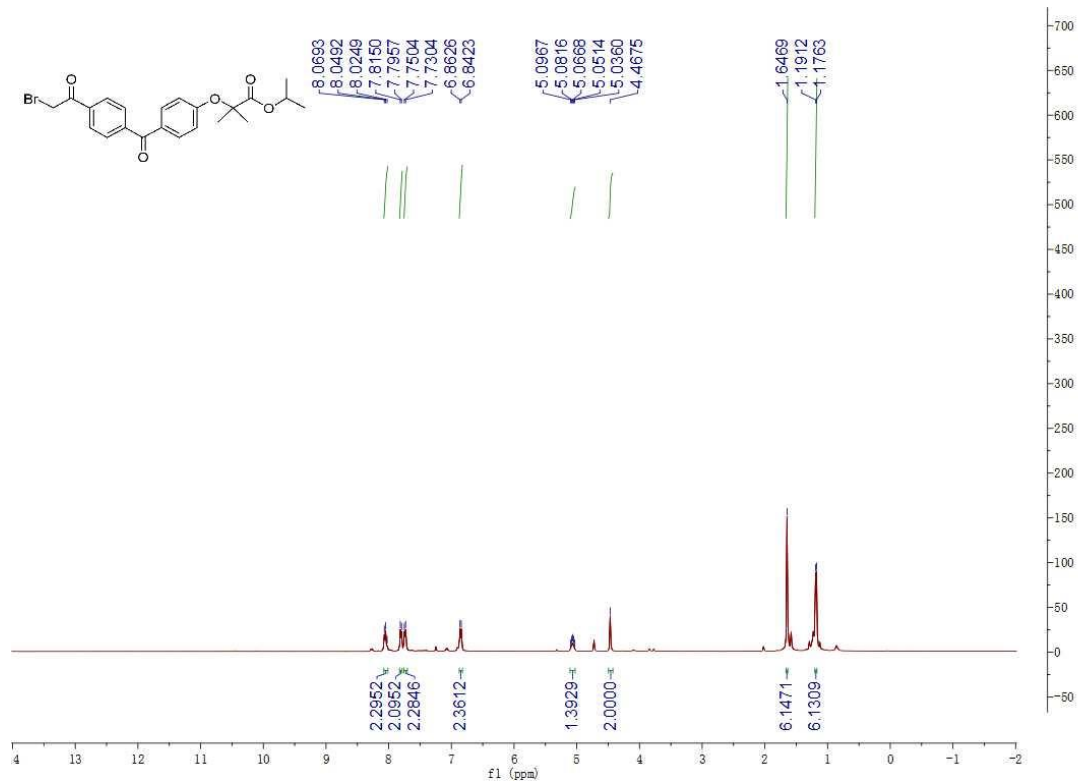

$^{13}\text{C}$  NMR (101 MHz,  $\text{CDCl}_3$ ) 3v

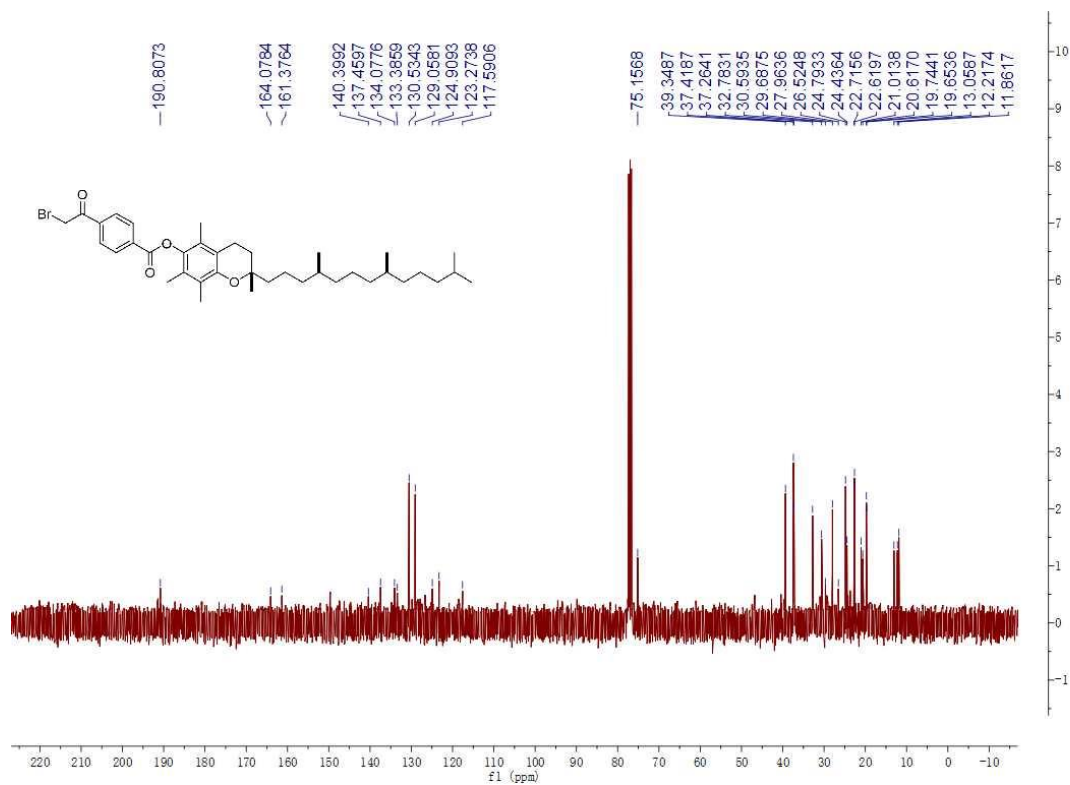

$^1\text{H}$  NMR (400 MHz,  $\text{CDCl}_3$ ) 3v

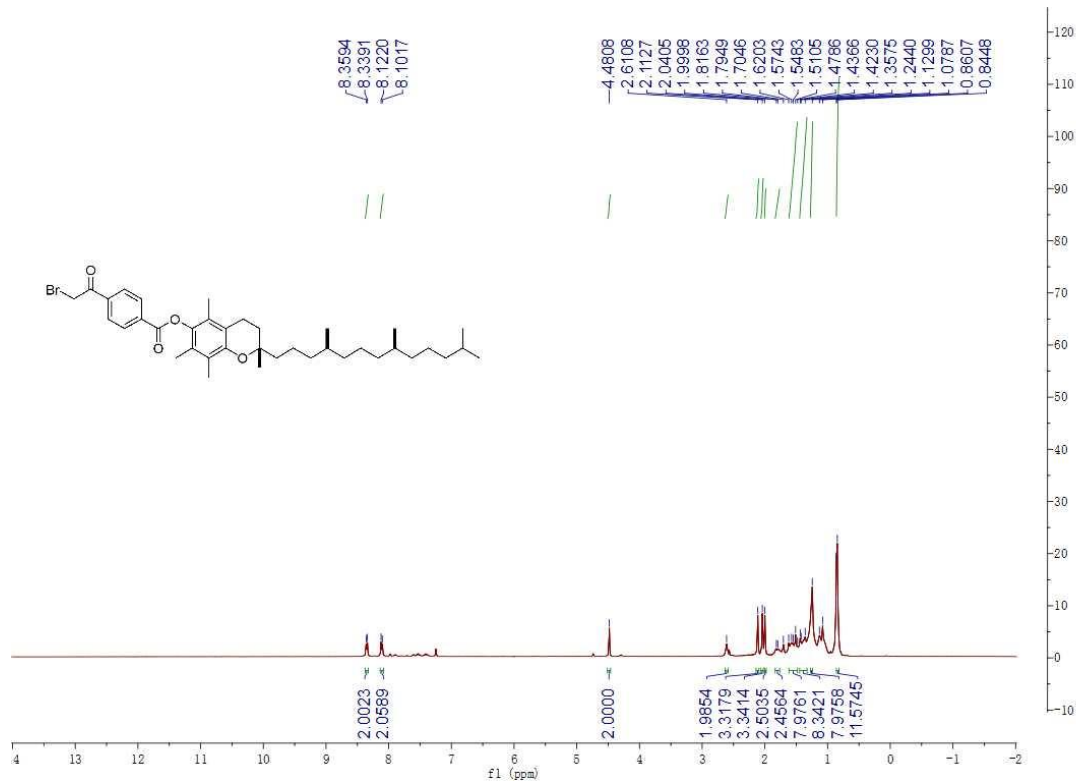

$^{13}\text{C}$  NMR (101 MHz,  $\text{CDCl}_3$ ) 3w

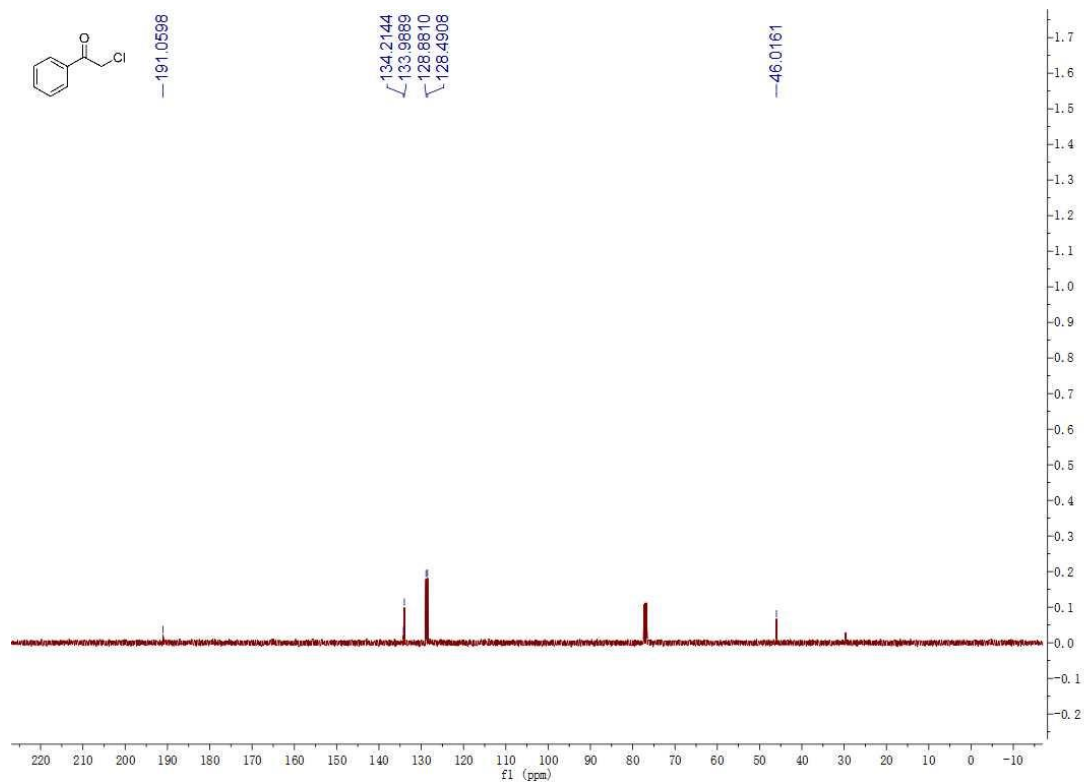

$^1\text{H}$  NMR (400 MHz,  $\text{CDCl}_3$ ) 3w

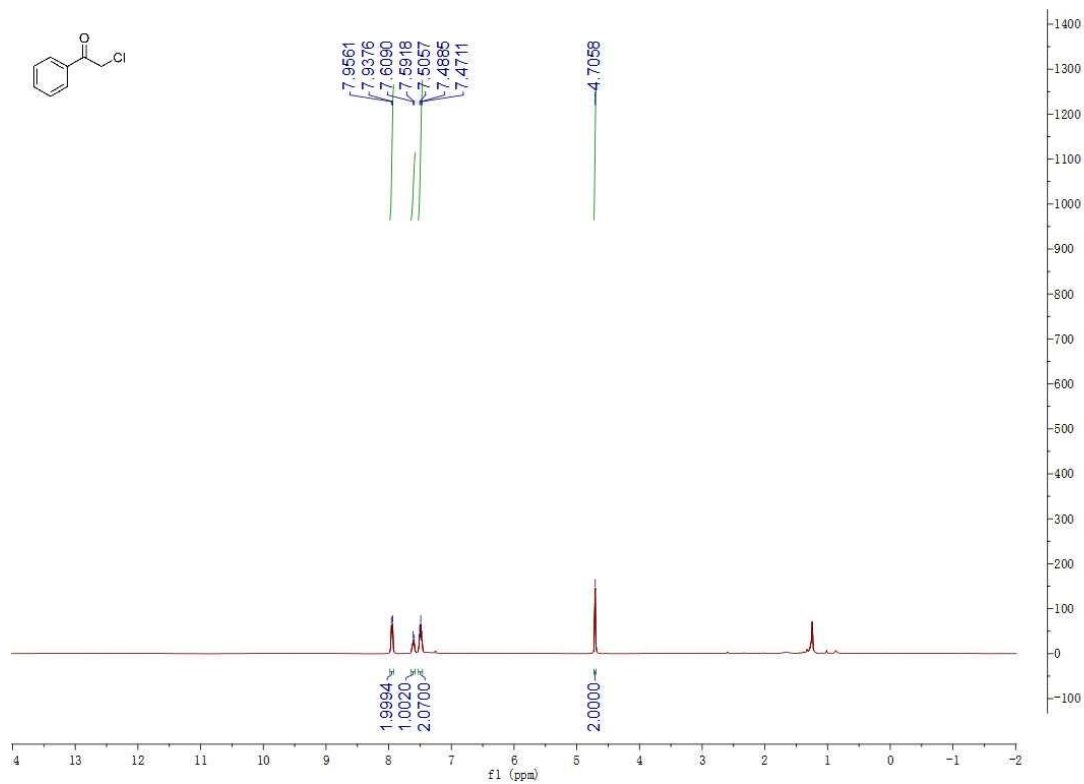

<sup>1</sup>H NMR spectrum (400 MHz, CDCl<sub>3</sub>) of compound **5a**

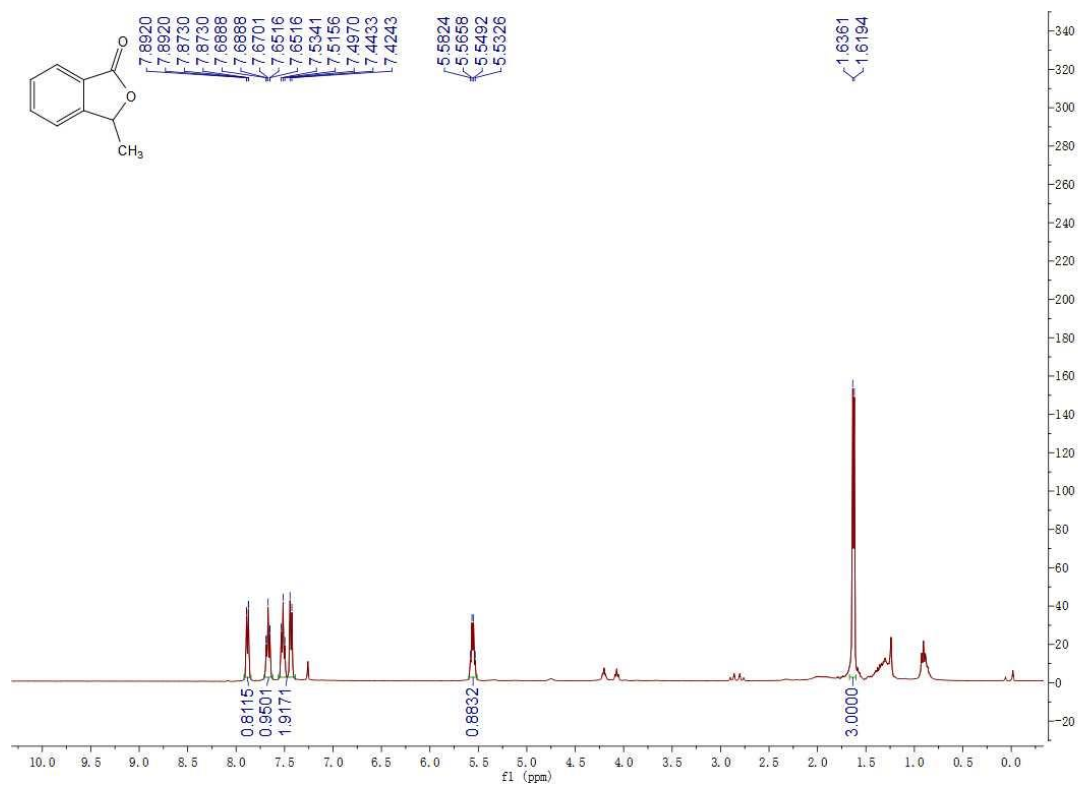

<sup>13</sup>C NMR spectrum (100 MHz, CDCl<sub>3</sub>) of compound **5a**

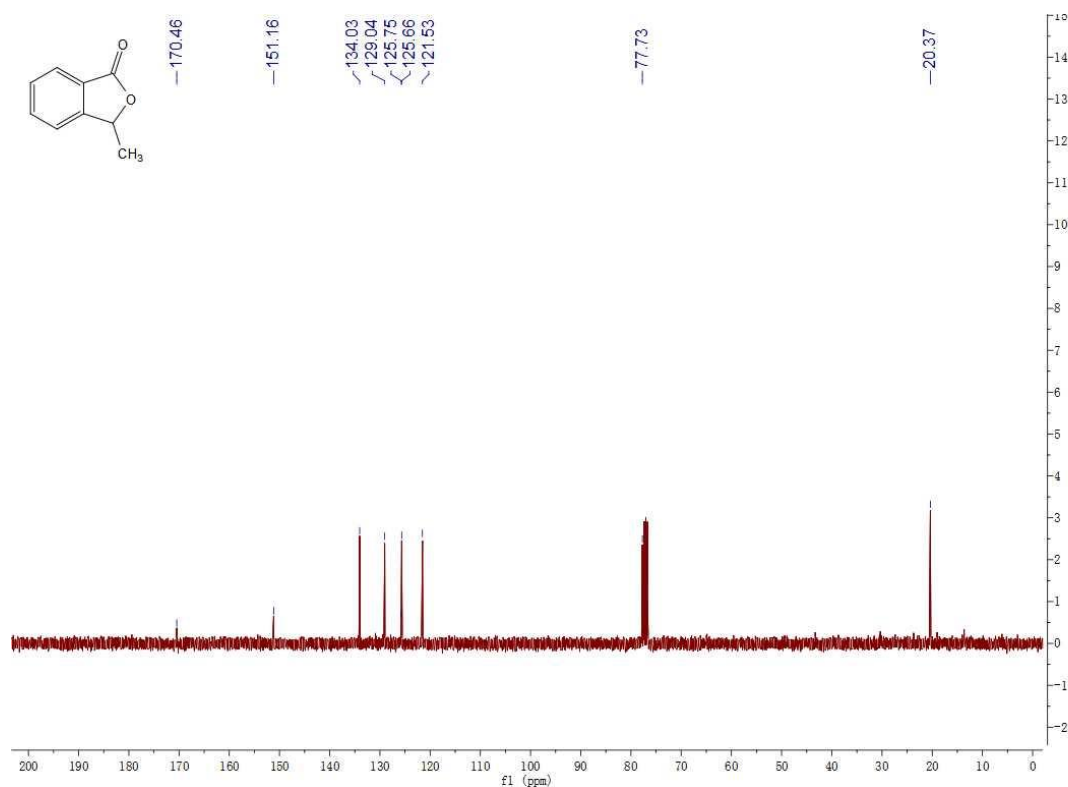



<sup>1</sup>H NMR spectrum (400 MHz, CDCl<sub>3</sub>) of compound **5b**

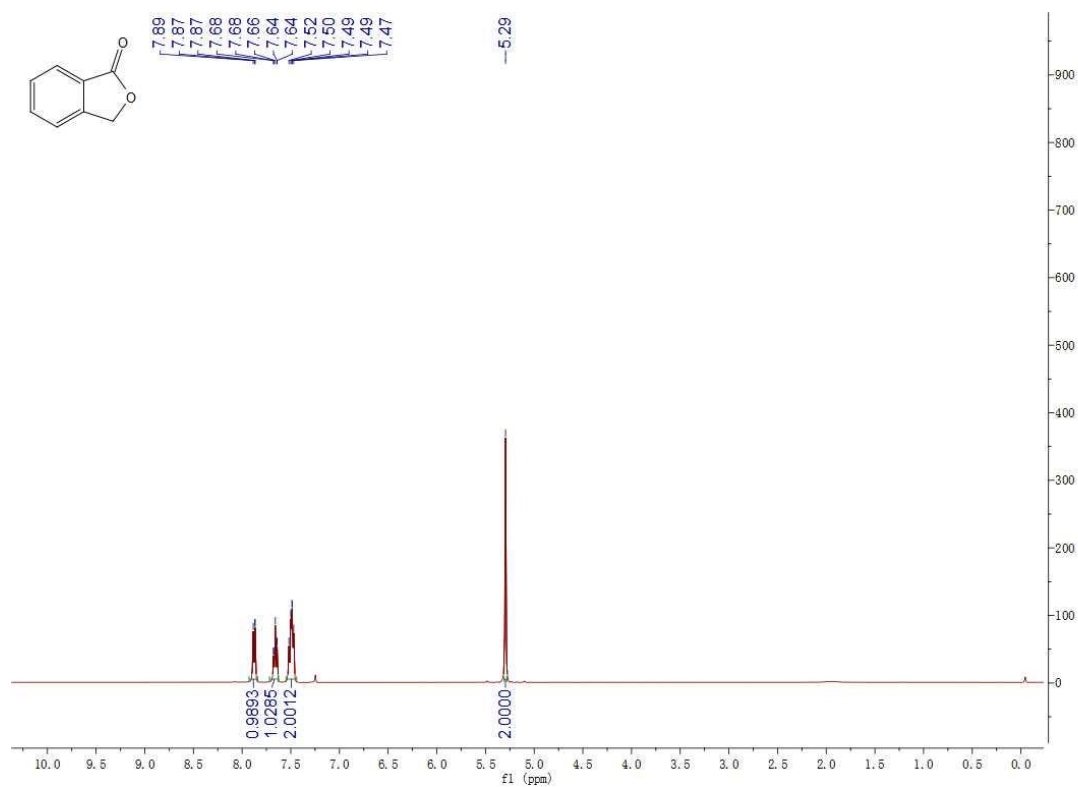

<sup>13</sup>C NMR spectrum (100 MHz, CDCl<sub>3</sub>) of compound **5b**

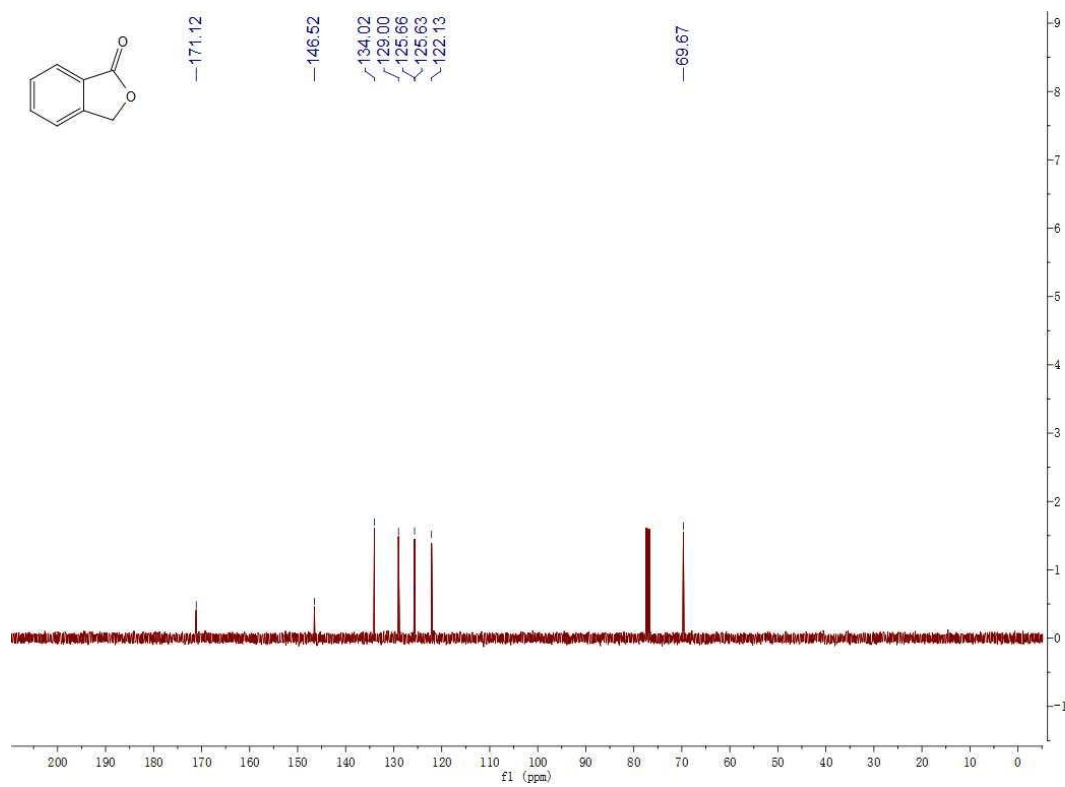

<sup>1</sup>H NMR spectrum (400 MHz, CDCl<sub>3</sub>) of compound **5c**

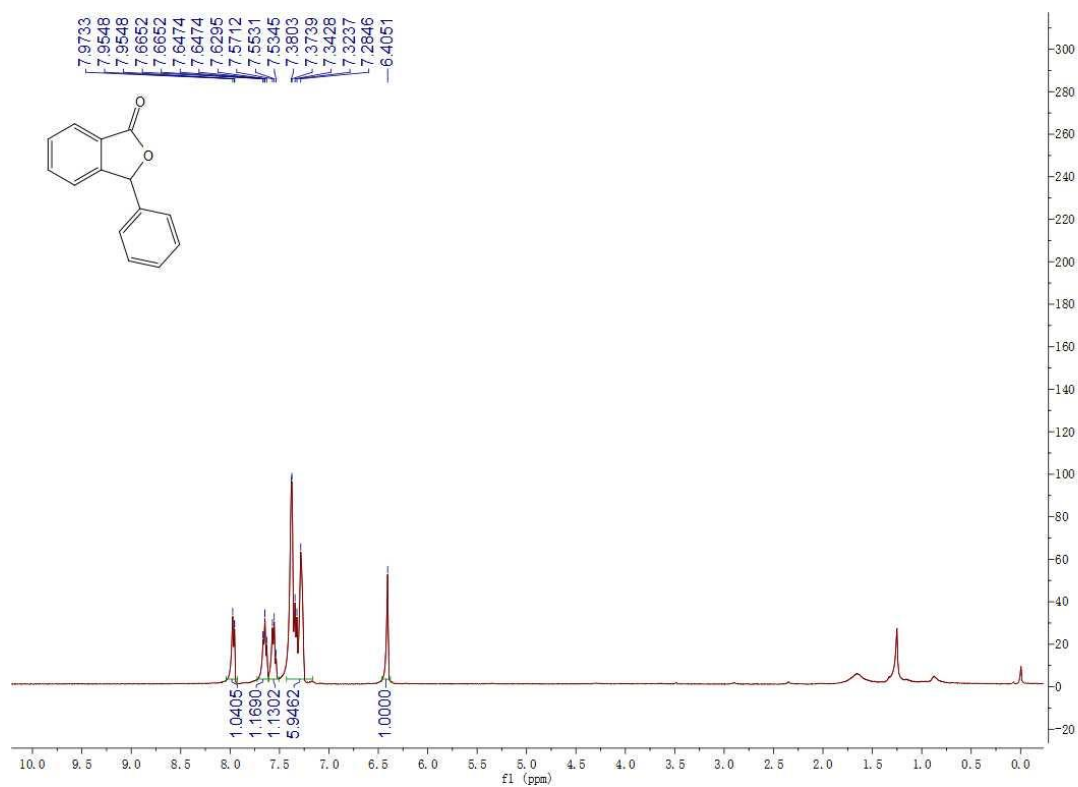

<sup>13</sup>C NMR spectrum (100 MHz, CDCl<sub>3</sub>) of compound **5c**

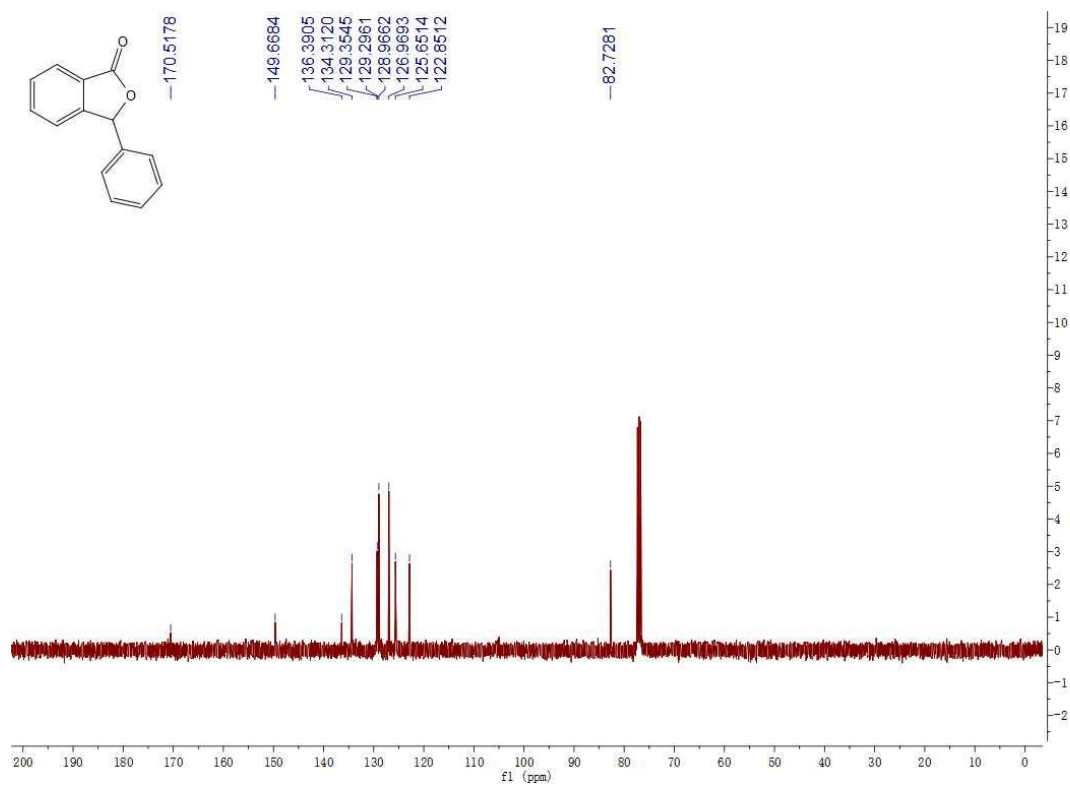

<sup>1</sup>H NMR spectrum (400 MHz, CDCl<sub>3</sub>) of compound **5d**

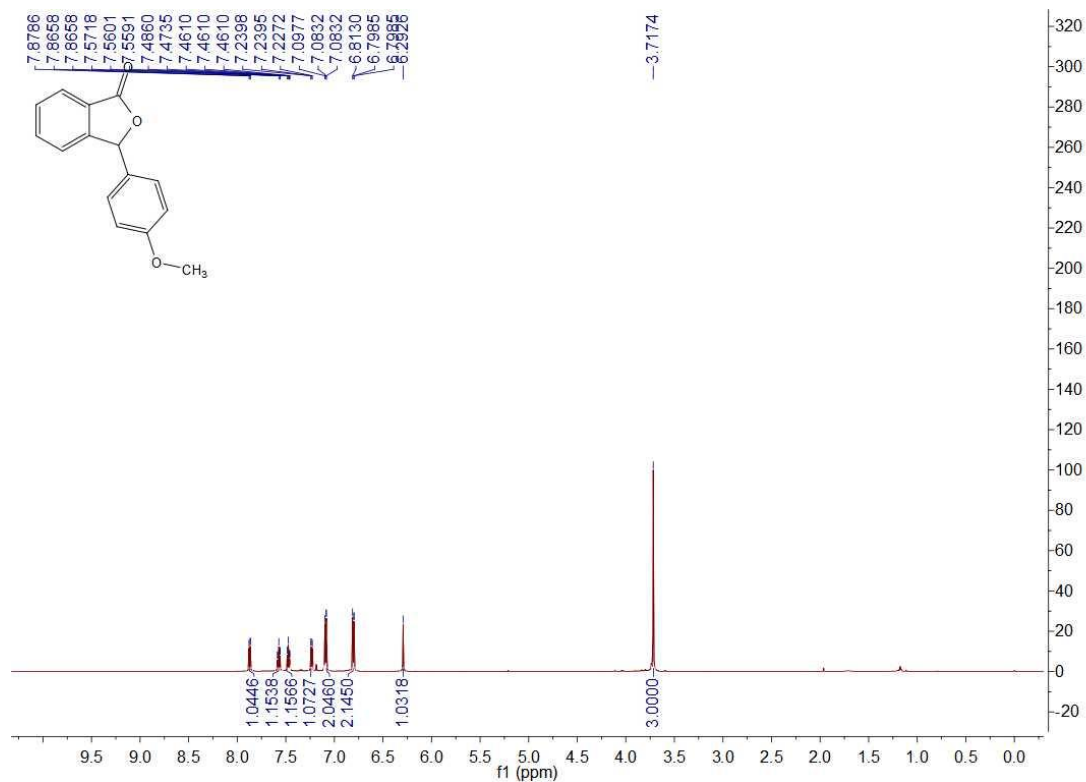

<sup>13</sup>C NMR spectrum (100 MHz, CDCl<sub>3</sub>) of compound **5d**

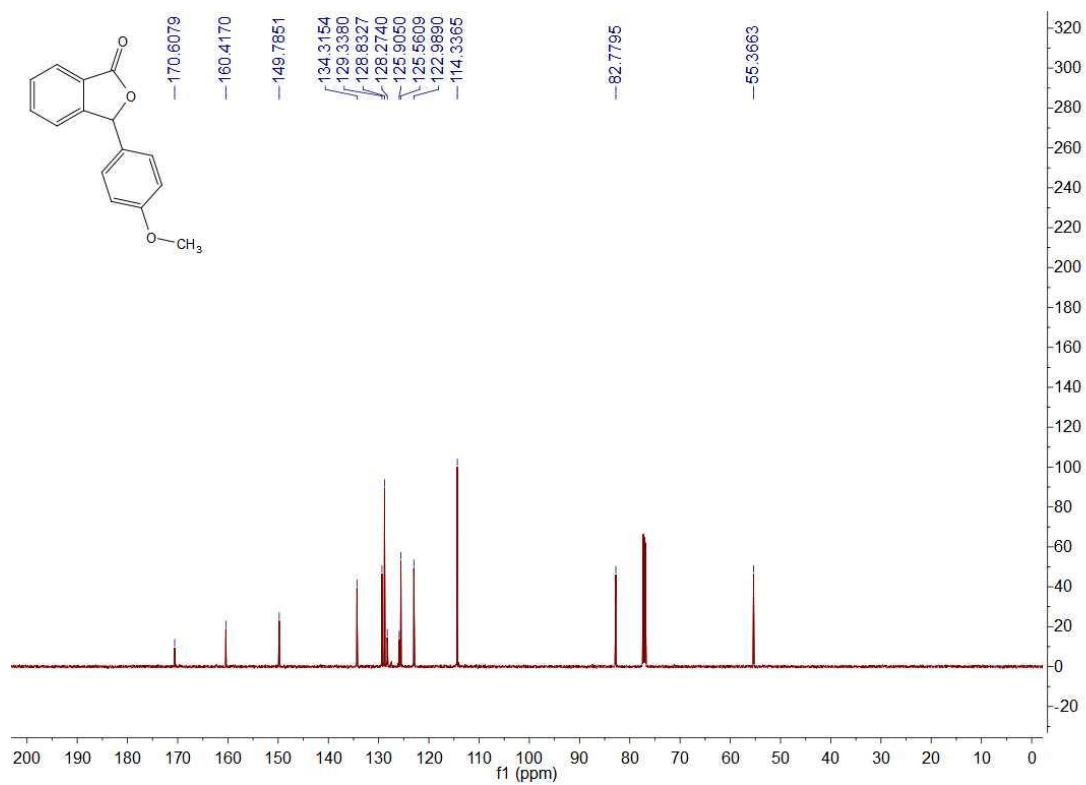

<sup>1</sup>H NMR spectrum (400 MHz, CDCl<sub>3</sub>) of compound **5e**

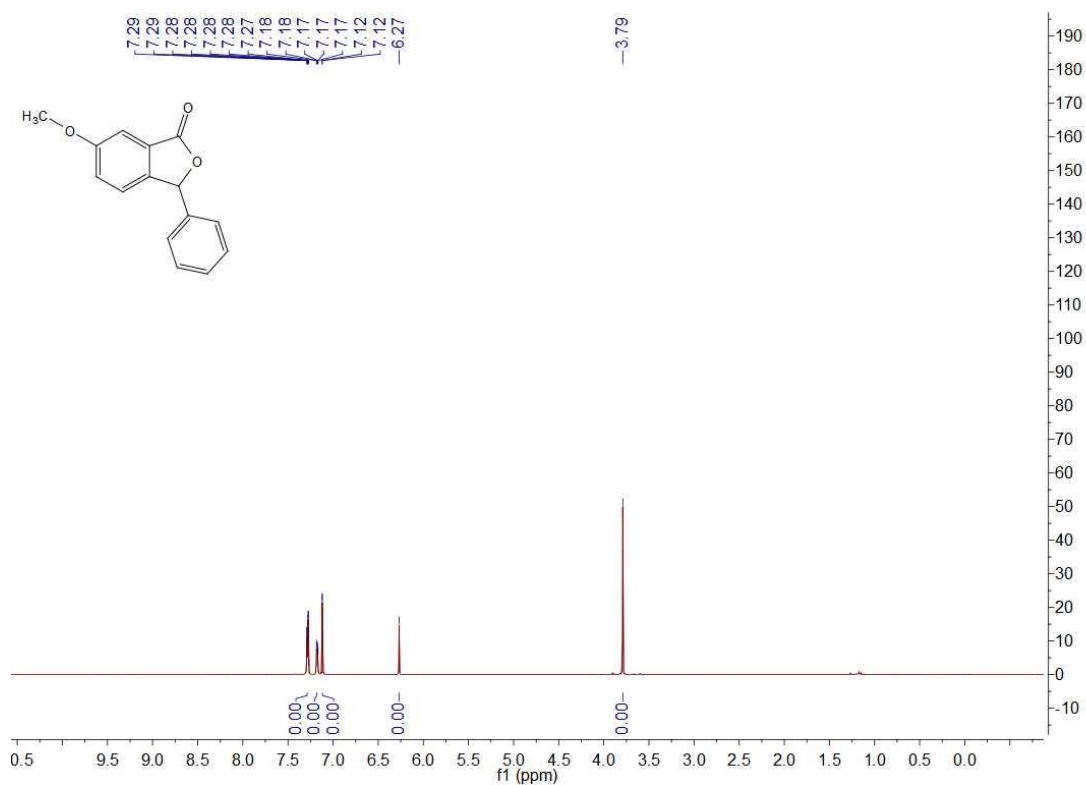

<sup>13</sup>C NMR spectrum (100 MHz, CDCl<sub>3</sub>) of compound **5e**

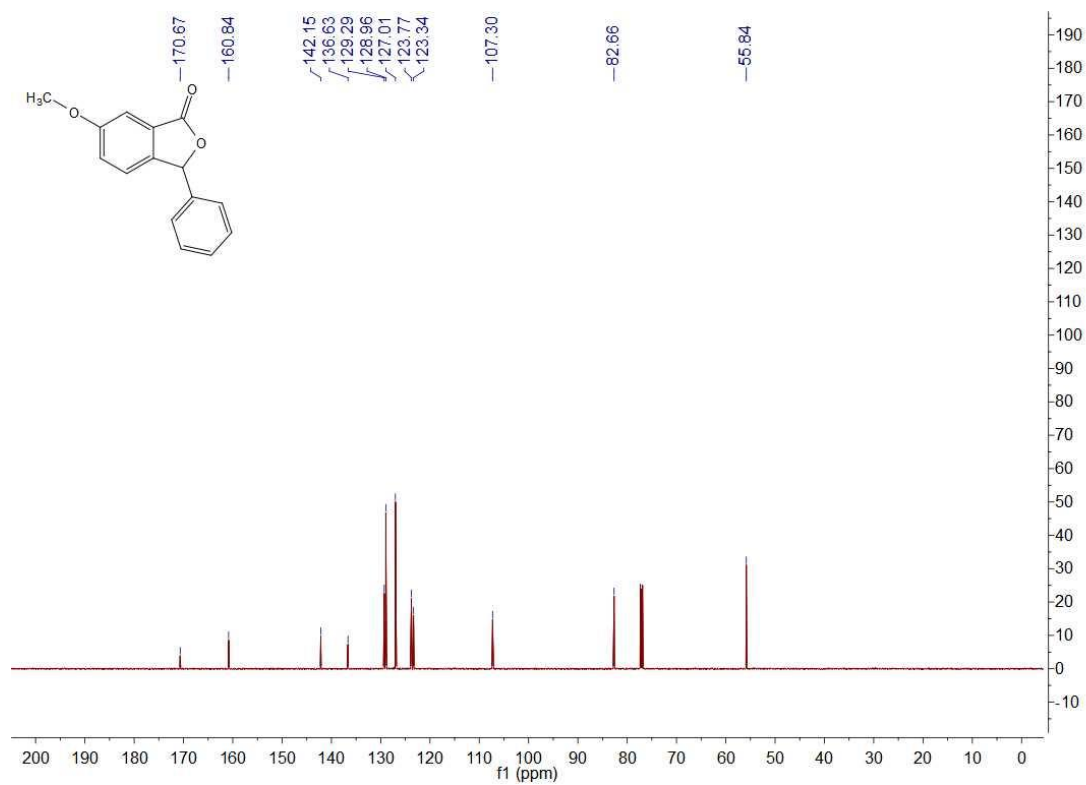

$^1\text{H}$  NMR spectrum (400 MHz, DMSO) of compound **8a**

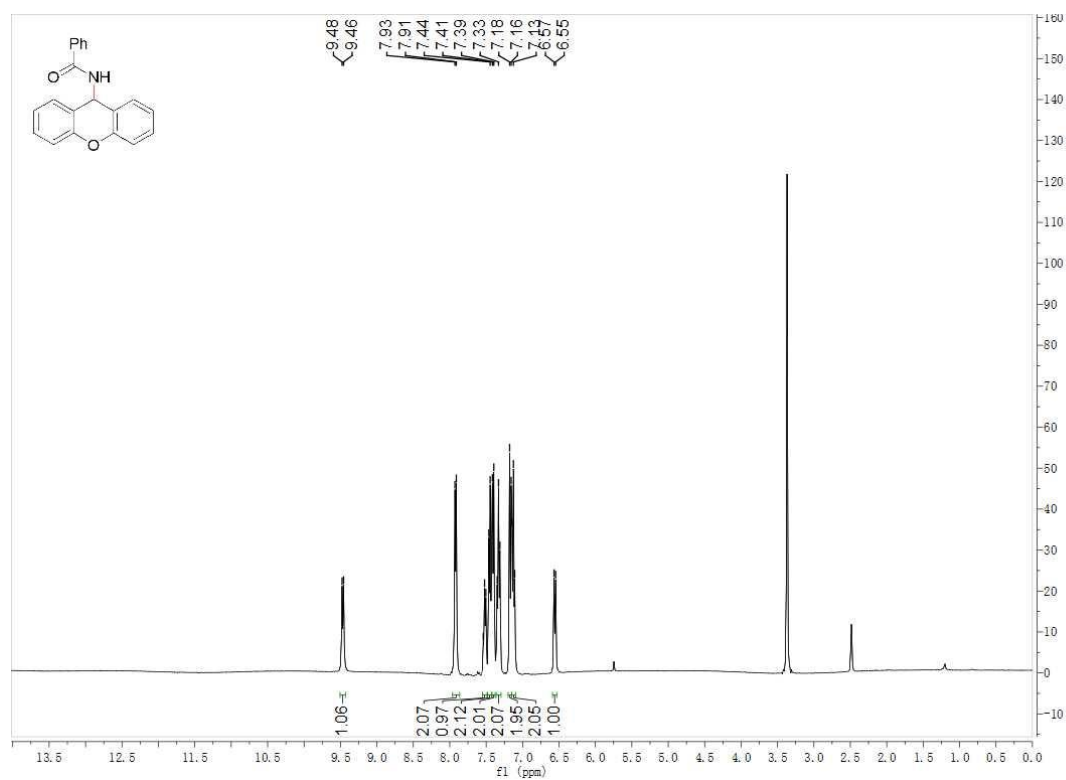

$^{13}\text{C}$  NMR spectrum (100 MHz, DMSO) of compound **8a**

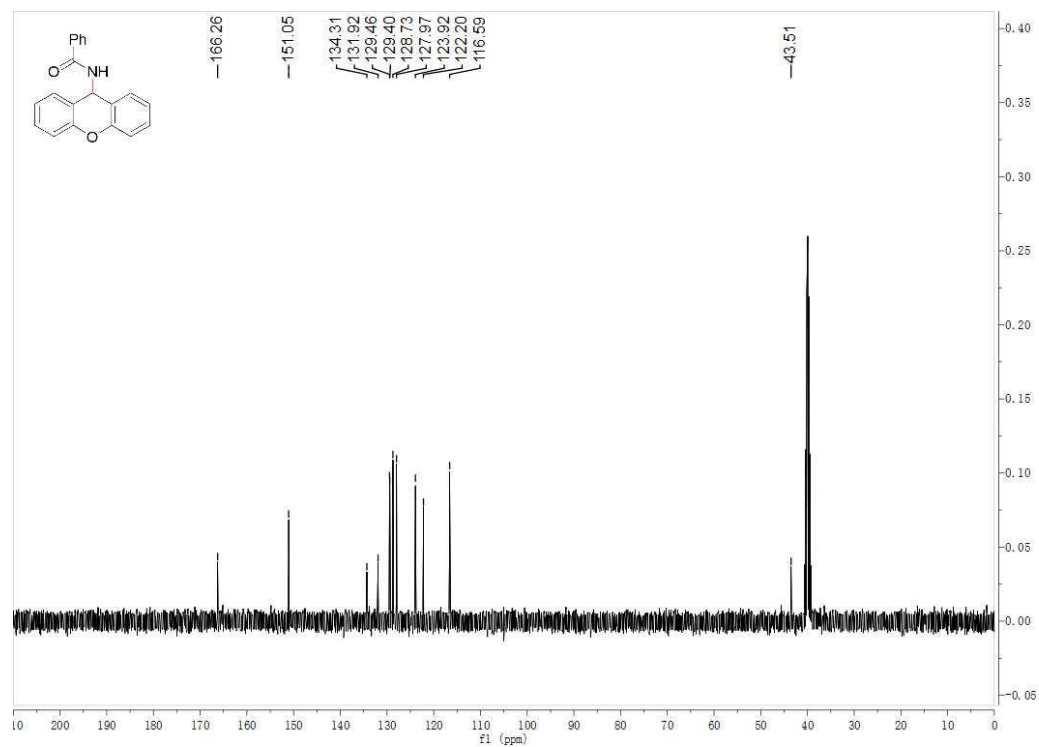

<sup>1</sup>H NMR spectrum (400 MHz, CDCl<sub>3</sub>) of compound **8b**

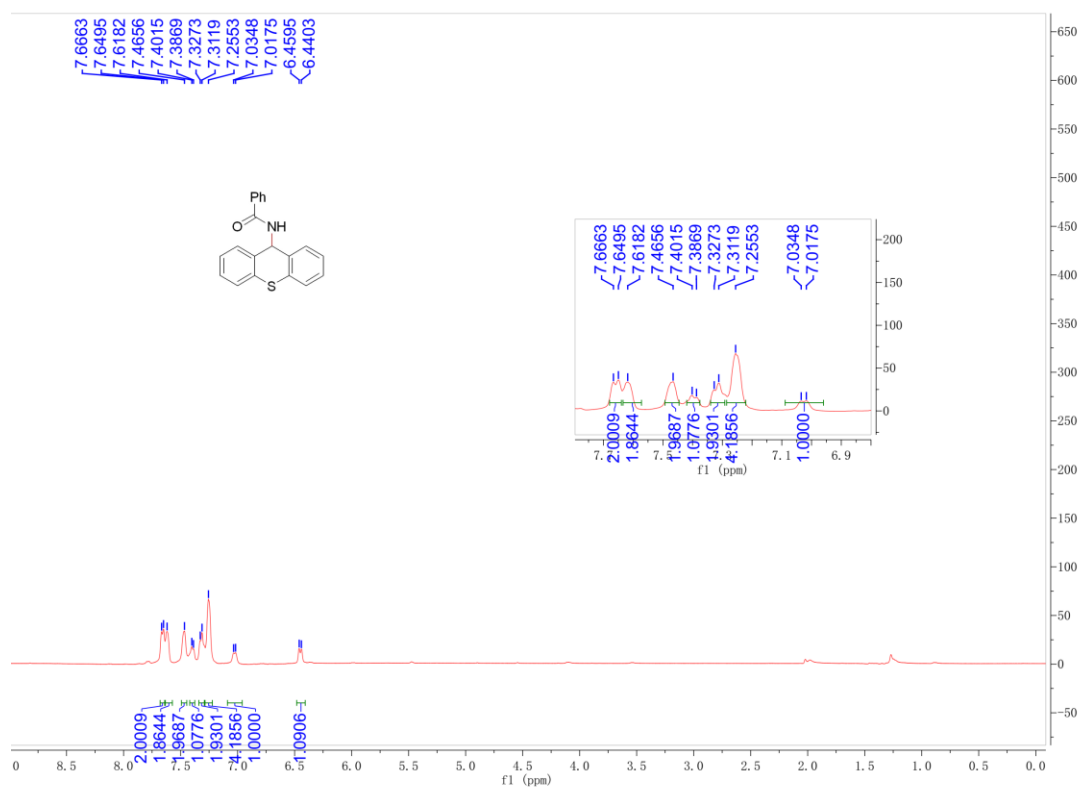

<sup>13</sup>C NMR spectrum (100 MHz, CDCl<sub>3</sub>) of compound **8b**

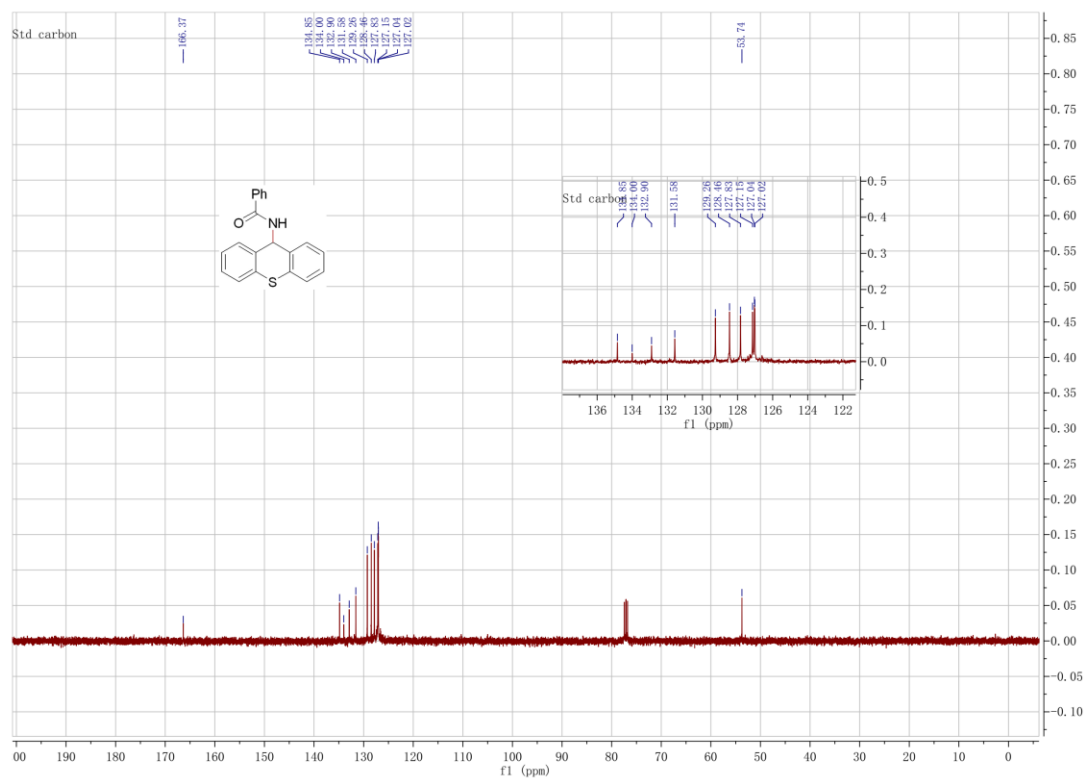

<sup>1</sup>H NMR spectrum (400 MHz, CDCl<sub>3</sub>) of compound **8c**

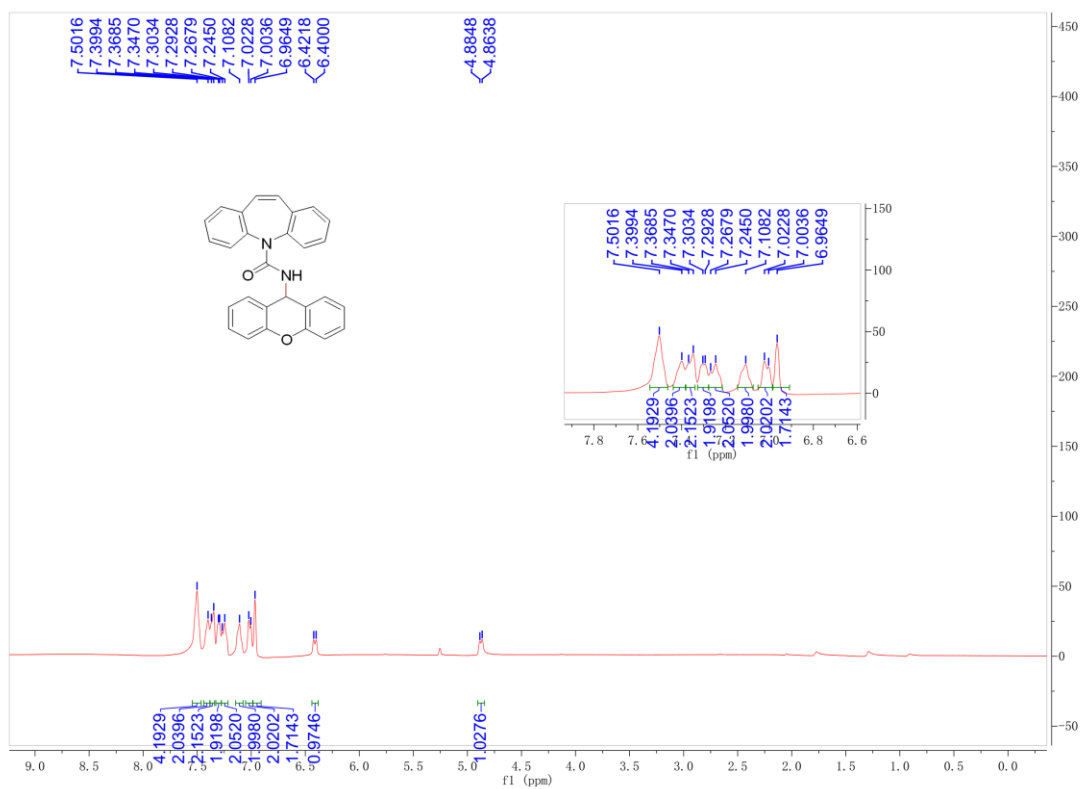

<sup>13</sup>C NMR spectrum (100 MHz, CDCl<sub>3</sub>) of compound **8c**

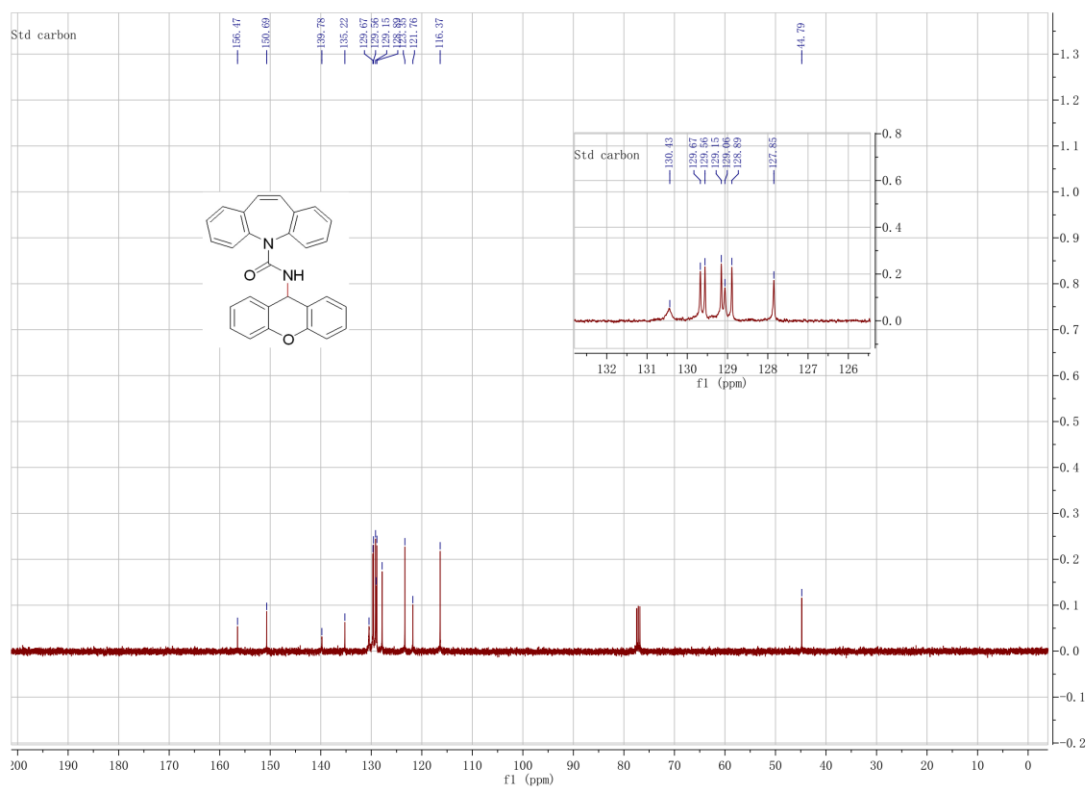

<sup>1</sup>H NMR spectrum (400 MHz, CDCl<sub>3</sub>) of compound **8d**

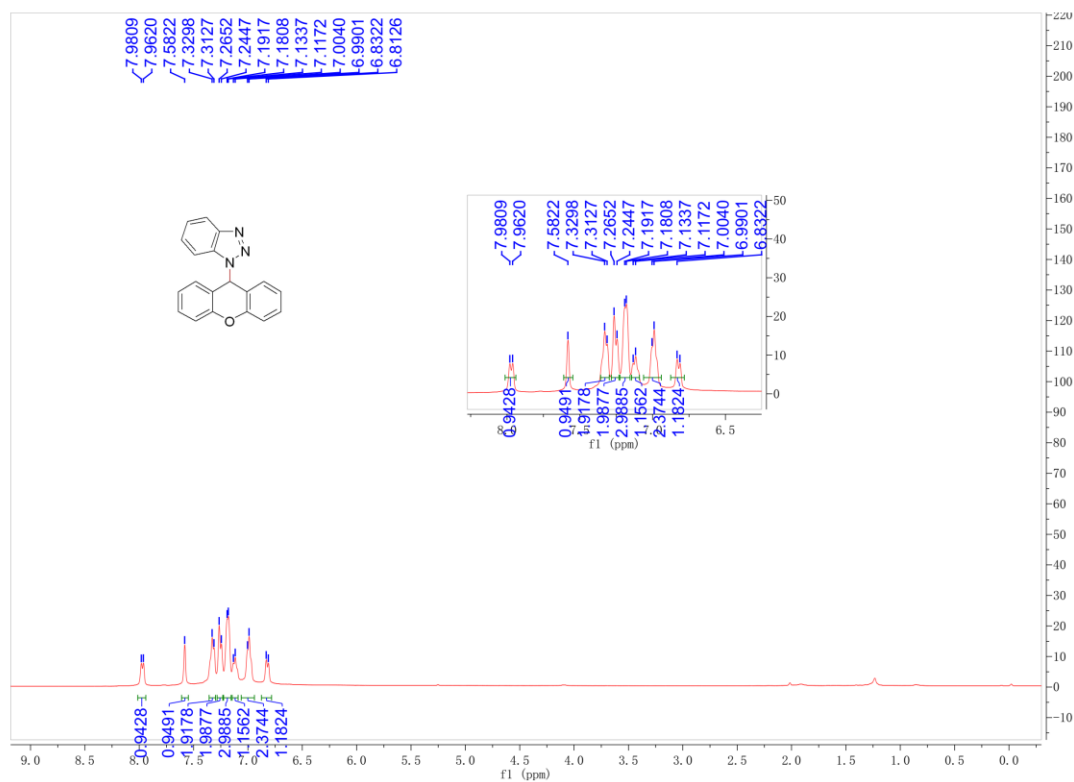

<sup>13</sup>C NMR spectrum (100 MHz, CDCl<sub>3</sub>) of compound **8d**

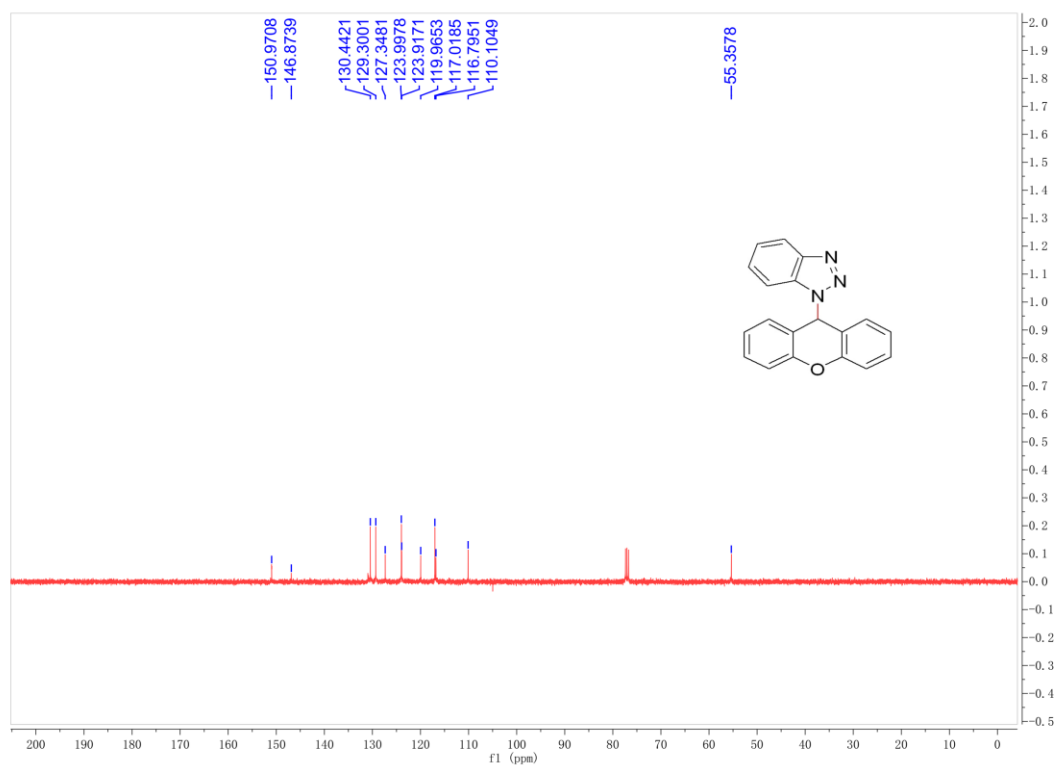





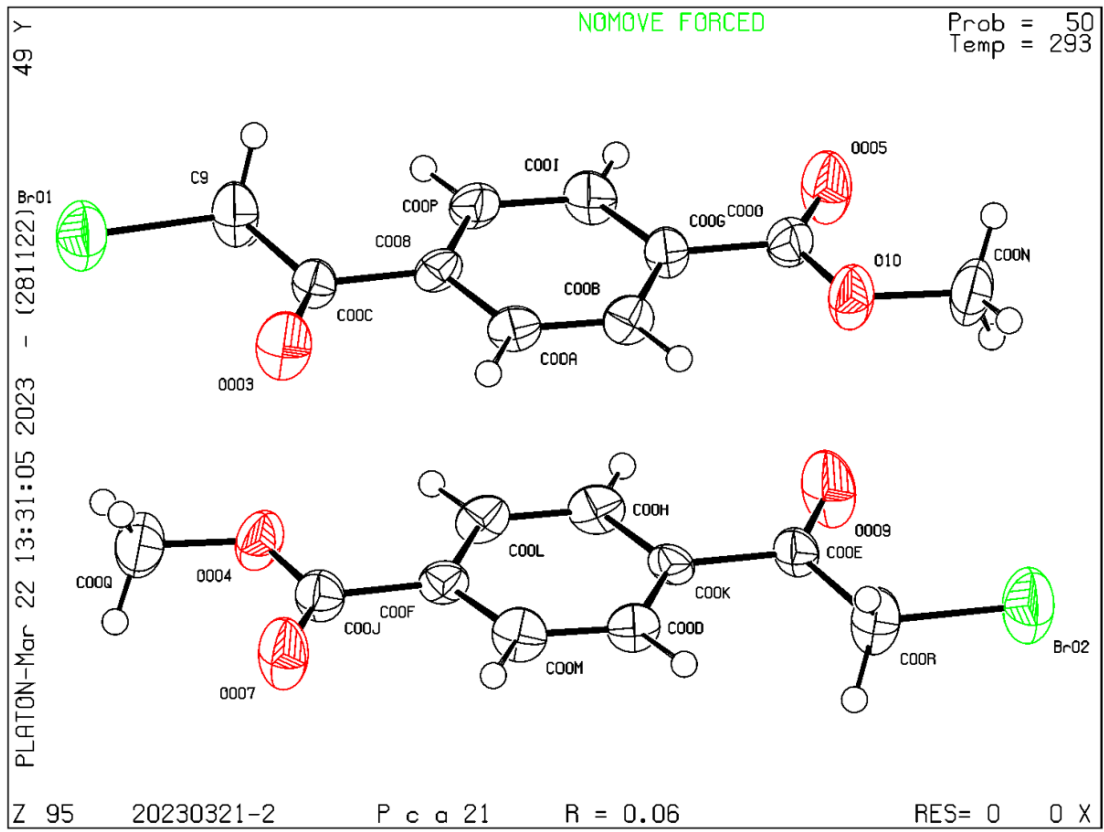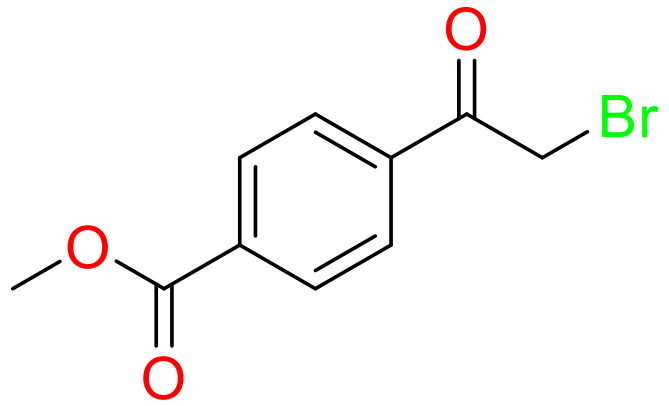

Supplement: d4cc04236k1.pdf [file d4cc04236k1.pdf]
